# Supplementary material for: Management of chronic neuropathic pain: a protocol for a multiple treatment comparison meta-analysis of randomised controlled trials
Source: PubMed Central journal article supplement — BMJ Open. 2014 Nov 20;4(11):e006112. doi: 10.1136/bmjopen-2014-006112 (PMC4244486; doi:10.1136/bmjopen-2014-006112), 2014-11-20
Supplement: bmjopen-2014-006112.draft_revisions.pdf [file bmjopen-2014-006112.draft_revisions.pdf]

# BMJ Open

## Management of chronic neuropathic pain: a protocol for a multiple treatment comparison meta-analysis of randomized controlled trials

|                                 |                                                                                                                                                                                                                                                                                                                                                                                                                                                                                                                                                                                                                                                                                                                                                                                                                                                                                                                                                                                                                                                                                                                                                                                                                                                                                                                                                                                          |
|---------------------------------|------------------------------------------------------------------------------------------------------------------------------------------------------------------------------------------------------------------------------------------------------------------------------------------------------------------------------------------------------------------------------------------------------------------------------------------------------------------------------------------------------------------------------------------------------------------------------------------------------------------------------------------------------------------------------------------------------------------------------------------------------------------------------------------------------------------------------------------------------------------------------------------------------------------------------------------------------------------------------------------------------------------------------------------------------------------------------------------------------------------------------------------------------------------------------------------------------------------------------------------------------------------------------------------------------------------------------------------------------------------------------------------|
| Journal:                        | <i>BMJ Open</i>                                                                                                                                                                                                                                                                                                                                                                                                                                                                                                                                                                                                                                                                                                                                                                                                                                                                                                                                                                                                                                                                                                                                                                                                                                                                                                                                                                          |
| Manuscript ID:                  | bmjopen-2014-006112                                                                                                                                                                                                                                                                                                                                                                                                                                                                                                                                                                                                                                                                                                                                                                                                                                                                                                                                                                                                                                                                                                                                                                                                                                                                                                                                                                      |
| Article Type:                   | Protocol                                                                                                                                                                                                                                                                                                                                                                                                                                                                                                                                                                                                                                                                                                                                                                                                                                                                                                                                                                                                                                                                                                                                                                                                                                                                                                                                                                                 |
| Date Submitted by the Author:   | 15-Jul-2014                                                                                                                                                                                                                                                                                                                                                                                                                                                                                                                                                                                                                                                                                                                                                                                                                                                                                                                                                                                                                                                                                                                                                                                                                                                                                                                                                                              |
| Complete List of Authors:       | Mulla, Sohail; McMaster University, Clinical Epidemiology & Biostatistics, HSC-2C7; Cleveland Clinic, Outcomes Research Consortium<br>Buckley, D; McMaster University, Anesthesia; McMaster University, Michael G. DeGroot Institute for Pain Research and Care<br>Moulin, Dwight; Western University, Clinical Neurological Sciences and Oncology<br>Couban, Rachel; McMaster University, Michael G. DeGroot Institute for Pain Research and Care<br>Izhar, Zain; McMaster University, Clinical Epidemiology & Biostatistics<br>Agarwal, Arnav; McMaster University, Clinical Epidemiology & Biostatistics<br>Panju, Akbar; McMaster University, Medicine; McMaster University, Michael G. DeGroot Institute for Pain Research and Care<br>Wang, Li; McMaster University, Anesthesia<br>Kallyth, Sun; McMaster University, Michael G. DeGroot Institute for Pain Research and Care<br>Turan, Alparslan; Cleveland Clinic, Outcomes Research<br>Montori, Victor; Mayo Clinic, Knowledge and Encounter Research Unit<br>Sessler, Daniel; Cleveland Clinic, Outcomes Research<br>Thabane, Lehana; McMaster University, Clinical Epidemiology & Biostatistics; McMaster University, Anesthesia<br>Guyatt, Gordon; McMaster University, Clinical Epidemiology and Biostatistics<br>Busse, Jason; McMaster University, Clinical Epidemiology & Biostatistics; McMaster University, Anesthesia |
| <b>Primary Subject Heading</b>: | Neurology                                                                                                                                                                                                                                                                                                                                                                                                                                                                                                                                                                                                                                                                                                                                                                                                                                                                                                                                                                                                                                                                                                                                                                                                                                                                                                                                                                                |
| Secondary Subject Heading:      | Anaesthesia, Patient-centred medicine, Medical management                                                                                                                                                                                                                                                                                                                                                                                                                                                                                                                                                                                                                                                                                                                                                                                                                                                                                                                                                                                                                                                                                                                                                                                                                                                                                                                                |
| Keywords:                       | Neurological pain < NEUROLOGY, Pain management < ANAESTHETICS, EPIDEMIOLOGY, STATISTICS & RESEARCH METHODS, Clinical trials < THERAPEUTICS                                                                                                                                                                                                                                                                                                                                                                                                                                                                                                                                                                                                                                                                                                                                                                                                                                                                                                                                                                                                                                                                                                                                                                                                                                               |
|                                 |                                                                                                                                                                                                                                                                                                                                                                                                                                                                                                                                                                                                                                                                                                                                                                                                                                                                                                                                                                                                                                                                                                                                                                                                                                                                                                                                                                                          |

1  
2  
3  
4  
5  
6  
7  
8  
9  
10  
11  
12  
13  
14  
15  
16  
17  
18  
19  
20  
21  
22  
23  
24  
25  
26  
27  
28  
29  
30  
31  
32  
33  
34  
35  
36  
37  
38  
39  
40  
41  
42  
43  
44  
45  
46  
47  
48  
49  
50  
51  
52  
53  
54  
55  
56  
57  
58  
59  
60

For peer review only

1  
2  
3 **Management of chronic neuropathic pain: a protocol for a multiple treatment**  
4 **comparison meta-analysis of randomized controlled trials**  
5  
6  
7  
8  
9  
10  
11

12  
13 Sohail M. Mulla, MSc<sup>\*1,2</sup> [mullasm@mcmaster.ca](mailto:mullasm@mcmaster.ca)  
14  
15 D. Norman Buckley, MD<sup>3,4</sup> [buckleyn@mcmaster.ca](mailto:buckleyn@mcmaster.ca)  
16  
17 Dwight E. Moulin, MD<sup>5</sup> [dwight.moulin@lhsc.on.ca](mailto:dwight.moulin@lhsc.on.ca)  
18  
19 Rachel Couban, MA, MIST<sup>4</sup> [rcouban@mcmaster.ca](mailto:rcouban@mcmaster.ca)  
20  
21 Zain Izhar<sup>1</sup> [izharmz@mcmaster.ca](mailto:izharmz@mcmaster.ca)  
22  
23 Arnav Agarwal, BHSc<sup>1</sup> [arnav.agarwal@learnlink.mcmaster.ca](mailto:arnav.agarwal@learnlink.mcmaster.ca)  
24  
25 Akbar Panju, MD<sup>4,6</sup> [panju@hhsc.ca](mailto:panju@hhsc.ca)  
26  
27 Li Wang, PhD<sup>3</sup> [lwang246@gmail.com](mailto:lwang246@gmail.com)  
28  
29 Sun Makosso Kallyth, PhD<sup>4</sup> [makossok@mcmaster.ca](mailto:makossok@mcmaster.ca)  
30  
31 Alparslan Turan, MD<sup>7</sup> [turana@ccf.org](mailto:turana@ccf.org)  
32  
33 Victor M. Montori, MD, MSc<sup>8</sup> [montori.victor@mayo.edu](mailto:montori.victor@mayo.edu)  
34  
35 Daniel I. Sessler, MD<sup>7</sup> [ds@or.org](mailto:ds@or.org)  
36  
37 Lehana Thabane, PhD<sup>1,3,9</sup> [thabanl@mcmaster.ca](mailto:thabanl@mcmaster.ca)  
38  
39 Gordon H. Guyatt, MD, MSc<sup>1,6</sup> [guyatt@mcmaster.ca](mailto:guyatt@mcmaster.ca)  
40  
41 Jason W. Busse, DC, PhD<sup>1,3,4</sup> [bussejw@mcmaster.ca](mailto:bussejw@mcmaster.ca)  
42  
43  
44  
45  
46  
47  
48  
49

50  
51 <sup>1</sup>Department of Clinical Epidemiology & Biostatistics, McMaster University, Hamilton,  
52 Ontario, Canada  
53

54  
55 <sup>2</sup>Outcomes Research Consortium, Cleveland, Ohio, United States  
56  
57  
58  
59  
60

1  
2  
3 <sup>3</sup>Department of Anesthesia, McMaster University, Hamilton, Ontario, Canada

4  
5 <sup>4</sup>Michael G. DeGroot Institute for Pain Research and Care, McMaster University,  
6  
7  
8 Hamilton, Ontario, Canada

9  
10 <sup>5</sup>Departments of Clinical Neurological Sciences and Oncology, Western University,  
11  
12 London, Ontario, Canada

13  
14 <sup>6</sup>Department of Medicine, McMaster University, Hamilton, Ontario, Canada

15  
16  
17 <sup>7</sup>Department of Outcomes Research, Cleveland Clinic, Cleveland, Ohio, USA

18  
19  
20 <sup>8</sup>Knowledge and Evaluation Research Unit, Divisions of Endocrinology and Diabetes,  
21  
22 and Health Care & Policy Research, Mayo Clinic, Rochester, Minnesota, USA

23  
24 <sup>9</sup>Department of Pediatrics, McMaster University, Hamilton, Ontario, Canada

25  
26  
27  
28  
29 \*Corresponding author:

30  
31  
32 Sohail M. Mulla, MSc

33  
34 Department of Clinical Epidemiology & Biostatistics, HSC-2C7

35  
36  
37 McMaster University

38  
39 1280 Main Street West

40  
41  
42 Hamilton, Ontario, L8S 4K1

43  
44  
45 Canada

46  
47  
48 E-mail: [mullasm@mcmaster.ca](mailto:mullasm@mcmaster.ca)

## ABSTRACT

**Introduction:** Chronic neuropathic pain is associated with reduced health-related quality of life and substantial socioeconomic costs. Current research addressing management of chronic neuropathic pain is limited. No review has evaluated all interventional studies for chronic neuropathic pain, which limits attempts to make inferences regarding the relative effectiveness of treatments.

**Methods and analysis:** We will conduct a systematic review of all randomized controlled trials evaluating therapies for chronic neuropathic pain. We will identify eligible trials, in any language, by a systematic search of CINAHL, EMBASE, MEDLINE, AMED, HealthSTAR, DARE, PsychINFO, and the Cochrane Central Registry of Controlled Trials. Eligible trials will: (1) enrol patients presenting with chronic neuropathic pain, and (2) randomize patients to alternative interventions (pharmacological or non-pharmacological) or an intervention and a control arm. Pairs of reviewers will, independently and in duplicate, screen titles and abstracts of identified citations, review the full texts of potentially eligible trials, and extract information from eligible trials. We will use a modified Cochrane instrument to evaluate risk of bias of eligible studies, recommendations from the Initiative on Methods, Measurement, and Pain Assessment in Clinical Trials (IMMPACT) to inform the outcomes we will collect, and the Grading of Recommendations Assessment, Development and Evaluation (GRADE) system to evaluate our confidence in treatment effects. When possible, we will conduct: (1) in direct comparisons, a random-effects meta-analyses to establish the

1  
2  
3 effect of reported therapies on patient-important outcomes; and (2) a multiple treatment  
4  
5 comparison meta-analysis within a Bayesian framework to assess the relative effects of  
6  
7 treatments. We will define *a priori* hypotheses to explain heterogeneity between studies,  
8  
9 and conduct meta-regression and subgroup analyses consistent with current best  
10  
11 practices.  
12  
13

14  
15  
16  
17 **Ethics and Dissemination:** We do not require ethics approval for our proposed review.  
18  
19 We will disseminate our findings through peer-reviewed publications and conference  
20  
21 presentations.  
22  
23

24  
25  
26  
27 **Registration:** PROSPERO (CRD42014009212).  
28  
29  
30  
31  
32  
33  
34  
35  
36  
37  
38  
39  
40  
41  
42  
43  
44  
45  
46  
47  
48  
49  
50  
51  
52  
53  
54  
55  
56  
57  
58  
59  
60

## STRENGTHS AND LIMITATIONS

- Our broad study eligibility criteria will allow us to generate more precise estimates of treatment effects, thus increasing generalizability of our results.
- We will use the GRADE approach to evaluate our confidence in treatment effects, and the IMMPACT guidelines to inform the outcomes we will collect. No existing review on the topic has done so.
- We will ensure interpretability by presenting both risk differences and measures of relative effect for all outcomes reported, and by presenting our findings with GRADE Evidence Profiles. No existing review on the topic has done so.
- Our results will be limited by possible shortcomings of the primary studies.

## BACKGROUND

Chronic neuropathic pain is defined as “pain arising as a direct consequence of a lesion or disease affecting the somatosensory system.”[1] It may be classified as central or peripheral, depending on the site of the lesion.[2] Among the causes of chronic neuropathic pain are metabolic disease (e.g. diabetes), infection (e.g. shingles), trauma (e.g. spinal cord injury), and autoimmune disease (e.g. multiple sclerosis).[3-5] The pain may be spontaneous or evoked in response to physical stimuli. The latter may manifest as increased sensitivity to pain (hyperalgesia) or as a painful response to a stimulus that would not normally be painful (allodynia).[4, 6]

Chronic neuropathic pain is common worldwide, affecting 7% to 10% of the general population.[7] It is associated with depression, anxiety, and sleep disturbances, and patients with chronic neuropathic pain experience lower health-related quality of life than the general population.[8-11]

Chronic neuropathic pain is associated with substantial economic burden. Tarride et al. estimated that managing a Canadian patient with chronic neuropathic pain over a three-month period costs an average of \$2,567, of which 52% are direct costs, e.g. cost of physicians, diagnostic tests, and surgical procedures.[12] Others report that people suffering from chronic neuropathic pain generate medical costs that are three times greater than those not living with pain.[11, 13] In the United States alone, almost \$40



1  
2  
3 billion annually in health care, disability and related costs is attributed to chronic  
4  
5 neuropathic pain.[4]  
6  
7  
8  
9

10 The underlying mechanisms of chronic neuropathic pain are poorly understood, which  
11 complicates management. Both non-pharmacological and pharmacological treatments  
12 are currently used. A limited number of systematic reviews focus on non-  
13 pharmacological options, including electrical nerve stimulation,[14] acupuncture,[15, 16]  
14 and cognitive behavioural therapy [17]. Most report pharmacological treatments for  
15 chronic neuropathic pain, including antidepressants,[18] anticonvulsants,[19] and opioid  
16 analgesics.[20]  
17  
18  
19  
20  
21  
22  
23  
24  
25  
26  
27  
28

29 Significant gaps remain though. For example, randomized controlled trials (RCTs)  
30 exploring treatment for chronic neuropathic pain often compare pharmacological  
31 treatments against placebo and seldom against each other. Consequently, there are  
32 few direct comparisons among treatments. A recent systematic review found that  
33 among 131 RCTs published between 1969 and 2007 and addressing painful diabetic  
34 neuropathy and postherpetic neuralgia, both common types of peripheral neuropathic  
35 pain, only 25 studies (19%) compared drugs directly against each other.[21]  
36  
37  
38  
39  
40  
41  
42  
43  
44  
45  
46  
47

48 Although systematic reviews have addressed management of chronic neuropathic pain,  
49 most focus on select therapies [18, 20, 22-45] or specific syndromes.[46-56] No review  
50 to date has systematically evaluated all evidence for management of chronic  
51 neuropathic pain. Additionally, risk of bias assessment of studies included in existing  
52  
53  
54  
55  
56  
57  
58  
59  
60

1  
2  
3 reviews has been variable, and authors often depended on instruments that have been  
4 criticized for being overly simplistic (e.g. Jadad system) and/or assessed risk of bias on  
5 a per-study basis rather than overall for reported outcome.[57, 58] Furthermore,  
6 strategies to identify studies have been limited, as authors used few search terms, they  
7 did not search major literature databases, and/or they did not consider foreign language  
8 studies – an approach that would have excluded 12% of eligible trials in a systematic  
9 review of another chronic pain syndrome.[59] As well, none of the reviews employ the  
10 Grading of Recommendations Assessment, Development and Evaluation (GRADE)  
11 approach to evaluate the confidence in effect estimates (quality of evidence) for  
12 reported outcomes. And finally, none of the existing reviews facilitate interpretability, for  
13 instance, by presenting results in terms of minimally important differences (MID).  
14  
15  
16  
17  
18  
19  
20  
21  
22  
23  
24  
25  
26  
27  
28  
29  
30  
31

32 The limitations of previous works suggests the need for a new systematic review to be  
33 conducted using state-of-the-art methodology to inform evidence-based management of  
34 chronic neuropathic pain. We thus plan a systematic review and multiple treatment  
35 comparison meta-analysis of therapies for chronic neuropathic pain.  
36  
37  
38  
39  
40  
41  
42  
43  
44  
45  
46  
47  
48  
49  
50  
51  
52  
53  
54  
55  
56  
57  
58  
59  
60

## METHODS

### ***Standardized Reporting***

Our paper will conform to the Preferred Reporting Items for Systematic Reviews and Meta-Analyses (PRISMA) guidelines for reporting systematic reviews of RCTs.

### ***Protocol Registration***

Our protocol is registered on PROSPERO (registration number: CRD42014009212).

### ***Search Strategy***

We will identify relevant RCTs, in any language, by a systematic search of CINAHL, EMBASE, MEDLINE, AMED, HealthSTAR, DARE, PsychINFO, PapersFirst, ProceedingsFirst, and the Cochrane Central Registry of Controlled Trials, from the inception of each database. Our search will be refined for individual databases by a highly experienced medical librarian (RC) [Appendix 1 is a proposed search strategy for MEDLINE]. Reviewers will scan the bibliographies of all retrieved trials and other relevant publications, including reviews and meta-analyses, for additional relevant articles.

### ***Eligibility criteria and their application to potentially eligible articles***

Using standardized forms, reviewers trained in health research methodology will work in pairs to screen, independently and in duplicate, titles and abstracts of identified citations and acquire the full text publication of articles that both reviewers judge as potentially

1  
2  
3 eligible. Using a standardized form, the same reviewer teams will independently apply  
4  
5 eligibility criteria to the full text of potentially eligible trials. We will measure agreement  
6  
7 between reviewers to assess the reliability of full-text review using the guidelines  
8  
9 proposed by Landis and Koch.[60] Specifically, we will calculate Kappa values, and  
10  
11 interpret them using the following thresholds: <0.20 as slight agreement, 0.21-0.40 as  
12  
13 fair agreement, 0.41-0.60 as moderate agreement, 0.61-0.80 as substantial agreement,  
14  
15 and >0.80 as almost perfect agreement. Eligible trials will: (1) enrol patients presenting  
16  
17 with chronic neuropathic pain [Appendix 2 lists all syndromes we are studying], and (2)  
18  
19 randomize patients to alternative interventions (pharmacological or non-  
20  
21 pharmacological) or to an intervention and control arm.  
22  
23  
24  
25  
26  
27  
28

### 29 ***Data Abstraction and Analysis***

30  
31 Before starting data abstraction, we will conduct calibration exercises to ensure  
32  
33 consistency between reviewers. Teams of reviewers will extract data independently and  
34  
35 in duplicate from each eligible study using standardized forms and a detailed instruction  
36  
37 manual to inform tailoring of an online data abstraction program, DistillerSR  
38  
39 (<http://systematic-review.net/>). We will extract data regarding patient demographics, trial  
40  
41 methodology, intervention details, and outcome data guided by the Initiative on  
42  
43 Methods, Measurement, and Pain Assessment in Clinical Trials (IMMPACT).[61, 62]  
44  
45 Specifically, we will collect outcome data across the following nine IMMPACT-  
46  
47 recommended core outcome domains: (1) pain; (2) physical functioning; (3) emotional  
48  
49 functioning; (4) participant ratings of improvement and satisfaction with treatment; (5)  
50  
51 symptoms and adverse events; (6) participation disposition; (7) role functioning; (8)  
52  
53  
54  
55  
56  
57  
58  
59  
60

1  
2  
3 Interpersonal functioning; and (9) sleep and fatigue. We will collect data for all adverse  
4  
5 outcomes as guided by Ioannidis and Lau.[63] We will resolve disagreements by  
6  
7 discussion to achieve consensus.  
8  
9

### 10 11 12 ***Evaluating risk of bias in individual studies***

13  
14 Reviewers will assess risk of bias using a modified Cochrane risk of bias instrument that  
15  
16 includes response options of “definitely or probably yes” – assigned a low risk of bias –  
17  
18 or “definitely or probably no” – assigned a high risk of bias, an approach we have  
19  
20 previously shown to be valid.[64] We will evaluate sequence generation, allocation  
21  
22 sequence concealment; blinding of participants and study personnel; and, incomplete  
23  
24 outcome data.[65] We will resolve any disagreements between reviewers by discussion.  
25  
26 We will contact study authors if limitations in reporting lead to uncertainties in eligibility,  
27  
28 risk of bias, or outcome.  
29  
30  
31  
32  
33  
34  
35

### 36 37 ***Direct comparisons meta-analyses***

38  
39 In comparison to fixed effect models, random effect models are conservative in that they  
40  
41 consider both within- and among-study variability. Recent methodological research has  
42  
43 shown that while popular, the DerSimonian–Laird method [66] can produce narrow  
44  
45 confidence intervals when the number of studies is small or when they are substantively  
46  
47 heterogeneous.[67, 68] Therefore, to pool outcome data for trials that make direct  
48  
49 comparisons between interventions and alternatives, we will use the likelihood profile  
50  
51 approach.[69] We will pool cross-over trials with parallel design RCTs using methods  
52  
53 outlined in the Cochrane handbook to derive effect estimates.[65] Specifically, we will  
54  
55  
56  
57  
58  
59  
60

1  
2  
3 perform a paired t-test for each crossover trial if any of the following are available: (1)  
4 the individual participant data; (2) the mean and standard deviation (SD) or standard  
5 error (SE) of the participant-specific differences and between the intervention and  
6 control measurement; (3) the mean difference (MD) and one of the following: (i) a t-  
7 statistic from a paired t-test; (ii) a P value from a paired t-test; (iii) a confidence interval  
8 from a paired analysis; or (4) a graph of measurements of the intervention arm and  
9 control arm from which we can extract individual data values, so long as the matched  
10 measurement for each individual can be identified.[65] If these data are not available,  
11 we will approximate paired analyses by calculating the MDs and the corresponding SEs  
12 for the paired analyses.[65] If the SE or SD of within-participant differences are not  
13 available, we will impute the SD using the methods outlined in the Cochrane  
14 Handbook.[65]

### 34 ***Ensuring Interpretable Results***

35  
36 We will use a number of approaches to provide interpretable results from our meta-  
37 analyses. For studies that provide binary outcome measures, we will calculate relative  
38 risks (RRs) to inform relative effectiveness. To generate measures of absolute effect  
39 (risk differences), we will use estimates of baseline risk from the control arm of eligible  
40 RCTs.  
41  
42  
43  
44  
45  
46  
47  
48  
49

50  
51 When pooling across studies reporting continuous endpoints that use the same  
52 instrument, we will calculate the weighted mean difference (WMD), which maintains the  
53 original unit of measurement and represents the average difference between groups.  
54  
55  
56  
57  
58  
59  
60

1  
2  
3  
4  
5  
6  
7  
8  
9  
10  
11  
12  
13  
14  
15  
16  
17  
18  
19  
20  
21  
22  
23  
24  
25  
26  
27  
28  
29  
30  
31  
32  
33  
34  
35  
36  
37  
38  
39  
40  
41  
42  
43  
44  
45  
46  
47  
48  
49  
50  
51  
52  
53  
54  
55  
56  
57  
58  
59  
60

Once the WMD has been calculated, we will contextualize this value by noting the corresponding MID – the smallest change in instrument score that patients perceive is important. We will prioritize use of anchor-based MIDs when available, and calculate distribution-based MIDs when they are not. We will also divide WMDs by their corresponding MID to obtain estimates in MID units. However, contextualizing the WMD through the MID can be misleading; clinicians may mistakenly interpret any effect in MID units smaller than 1 as suggesting no patient obtains an important benefit, and any effect estimate greater than 1 as suggesting that all patients benefit, which is not accurate. Therefore, we will also calculate the proportion of patients who have benefited, i.e. demonstrated improvement greater than or equal to the MID in each trial, then aggregate the results across all studies.[70] Further, we will convert the proportion data to probabilities of experiencing benefit to calculate pooled RRs and numbers needed to treat (NNTs).

For trials that use different continuous outcome measures that address the same underlying construct, we will calculate the between-group difference in change scores (change from baseline) and divide this difference by the SD of the change. This calculation creates a measure of the effect (quantifying its magnitude in standard deviation units) called the standardized mean difference (SMD) that allows for comparison and pooling across trials.[65] However, the SMD is difficult to interpret and is vulnerable to the heterogeneity of patients that are enrolled: trials that enroll homogeneous study populations and thus have smaller standard deviations will generate a larger SMD than studies with more heterogeneous patient populations. To

1  
2  
3 address this issue, we will calculate the effect estimates in MID units by dividing  
4  
5 between-group difference in change scores by the MID. However, as with WMDs,  
6  
7 contextualizing the SMD in MID units can be misleading; therefore, we will, for each  
8  
9 trial, calculate the probability of experiencing a treatment effect greater than or equal to  
10  
11 the MID in the control and intervention groups, then pool the results to calculate RRs  
12  
13 and NNTs.[70]  
14  
15  
16  
17  
18  
19

### 20 ***Assessment of heterogeneity and subgroup analyses***

21  
22 We will conduct conventional meta-analyses (see above) for each paired comparison.  
23  
24 For each of these comparisons, we will examine heterogeneity using both a chi-squared  
25  
26 test and the  $I^2$  statistic – the percentage of variability that is due to true differences  
27  
28 between studies (heterogeneity) rather than sampling error (chance).[71, 72]  
29  
30  
31  
32  
33

34 We have generated five *a priori* hypotheses to explain variability between studies: (1)  
35  
36 subjective syndromes will show smaller treatment effects versus objectively diagnosed  
37  
38 syndromes; (2) trials comparing treatment to placebo will show larger treatment effects  
39  
40 than trials using active comparators; (3) trials that exclude patients who are receiving  
41  
42 disability benefits and/or involved in litigation will show larger treatment effects than  
43  
44 trials that include such patients; (4) chronic neuropathic pain syndromes defined by  
45  
46 peripheral nervous system lesions (e.g. diabetic neuropathy) will show larger effects  
47  
48 than central nervous system lesions (e.g. chronic post-stroke pain); (5) trials with higher  
49  
50 risk of bias will show larger treatment effects than trials with lower risk of bias; and, (6)  
51  
52 trials with longer follow-up times will show smaller treatment effects than trials with  
53  
54  
55  
56  
57  
58  
59  
60



1  
2  
3 shorter follow-up times. To inform our subgroup analyses based on risk of bias we will, if  
4  
5 we detect variability within the individual risk of bias components, perform subgroup  
6  
7 analyses on a component-by-component basis. We will perform meta-regression and  
8  
9 subgroup analyses to explore these hypotheses, and interpret the results in the context  
10  
11 of the GRADE system (see below).[73]  
12  
13

### 14 15 16 17 **Confidence in the estimates of effect**

18  
19 We will use the GRADE approach to evaluate confidence in effect estimates for all  
20  
21 reported outcomes.[74] GRADE has been adopted by over 70 organizations worldwide,  
22  
23 and this approach facilitates transparent, rigorous and comprehensive assessment of  
24  
25 evidence quality on a per outcome basis.[75-88] Our review of the management of  
26  
27 chronic neuropathic pain will be the first to use the GRADE criteria to evaluate  
28  
29 confidence in effect estimates. We will categorize the confidence in estimates (quality of  
30  
31 evidence) as high, moderate, low, or very low. Using this approach, randomized trials  
32  
33 begin as high quality evidence but may be rated down by one or more of four categories  
34  
35 of limitations. We will use GRADE guidance to determine whether to rate down  
36  
37 confidence in the body of evidence for: (1) risk of bias;[86] (2) for imprecision; [80] for  
38  
39 inconsistency;[82] and for publication bias.[83] For the risk of bias assessment, for any  
40  
41 comparisons that suggest a statistically significant treatment effect, we will use recently  
42  
43 developed approaches to address missing participant data for dichotomous outcomes  
44  
45 and continuous outcomes.[89, 90] When plausible worst case scenarios reverse the  
46  
47 treatment effect we will rate down for risk of bias. We will present the results of our  
48  
49  
50  
51  
52  
53  
54  
55  
56  
57  
58  
59  
60

1  
2  
3 meta-analyses in GRADE Evidence Profiles that will provide a succinct, easily digestible  
4 presentation of the risk of bias and magnitude of effects.[74]  
5  
6  
7  
8  
9

### 10 ***Multiple treatment comparison meta-analyses***

11  
12 To assess relative effects of competing treatments, we will construct a random effects  
13 model within the Bayesian framework using Markov chain Monte Carlo methods.[91]  
14  
15 We will use trace plots and calculate the Gelman-Rubin statistic to assess model  
16 convergence. We will model patient-important outcomes in every treatment group of  
17 every study, and specify the relations among the effect sizes across studies.[92] This  
18 method combines direct and indirect evidence for any given pair of treatments. We will  
19 use the resulting 95% credible intervals (CrIs) to assess the precision of treatment  
20 effects.[93] A key assumption behind multiple treatment comparison meta-analysis is  
21 that the analysed network is consistent or coherent, i.e. that direct and indirect evidence  
22 on the same comparisons do not disagree beyond chance. We will identify and estimate  
23 incoherence by employing a mixed treatment comparisons incoherence model in the  
24 Bayesian framework.[94] For each comparison, we will note the direct estimates and  
25 associated CIs from the previous analysis and calculate the indirect estimate using a  
26 node splitting procedure as well as the network estimate. We will conduct a statistical  
27 test for incoherence between the direct and the indirect estimate.  
28  
29  
30  
31  
32  
33  
34  
35  
36  
37  
38  
39  
40  
41  
42  
43  
44  
45  
46  
47  
48  
49  
50

51 We will have assessed confidence in estimates of effect from the direct comparisons in  
52 our pair-wise meta-analyses described previously. For rating confidence in the indirect  
53 comparisons, we will focus our assessments on first-order loops (that is, loops that are  
54  
55  
56  
57  
58  
59  
60

1  
2  
3 connected to the interventions of interest through only one other intervention; for  
4  
5 example A versus C and B versus C to estimate effects of A versus B) with the lowest  
6  
7 variances, and thus contribute the most to the estimates of effect. Within each loop, our  
8  
9 confidence in the indirect comparison will be the lowest of the confidence ratings we  
10  
11 have assigned to the contributing direct comparisons. For instance, if treatment A  
12  
13 versus C warrants high confidence and B versus C warrants moderate confidence, we  
14  
15 will judge the associated indirect comparison (A versus B) as warranting moderate  
16  
17 confidence. We may rate down confidence in the indirect comparisons further if we have  
18  
19 a strong suspicion that the transitivity assumption (i.e. the assumption that there are no  
20  
21 effect modifiers - such as differences in patients, extent to which interventions have  
22  
23 been optimally administered, differences in the comparator, and differences in how the  
24  
25 outcome has been measured - in the two direct comparisons that may bias the indirect  
26  
27 estimate) has been violated.  
28  
29  
30  
31  
32  
33  
34  
35

36 Our overall judgement of confidence in the network estimate for any paired comparison  
37  
38 will be the higher of the confidence rating amongst the contributing direct and indirect  
39  
40 comparisons. However, we may rate down confidence in the network estimate if we find  
41  
42 that the direct and indirect estimates are incoherent.  
43  
44  
45  
46  
47

48 As a secondary analysis, we will rank the interventions using the SUCRA (surface under  
49  
50 the cumulative ranking) method.[95] The SUCRA rankings may be misleading if there is  
51  
52 only evidence warranting low confidence for most comparisons; if the evidence  
53  
54 supporting the higher ranked interventions warrants lower confidence than the evidence  
55  
56  
57  
58  
59  
60

1  
2  
3 supporting the lower ranked interventions; or if the magnitude of effect is very similar in  
4  
5 higher versus lower ranked comparisons. We will consider these issues in interpreting  
6  
7 the SUCRA rankings.  
8  
9  
10  
11  
12  
13  
14  
15  
16  
17  
18  
19  
20  
21  
22  
23  
24  
25  
26  
27  
28  
29  
30  
31  
32  
33  
34  
35  
36  
37  
38  
39  
40  
41  
42  
43  
44  
45  
46  
47  
48  
49  
50  
51  
52  
53  
54  
55  
56  
57  
58  
59  
60

For peer review only

## DISCUSSION

With the established high prevalence of chronic neuropathic pain worldwide, the associated high socioeconomic burden, and the paucity of evidence on the comparative effectiveness of treatment options, there is an urgent and critical need for a high-quality systematic review to inform evidence-based management of chronic neuropathic pain.

Our proposed review has several strengths in relation to existing reviews. First, we will include all non-pharmacological and pharmacological treatment options for all chronic neuropathic pain syndromes. It is plausible that individual pain syndromes, in general, respond similarly to similar interventions, and thus by pooling across individual syndromes, it may be possible to provide a more precise estimate of treatment effect. In addition, examining all therapies for all chronic neuropathic pain syndromes would provide comprehensive guidance for management of chronic neuropathic pain, which increases utility to health care providers, patients, and payers. Second, we will update the search to present date, explore a wider range of literature databases than existing reviews, and include eligible articles in all languages. Third, we will make all subjective decisions, including determining trial eligibility and collecting data, in teams of reviewers, independently and in duplicate, with assessments of the reproducibility of judgments. Fourth, we will focus on collecting patient-important outcomes across IMMPACT-recommended core domains. Fifth, we will use the GRADE approach to evaluate our confidence in treatment effects. Sixth, we will ensure interpretability by presenting both risk differences and measures of relative effect for all outcomes

1  
2  
3 reported, and by presenting our findings with GRADE Evidence Profiles. Seventh, we  
4  
5 will generate a limited number of *a priori* subgroup hypotheses to explain heterogeneity  
6  
7 of pooled estimates of treatment effect, and conduct meta-regression and subgroup  
8  
9 analyses consistent with best current practices.  
10  
11

12  
13  
14  
15 As with existing reviews, the results of our proposed systematic review will be limited by  
16  
17 possible shortcomings of the primary studies, including presence of publication bias,  
18  
19 high heterogeneity, and poor quality of reporting and methodological rigor. Another  
20  
21 likely limitation, unique to multiple treatment comparison meta-analyses, will be the  
22  
23 nature of available treatment comparisons to build robust networks for our analyses.  
24  
25  
26

27  
28  
29 The findings of our review will help inform patients with chronic neuropathic pain about  
30  
31 their therapeutic options, so that they can make more autonomous health management  
32  
33 decisions. In addition, to help educate clinicians responsible for managing such  
34  
35 patients, our review will facilitate updating clinical practice guidelines for the  
36  
37 management of chronic neuropathic pain.  
38  
39  
40  
41  
42  
43  
44  
45  
46  
47  
48  
49  
50  
51  
52  
53  
54  
55  
56  
57  
58  
59  
60

## FOOTNOTES

**Funding:** This systematic review is supported by the Canadian Anesthesia Research Foundation and the Canadian Institutes of Health Research.

**Contributors:** All authors made substantial contributions to conception and design. SMM drafted the article, and DNB, DEM, RC, ZI, AA, AP, LW, SMK, AT, VM, DIS, LT, GHG, and JWB revised it critically for important intellectual content. All authors provided final approval of the version to be published.

**Competing Interests:** DEM and AP are chair and member, respectively, of the Canadian Pain Society Guideline Committee for management of chronic neuropathic pain. DEM has received research grant funding from Pfizer Canada, and has received honoraria for educational presentations from Jansenn-Ortho, Lilly, Purdue Pharma and Merck-Frosst. All other authors report no conflicts of interest.

**Acronyms:** Crls: Credible intervals; GRADE: Grading of Recommendations, Assessment, Development and Evaluation; IMMPACT: Initiative on Methods, Measurement, and Pain Assessment in Clinical Trials; MD: Mean difference; MID: Minimally important difference; PRISMA: Preferred Reporting Items for Systematic Reviews and Meta-Analyses; RCTs: Randomized controlled trials; RR: Relative risk; SD: Standard deviation; SE: Standard error; SMD: Standardized mean difference; SUCRA: surface under the cumulative ranking; WMD: Weighted mean difference

## REFERENCES

1. Treede R-D, Jensen TS, Campbell J, Cruccu G, Dostrovsky J, Griffin J, Hansson P, Hughes R, Nurmikko T, Serra J: **Neuropathic pain Redefinition and a grading system for clinical and research purposes.** *Neurology* 2008, **70**:1630-1635.
2. Baron R, Förster M, Binder A: **Subgrouping of patients with neuropathic pain according to pain-related sensory abnormalities: a first step to a stratified treatment approach.** *The Lancet Neurology* 2012, **11**:999-1005.
3. Meyer H: **Neuropathic pain-Current concepts.** *South African Family Practice* 2008, **50**:40-49.
4. Gilron I, Watson CPN, Cahill CM, Moulin DE: **Neuropathic pain: a practical guide for the clinician.** *Canadian Medical Association Journal* 2006, **175**:265-275.
5. O'Donnell MJ, Diener HC, Sacco RL, Panju AA, Vinisko R, Yusuf S: **Chronic pain syndromes after ischemic stroke: PROFESS trial.** *Stroke* 2013, **44**:1238-1243.
6. Attal N: **Neuropathic pain: mechanisms, therapeutic approach, and interpretation of clinical trials.** *Continuum (Minneapolis, Minn)* 2012, **18**:161-175.
7. van Hecke O, Austin SK, Khan RA, Smith BH, Torrance N: **Neuropathic pain in the general population: A systematic review of epidemiological studies.** *Pain* 2014, **155**:654-662.
8. Doth AH, Hansson PT, Jensen MP, Taylor RS: **The burden of neuropathic pain: a systematic review and meta-analysis of health utilities.** *Pain* 2010, **149**:338-344.
9. McDermott AM, Toelle TR, Rowbotham DJ, Schaefer CP, Dukes EM: **The burden of neuropathic pain: results from a cross-sectional survey.** *European journal of pain (London, England)* 2006, **10**:127-135.
10. Attal N, Lanteri-Minet M, Laurent B, Fermanian J, Bouhassira D: **The specific disease burden of neuropathic pain: results of a French nationwide survey.** *Pain* 2011, **152**:2836-2843.
11. Langley PC, Van Litsenburg C, Cappelleri JC, Carroll D: **The burden associated with neuropathic pain in Western Europe.** *Journal of medical economics* 2013, **16**:85-95.
12. Tarride J, Collet J, Choiniere M, Rousseau C, Gordon A: **The economic burden of neuropathic pain in Canada.** *Journal of medical economics* 2006, **9**:55-68.
13. Berger A, Dukes EM, Oster G: **Clinical characteristics and economic costs of patients with painful neuropathic disorders.** *The journal of pain : official journal of the American Pain Society* 2004, **5**:143-149.
14. Simpson EL, Duenas A, Holmes MW, Papaioannou D, Chilcott J: **Spinal cord stimulation for chronic pain of neuropathic or ischaemic origin: systematic review and economic evaluation.** *Health technology assessment (Winchester, England)* 2009, **13**:iii, ix-x, 1-154.



15. Liu H, Li H, Xu M, Chung KF, Zhang SP: **A systematic review on acupuncture for trigeminal neuralgia.** *Alternative therapies in health and medicine* 2010, **16**:30-35.
16. Pittler MH, Ernst E: **Complementary therapies for neuropathic and neuralgic pain: systematic review.** *The Clinical journal of pain* 2008, **24**:731-733.
17. Wetering EJ, Lemmens KM, Nieboer AP, Huijsman R: **Cognitive and behavioral interventions for the management of chronic neuropathic pain in adults--a systematic review.** *European journal of pain (London, England)* 2010, **14**:670-681.
18. Saarto T, Wiffen PJ: **Antidepressants for neuropathic pain.** *Cochrane database of systematic reviews (Online)* 2007:CD005454.
19. Goodyear-Smith F, Halliwell J: **Anticonvulsants for neuropathic pain: gaps in the evidence.** *The Clinical journal of pain* 2009, **25**:528-536.
20. Eisenberg E, McNicol E, Carr DB: **Opioids for neuropathic pain.** *Cochrane database of systematic reviews (Online)* 2006:CD006146.
21. Sauzet O, Williams JE, Ross J, Branford R, Farquhar-Smith P, Griffith GL, Fox-Rushby JA, Peacock JL: **The Characteristics and Quality of Randomized Controlled Trials in Neuropathic Pain: A Descriptive Study Based on a Systematic Review.** *The Clinical journal of pain* 2012.
22. Hearn L, Derry S, Moore RA: **Lacosamide for neuropathic pain and fibromyalgia in adults.** *Cochrane database of systematic reviews (Online)* 2012, **2**:CD009318.
23. Derry S, Moore RA: **Topical capsaicin (low concentration) for chronic neuropathic pain in adults.** *Cochrane database of systematic reviews (Online)* 2012, **9**:CD010111.
24. Gill D, Derry S, Wiffen PJ, Moore RA: **Valproic acid and sodium valproate for neuropathic pain and fibromyalgia in adults.** *Cochrane database of systematic reviews (Online)* 2011:CD009183.
25. Moore RA, Wiffen PJ, Derry S, McQuay HJ: **Gabapentin for chronic neuropathic pain and fibromyalgia in adults.** *Cochrane database of systematic reviews (Online)* 2011:CD007938.
26. Wiffen PJ, Derry S, Moore RA, McQuay HJ: **Carbamazepine for acute and chronic pain in adults.** *Cochrane database of systematic reviews (Online)* 2011:CD005451.
27. Chen N, Yang M, He L, Zhang D, Zhou M, Zhu C: **Corticosteroids for preventing postherpetic neuralgia.** *Cochrane database of systematic reviews (Online)* 2010:CD005582.
28. Collins S, Sigtermans MJ, Dahan A, Zuurmond WW, Perez RS: **NMDA receptor antagonists for the treatment of neuropathic pain.** *Pain medicine (Malden, Mass)* 2010, **11**:1726-1742.
29. Lunn MP, Hughes RA, Wiffen PJ: **Duloxetine for treating painful neuropathy or chronic pain.** *Cochrane database of systematic reviews (Online)* 2009:CD007115.
30. Leung A, Donohue M, Xu R, Lee R, Lefaucheur JP, Khedr EM, Saitoh Y, Andre-Obadia N, Rollnik J, Wallace M, Chen R: **rTMS for suppressing neuropathic**

- 1  
2  
3  
4  
5  
6  
7  
8  
9  
10  
11  
12  
13  
14  
15  
16  
17  
18  
19  
20  
21  
22  
23  
24  
25  
26  
27  
28  
29  
30  
31  
32  
33  
34  
35  
36  
37  
38  
39  
40  
41  
42  
43  
44  
45  
46  
47  
48  
49  
50  
51  
52  
53  
54  
55  
56  
57  
58  
59  
60
- pain: a meta-analysis.** *The journal of pain : official journal of the American Pain Society* 2009, **10**:1205-1216.
31. Khaliq W, Alam S, Puri N: **Topical lidocaine for the treatment of postherpetic neuralgia.** *Cochrane database of systematic reviews (Online)* 2007:CD004846.
32. Vargas-Espinosa ML, Sanmarti-Garcia G, Vazquez-Delgado E, Gay-Escoda C: **Antiepileptic drugs for the treatment of neuropathic pain: a systematic review.** *Medicina oral, patologia oral y cirugia bucal* 2012, **17**:e786-793.
33. Tremont-Lukats IW, Challapalli V, McNicol ED, Lau J, Carr DB: **Systemic administration of local anesthetics to relieve neuropathic pain: a systematic review and meta-analysis.** *Anesthesia and analgesia* 2005, **101**:1738-1749.
34. Chaparro LE, Wiffen PJ, Moore RA, Gilron I: **Combination pharmacotherapy for the treatment of neuropathic pain in adults.** *Cochrane database of systematic reviews (Online)* 2012, **7**:Cd008943.
35. Derry S, Sven-Rice A, Cole P, Tan T, Moore RA: **Topical capsaicin (high concentration) for chronic neuropathic pain in adults.** *Cochrane database of systematic reviews (Online)* 2013, **2**:Cd007393.
36. Gaskell H, Moore RA, Derry S, Stannard C: **Oxycodone for neuropathic pain and fibromyalgia in adults.** *Cochrane database of systematic reviews (Online)* 2014, **6**:Cd010692.
37. Hearn L, Derry S, Phillips T, Moore RA, Wiffen PJ: **Imipramine for neuropathic pain in adults.** *Cochrane database of systematic reviews (Online)* 2014, **5**:Cd010769.
38. Moore RA, Derry S, Aldington D, Cole P, Wiffen PJ: **Amitriptyline for neuropathic pain and fibromyalgia in adults.** *Cochrane database of systematic reviews (Online)* 2012, **12**:Cd008242.
39. Moore RA, Wiffen PJ, Derry S, Toelle T, Rice AS: **Gabapentin for chronic neuropathic pain and fibromyalgia in adults.** *Cochrane database of systematic reviews (Online)* 2014, **4**:Cd007938.
40. Straube S, Derry S, Moore RA, Cole P: **Cervico-thoracic or lumbar sympathectomy for neuropathic pain and complex regional pain syndrome.** *Cochrane database of systematic reviews (Online)* 2013, **9**:Cd002918.
41. Wiffen PJ, Derry S, Lunn MP, Moore RA: **Topiramate for neuropathic pain and fibromyalgia in adults.** *Cochrane database of systematic reviews (Online)* 2013, **8**:Cd008314.
42. Wiffen PJ, Derry S, Moore RA: **Lamotrigine for chronic neuropathic pain and fibromyalgia in adults.** *Cochrane database of systematic reviews (Online)* 2013, **12**:Cd006044.
43. Wiffen PJ, Derry S, Moore RA, Aldington D, Cole P, Rice AS, Lunn MP, Hamunen K, Haanpaa M, Kalso EA: **Antiepileptic drugs for neuropathic pain and fibromyalgia - an overview of Cochrane reviews.** *Cochrane database of systematic reviews (Online)* 2013, **11**:Cd010567.
44. Wiffen PJ, Derry S, Moore RA, Kalso EA: **Carbamazepine for chronic neuropathic pain and fibromyalgia in adults.** *Cochrane database of systematic reviews (Online)* 2014, **4**:Cd005451.

- 1
  - 2
  - 3
  - 4
  - 5
  - 6
  - 7
  - 8
  - 9
  - 10
  - 11
  - 12
  - 13
  - 14
  - 15
  - 16
  - 17
  - 18
  - 19
  - 20
  - 21
  - 22
  - 23
  - 24
  - 25
  - 26
  - 27
  - 28
  - 29
  - 30
  - 31
  - 32
  - 33
  - 34
  - 35
  - 36
  - 37
  - 38
  - 39
  - 40
  - 41
  - 42
  - 43
  - 44
  - 45
  - 46
  - 47
  - 48
  - 49
  - 50
  - 51
  - 52
  - 53
  - 54
  - 55
  - 56
  - 57
  - 58
  - 59
  - 60
45. Wiffen PJ, Derry S, Moore RA, Lunn MP: **Levetiracetam for neuropathic pain in adults**. *Cochrane database of systematic reviews (Online)* 2014, **7**:Cd010943.
46. Edelsberg JS, Lord C, Oster G: **Systematic review and meta-analysis of efficacy, safety, and tolerability data from randomized controlled trials of drugs used to treat postherpetic neuralgia**. *The Annals of pharmacotherapy* 2011, **45**:1483-1490.
47. Zakrzewska JM, Akram H: **Neurosurgical interventions for the treatment of classical trigeminal neuralgia**. *Cochrane database of systematic reviews (Online)* 2011:CD007312.
48. Yang M, Zhou M, He L, Chen N, Zakrzewska JM: **Non-antiepileptic drugs for trigeminal neuralgia**. *Cochrane database of systematic reviews (Online)* 2011:CD004029.
49. van Alfen N, van Engelen BG, Hughes RA: **Treatment for idiopathic and hereditary neuralgic amyotrophy (brachial neuritis)**. *Cochrane database of systematic reviews (Online)* 2009:CD006976.
50. Griebeler ML, Tsapas A, Brito JP, Wang Z, Phung OJ, Montori VM, Murad MH: **Pharmacologic interventions for painful diabetic neuropathy: an umbrella systematic review and comparative effectiveness network meta-analysis (Protocol)**. *Systematic reviews* 2012, **1**:61.
51. Wong MC, Chung JW, Wong TK: **Effects of treatments for symptoms of painful diabetic neuropathy: systematic review**. *BMJ (Clinical research ed)* 2007, **335**:87.
52. Snedecor SJ, Sudharshan L, Cappelleri JC, Sadosky A, Mehta S, Botteman M: **Systematic Review and Meta-Analysis of Pharmacological Therapies for Painful Diabetic Peripheral Neuropathy**. *Pain practice : the official journal of World Institute of Pain* 2013.
53. Xia L, Zhong J, Zhu J, Wang YN, Dou NN, Liu MX, Visocchi M, Li ST: **Effectiveness and Safety of Microvascular Decompression Surgery for Treatment of Trigeminal Neuralgia: A Systematic Review**. *The Journal of craniofacial surgery* 2014.
54. Rudroju N, Bansal D, Talakokkula ST, Gudala K, Hota D, Bhansali A, Ghai B: **Comparative efficacy and safety of six antidepressants and anticonvulsants in painful diabetic neuropathy: a network meta-analysis**. *Pain physician* 2013, **16**:E705-714.
55. Ney JP, Devine EB, Watanabe JH, Sullivan SD: **Comparative efficacy of oral pharmaceuticals for the treatment of chronic peripheral neuropathic pain: meta-analysis and indirect treatment comparisons**. *Pain medicine (Malden, Mass)* 2013, **14**:706-719.
56. Selph S, Carson S, Fu R, Thakurta S, Low A, McDonagh M: *Drug Class Review: Neuropathic Pain: Final Update 1 Report*. Portland OR: 2011 by Oregon Health & Science University.; 2011.
57. Berger VW: **Is the Jadad score the proper evaluation of trials?** *The Journal of rheumatology* 2006, **33**:1710-1711; author reply 1711-1712.
58. **Systematic Review of Quality Assessment Instruments for Randomized Control Trials: Selection of SIGN50 Methodological Checklist**  
[\[http://www.imbi.uni-freiburg.de/OJS/cca/index.php/cca/article/view/5053\]](http://www.imbi.uni-freiburg.de/OJS/cca/index.php/cca/article/view/5053)

- 1  
2  
3 59. Busse JW, Bruno P, Malik K, Connell G, Torrance D, Ngo T, Kirmayr K, Avrahami D, Riva JJ, Ebrahim S, et al: **An efficient strategy allowed English-speaking reviewers to identify foreign-language articles eligible for a systematic review.** *Journal of clinical epidemiology* 2014, **67**:547-553.
- 4  
5  
6  
7  
8 60. Landis JR, Koch GG: **The measurement of observer agreement for categorical data.** *Biometrics* 1977, **33**:159-174.
- 9  
10 61. Turk DC, Dworkin RH, Allen RR, Bellamy N, Brandenburg N, Carr DB, Cleeland C, Dionne R, Farrar JT, Galer BS, et al: **Core outcome domains for chronic pain clinical trials: IMMPACT recommendations.** *Pain* 2003, **106**:337-345.
- 11  
12  
13 62. Turk DC, Dworkin RH, Revicki D, Harding G, Burke LB, Cella D, Cleeland CS, Cowan P, Farrar JT, Hertz S, et al: **Identifying important outcome domains for chronic pain clinical trials: an IMMPACT survey of people with pain.** *Pain* 2008, **137**:276-285.
- 14  
15  
16  
17 63. Ioannidis JP, Lau J: **Completeness of safety reporting in randomized trials: an evaluation of 7 medical areas.** *JAMA : the journal of the American Medical Association* 2001, **285**:437-443.
- 18  
19  
20  
21 64. Akl EA, Sun X, Busse JW, Johnston BC, Briel M, Mulla S, You JJ, Bassler D, Lamontagne F, Vera C, et al: **Specific instructions for estimating unclearly reported blinding status in randomized trials were reliable and valid.** *Journal of clinical epidemiology* 2012, **65**:262-267.
- 22  
23  
24  
25  
26 65. Higgins JP, Green S: **Cochrane Handbook for Systematic Reviews of Interventions, Version [5.1.0] (updated March 2011).** In *Book Cochrane Handbook for Systematic Reviews of Interventions, Version [5.1.0] (updated March 2011)* (Editor ed.^eds.). City: The Cochrane Collaboration [2011].
- 27  
28  
29  
30 66. DerSimonian R, Laird N: **Meta-analysis in clinical trials.** *Controlled clinical trials* 1986, **7**:177-188.
- 31  
32  
33  
34 67. Cornell JE, Mulrow CD, Localio R, Stack CB, Meibohm AR, Guallar E, Goodman SN: **Random-Effects Meta-analysis of Inconsistent Effects: A Time for Change.** *Annals of internal medicine* 2014, **160**:267-270-270.
- 35  
36  
37 68. Brockwell SE, Gordon IR: **A comparison of statistical methods for meta-analysis.** *Statistics in medicine* 2001, **20**:825-840.
- 38  
39  
40 69. Guolo A: **Higher-order likelihood inference in meta-analysis and meta-regression.** *Statistics in medicine* 2012, **31**:313-327.
- 41  
42  
43 70. Thorlund K, Walter SD, Johnston BC, Furukawa TA, Guyatt GH: **Pooling health-related quality of life outcomes in meta-analysis—a tutorial and review of methods for enhancing interpretability.** *Research Synthesis Methods* 2011.
- 44  
45  
46 71. Higgins JP, Thompson SG: **Quantifying heterogeneity in a meta-analysis.** *Statistics in medicine* 2002, **21**:1539-1558.
- 47  
48  
49 72. Higgins JP, Thompson SG, Deeks JJ, Altman DG: **Measuring inconsistency in meta-analyses.** *BMJ (Clinical research ed)* 2003, **327**:557-560.
- 50  
51  
52 73. Altman DG, Bland JM: **Interaction revisited: the difference between two estimates.** *BMJ (Clinical research ed)* 2003, **326**:219.
- 53  
54  
55 74. Atkins D, Best D, Briss PA, Eccles M, Falck-Ytter Y, Flottorp S, Guyatt GH, Harbour RT, Haugh MC, Henry D, et al: **Grading quality of evidence and strength of recommendations.** *BMJ (Clinical research ed)* 2004, **328**:1490.
- 56  
57  
58  
59  
60

- 1  
2  
3  
4  
5  
6  
7  
8  
9  
10  
11  
12  
13  
14  
15  
16  
17  
18  
19  
20  
21  
22  
23  
24  
25  
26  
27  
28  
29  
30  
31  
32  
33  
34  
35  
36  
37  
38  
39  
40  
41  
42  
43  
44  
45  
46  
47  
48  
49  
50  
51  
52  
53  
54  
55  
56  
57  
58  
59  
60
75. Balshem H, Helfand M, Schunemann HJ, Oxman AD, Kunz R, Brozek J, Vist GE, Falck-Ytter Y, Meerpohl J, Norris S, Guyatt GH: **GRADE guidelines: 3. Rating the quality of evidence.** *Journal of clinical epidemiology* 2011, **64**:401-406.
76. Brunetti M, Shemilt I, Pregno S, Vale L, Oxman AD, Lord J, Sisk J, Ruiz F, Hill S, Guyatt GH, et al: **GRADE guidelines: 10. Considering resource use and rating the quality of economic evidence.** *Journal of clinical epidemiology* 2013, **66**:140-150.
77. Guyatt G, Oxman AD, Akl EA, Kunz R, Vist G, Brozek J, Norris S, Falck-Ytter Y, Glasziou P, DeBeer H, et al: **GRADE guidelines: 1. Introduction-GRADE evidence profiles and summary of findings tables.** *Journal of clinical epidemiology* 2011, **64**:383-394.
78. Guyatt G, Oxman AD, Sultan S, Brozek J, Glasziou P, Alonso-Coello P, Atkins D, Kunz R, Montori V, Jaeschke R, et al: **GRADE guidelines: 11. Making an overall rating of confidence in effect estimates for a single outcome and for all outcomes.** *Journal of clinical epidemiology* 2013, **66**:151-157.
79. Guyatt GH, Oxman AD, Kunz R, Atkins D, Brozek J, Vist G, Alderson P, Glasziou P, Falck-Ytter Y, Schunemann HJ: **GRADE guidelines: 2. Framing the question and deciding on important outcomes.** *Journal of clinical epidemiology* 2011, **64**:395-400.
80. Guyatt GH, Oxman AD, Kunz R, Brozek J, Alonso-Coello P, Rind D, Devereaux PJ, Montori VM, Freyschuss B, Vist G, et al: **GRADE guidelines 6. Rating the quality of evidence--imprecision.** *Journal of clinical epidemiology* 2011, **64**:1283-1293.
81. Guyatt GH, Oxman AD, Kunz R, Woodcock J, Brozek J, Helfand M, Alonso-Coello P, Falck-Ytter Y, Jaeschke R, Vist G, et al: **GRADE guidelines: 8. Rating the quality of evidence--indirectness.** *Journal of clinical epidemiology* 2011, **64**:1303-1310.
82. Guyatt GH, Oxman AD, Kunz R, Woodcock J, Brozek J, Helfand M, Alonso-Coello P, Glasziou P, Jaeschke R, Akl EA, et al: **GRADE guidelines: 7. Rating the quality of evidence--inconsistency.** *Journal of clinical epidemiology* 2011, **64**:1294-1302.
83. Guyatt GH, Oxman AD, Montori V, Vist G, Kunz R, Brozek J, Alonso-Coello P, Djulbegovic B, Atkins D, Falck-Ytter Y, et al: **GRADE guidelines: 5. Rating the quality of evidence--publication bias.** *Journal of clinical epidemiology* 2011, **64**:1277-1282.
84. Guyatt GH, Oxman AD, Santesso N, Helfand M, Vist G, Kunz R, Brozek J, Norris S, Meerpohl J, Djulbegovic B, et al: **GRADE guidelines: 12. Preparing summary of findings tables-binary outcomes.** *Journal of clinical epidemiology* 2013, **66**:158-172.
85. Guyatt GH, Oxman AD, Sultan S, Glasziou P, Akl EA, Alonso-Coello P, Atkins D, Kunz R, Brozek J, Montori V, et al: **GRADE guidelines: 9. Rating up the quality of evidence.** *Journal of clinical epidemiology* 2011, **64**:1311-1316.
86. Guyatt GH, Oxman AD, Vist G, Kunz R, Brozek J, Alonso-Coello P, Montori V, Akl EA, Djulbegovic B, Falck-Ytter Y, et al: **GRADE guidelines: 4. Rating the quality of evidence--study limitations (risk of bias).** *Journal of clinical epidemiology* 2011, **64**:407-415.

- 1  
2  
3  
4  
5  
6  
7  
8  
9  
10  
11  
12  
13  
14  
15  
16  
17  
18  
19  
20  
21  
22  
23  
24  
25  
26  
27  
28  
29  
30  
31  
32  
33  
34  
35  
36  
37  
38  
39  
40  
41  
42  
43  
44  
45  
46  
47  
48  
49  
50  
51  
52  
53  
54  
55  
56  
57  
58  
59  
60
87. Guyatt GH, Thorlund K, Oxman AD, Walter SD, Patrick D, Furukawa TA, Johnston BC, Karanickolas P, Akl EA, Vist G, et al: **GRADE guidelines: 13. Preparing summary of findings tables and evidence profiles-continuous outcomes.** *Journal of clinical epidemiology* 2013, **66**:173-183.
88. Andrews J, Guyatt G, Oxman AD, Alderson P, Dahm P, Falck-Ytter Y, Nasser M, Meerpohl J, Post PN, Kunz R, et al: **GRADE guidelines: 15. Going from evidence to recommendations: the significance and presentation of recommendations.** *Journal of clinical epidemiology* 2013.
89. Ebrahim S, Akl EA, Mustafa RA, Sun X, Walter SD, Heels-Ansdell D, Alonso-Coello P, Johnston BC, Guyatt GH: **Addressing continuous data for participants excluded from trial analysis: a guide for systematic reviewers.** *Journal of clinical epidemiology* 2013.
90. Akl EA, Johnston BC, Alonso-Coello P, Neumann I, Ebrahim S, Briel M, Cook DJ, Guyatt GH: **Addressing dichotomous data for participants excluded from trial analysis: a guide for systematic reviewers.** *PLoS One* 2013, **8**:e57132.
91. Ades AE, Sculpher M, Sutton A, Abrams K, Cooper N, Welton N, Lu G: **Bayesian methods for evidence synthesis in cost-effectiveness analysis.** *Pharmacoeconomics* 2006, **24**:1-19.
92. Salanti G, Higgins JP, Ades AE, Ioannidis JP: **Evaluation of networks of randomized trials.** *Statistical methods in medical research* 2008, **17**:279-301.
93. Sterne JA, Davey Smith G: **Sifting the evidence-what's wrong with significance tests?** *BMJ (Clinical research ed)* 2001, **322**:226-231.
94. Lu G, Ades A: **Assessing evidence inconsistency in mixed treatment comparisons.** *Journal of the American Statistical Association* 2006, **101**:447-459.
95. Salanti G, Ades AE, Ioannidis JP: **Graphical methods and numerical summaries for presenting results from multiple-treatment meta-analysis: an overview and tutorial.** *Journal of clinical epidemiology* 2011, **64**:163-171.

## Appendix 1: Proposed search strategy for MEDLINE

Database: Ovid MEDLINE(R) In-Process & Other Non-Indexed Citations, Ovid MEDLINE(R) Daily and Ovid MEDLINE(R) <1946 to Present>

[mp=title, abstract, original title, name of substance word, subject heading word, keyword heading word, protocol supplementary concept word, rare disease supplementary concept word, unique identifier]

### Search Strategy:

11 peripheral nervous system diseases/ or brachial plexus neuropathies/ or brachial plexus neuritis/ or complex regional pain syndromes/ or causalgia/ or reflex sympathetic dystrophy/ or diabetic neuropathies/ or giant axonal neuropathy/ or guillain-barre syndrome/ or mononeuropathies/ or femoral neuropathy/ or median neuropathy/ or peroneal neuropathies/ or radial neuropathy/ or sciatic neuropathy/ or sciatica/ or tibial neuropathy/ or tarsal tunnel syndrome/ or ulnar neuropathies/ or cubital tunnel syndrome/ or ulnar nerve compression syndromes/ or nerve compression syndromes/ or carpal tunnel syndrome/ or piriformis muscle syndrome/ or pudendal neuralgia/ or thoracic outlet syndrome/ or cervical rib syndrome/ or neuralgia/ or neuralgia, postherpetic/ or neuritis/ or polyneuropathies/ or alcoholic neuropathy/ or "hereditary sensory and motor neuropathy"/ or alstrom syndrome/ or charcot-marie-tooth disease/ or refsum disease/ or spastic paraplegia, hereditary/ or poems syndrome/ or polyradiculoneuropathy/ or polyradiculoneuropathy, chronic inflammatory demyelinating/ or polyradiculopathy/ or radiculopathy/ (92706)

2 exp central nervous system disease/ (1143738)

3 "autoimmune diseases of the nervous system"/ or myelitis, transverse/ or neuromyelitis optica/ or polyradiculoneuropathy/ or guillain-barre syndrome/ or "hereditary sensory and autonomic neuropathies"/ or polyradiculoneuropathy, chronic inflammatory demyelinating/ (10899)

4 Fabry Disease/ (2583)

5 Angiokeratoma/ (601)

6 Paraneoplastic Polyneuropathy/ (201)

7 Glossalgia/ (247)

8 Burning Mouth Syndrome/ (732)

9 Syringomyelia/ (3155)

10 Paroxysmal Hemicrania/ (75)

11 Trigeminal Autonomic Cephalalgias/ (105)

12 Phantom Limb/ (1528)

13 Thalamic Diseases/ (1103)

14 neuropath\*.mp. (102493)

15 mononeuropath\*.mp. (1492)

16 polyneuropath\*.mp. (13247)

17 polyradiculoneuropath\*.mp. (5027)

18 (Guillian adj Barre).mp. (87)

19 (Guillain adj Barre).mp. (7148)

1  
2  
3 20 (lewis adj sumner).mp. (49)  
4 21 (charcot adj marie adj tooth).mp. (3790)  
5 22 HMSN.mp. (432)  
6 23 Peroneal muscular atrophy.mp. (165)  
7 24 Guyon.ti,ab. (137)  
8 25 Pronator teres.mp. (270)  
9 26 (Struther\$ adj ligament).mp. (18)  
10 27 Wartenberg\$.mp. (116)  
11 28 Angiokeratoma.mp. (886)  
12 29 (Anderson adj Fabry).mp. (208)  
13 30 neuritis.mp. (13529)  
14 31 neuronopath\*.mp. (989)  
15 32 myelinopath\*.mp. (172)  
16 33 distal axonopath\*.mp. (229)  
17 34 HIV-DSP.mp. (15)  
18 35 Post-mastectomy pain.mp. (27)  
19 36 Phantom limb.mp. (1828)  
20 37 agnosia.mp. (2575)  
21 38 plexopathy.mp. (723)  
22 39 Radiculopathy.mp. (6164)  
23 40 Glossodynia.mp. (136)  
24 41 Stomatodynia.mp. (45)  
25 42 (transverse adj myelitis).mp. (1338)  
26 43 Fothergill\*.mp. (75)  
27 44 myelopath\*.mp. (9661)  
28 45 (Dejerine adj Roussy).mp. (37)  
29 46 Syringomyelia.mp. (3784)  
30 47 (Ramsay adj hunt).mp. (440)  
31 48 (ramsey adj hunt).mp. (23)  
32 49 sciatica.mp. (5358)  
33 50 exp Multiple Sclerosis/ (44211)  
34 51 exp Parkinsonian Disorders/ (58601)  
35 52 parkinson.mp. (61412)  
36 53 exp Stroke/ (85841)  
37 54 (post adj stroke).mp. (3958)  
38 55 thalamic\*.mp. (24137)  
39 56 exp Spinal Cord Injuries/ (37723)  
40 57 cauda equina/ (2816)  
41 58 cauda equina.mp. (4587)  
42 59 exp Ophthalmoplegia/ (9669)  
43 60 exp Herpes Zoster/ (9636)  
44 61 postherpetic.mp. (1800)  
45 62 Diabetic Neuropathies/ (12033)  
46 63 small fiber.mp. (716)  
47 64 exp HIV/ (84444)  
48 65 hiv.mp. (275179)  
49  
50  
51  
52  
53  
54  
55  
56  
57  
58  
59  
60



- 1  
2  
3 66 or/1-65 (1625784)  
4 67 neuropath\*.mp. (102493)  
5 68 neuralgi\*.mp. (18296)  
6 69 facial pain/ (5019)  
7 70 phantom limb/ (1528)  
8 71 phantom limb.mp. (1828)  
9 72 CRPS.ti,ab. (1390)  
10 73 CPSP.ti,ab. (157)  
11 74 burning mouth syndrome/ (732)  
12 75 dysesthe\*.ti,ab. (1613)  
13 76 (chronic adj2 pain).ti,ab. (31746)  
14 77 pain measurement/ (60773)  
15 78 or/67-77 (201452)  
16 79 66 and 78 (119454)  
17 80 Trigeminal Neuralgia/ (5540)  
18 81 Facial Neuralgia/ (1121)  
19 82 Facial Pain/ (5019)  
20 83 Glossalgia/ (247)  
21 84 Burning Mouth Syndrome/ (732)  
22 85 Trigeminal Autonomic Cephalalgias/ (105)  
23 86 neuralgia/ or neuralgia, postherpetic/ or piriformis muscle syndrome/ or pudendal  
24 neuralgia/ or sciatica/ (12818)  
25 87 neuralgi\*.mp. (18296)  
26 88 Post-mastectomy pain.mp. (27)  
27 89 postmastectomy pain syndrome.mp. (24)  
28 90 PMPS.mp. (406)  
29 91 Post-thoracotomy pain.mp. (234)  
30 92 Phantom limb.mp. (1828)  
31 93 agnosia.mp. (2575)  
32 94 Glossodynia.mp. (136)  
33 95 Stomatodynia.mp. (45)  
34 96 (tic adj do?lo?re?ux?).mp. (300)  
35 97 Prosopalgia.mp. (15)  
36 98 meralgia paresthetica.mp. (277)  
37 99 metatarsalgia.mp. (566)  
38 100 (Ramsay adj hunt).mp. (440)  
39 101 odontalgia.mp. (151)  
40 102 sciatica.mp. (5358)  
41 103 (Pain adj2 clinic).ti,ab. (1417)  
42 104 (chronic adj2 pain).ti,ab. (31746)  
43 105 (Neurogen\* adj2 pain).ti,ab. (429)  
44 106 low back pain/ (14091)  
45 107 or/80-106 (77534)  
46 108 79 or 107 (176257)  
47 109 (dh or dt or pc or rh or rt or su or th).fs. (5395344)  
48 110 exp Analgesia/ (31987)  
49  
50  
51  
52  
53  
54  
55  
56  
57  
58  
59  
60

1  
2  
3 111 exp Analgesics/ (433810)  
4 112 analges\*.mp. (140770)  
5 113 treat\*.mp. (4077132)  
6 114 therap\*.mp. (2410630)  
7 115 intervention\*.mp. (583724)  
8 116 manag\*.mp. (963377)  
9 117 or/109-116 (8422296)  
10 118 108 and 117 (104367)  
11 119 randomized controlled trial.pt. (376906)  
12 120 controlled clinical trial.pt. (88589)  
13 121 randomized.ab. (297403)  
14 122 placebo.ab. (155216)  
15 123 drug therapy.fs. (1709609)  
16 124 randomly.ab. (215113)  
17 125 trial.ab. (308899)  
18 126 groups.ab. (1367352)  
19 127 or/119-126 (3364472)  
20 128 exp animals/ not humans.sh. (3955572)  
21 129 127 not 128 (2886355)  
22 130 118 and 129 (36678)  
23 131 limit 130 to "therapy (maximizes sensitivity)" (30615)  
24 132 limit 131 to "review articles" (6311)  
25 133 131 not 132 (24304)  
26 134 Transcranial Magnetic Stimulation/ (6992)  
27 135 rts.mp. (2511)  
28 136 magnetics/tu (807)  
29 137 134 or 135 or 136 (8481)  
30 138 pain.mp. (480976)  
31 139 137 and 138 (542)  
32 140 133 or 139 (24765)  
33  
34  
35  
36  
37  
38  
39  
40  
41  
42  
43  
44  
45  
46  
47  
48  
49  
50  
51  
52  
53  
54  
55  
56  
57  
58  
59  
60

## Appendix 2: List of chronic neuropathic pain syndromes

- Central neuropathic pain
  - Parkinson disease-related pain
  - Compressive myelopathy from spinal stenosis
  - Post-traumatic spinal cord injury pain
  - Syringomyelia
  - HIV myelopathy
  - Multiple-sclerosis related pain
  - Post-ischemic myelopathy
  - Post-radiation myelopathy
  - Central post-stroke pain
    - Thalamic pain syndrome
    - Dejerine–Roussy syndrome
  - Transverse myelitis
- Peripheral neuropathic pain
  - Alcoholic neuropathy/polyneuropathy
  - Charcot-Marie-Tooth disease
    - Charcot-Marie-Tooth neuropathy
    - Hereditary motor and sensory neuropathy (HMSN)
    - Peroneal muscular atrophy (PMA)
  - Fabry disease (Fabry's disease, Anderson-Fabry disease, angiokeratoma corporis diffusum and alpha-galactosidase A deficiency)
  - Idiopathic sensory neuropathy
  - Nutritional deficiency-related neuropathies
    - Thiamine-deficiency neuropathy/beriberi neuropathy
  - Painful diabetic neuropathy
  - Abdominal migraine
  - Axillary neuropathy
  - Complex regional pain syndrome
    - Reflex sympathetic dystrophy
    - Causalgia
  - Entrapment neuropathies (nerve compression syndromes, compression neuropathy)
    - Anterior interosseous syndrome
    - Carpal tunnel syndrome
    - Cubital tunnel syndrome
    - Guyon's canal syndrome
    - Posterior interosseous neuropathy
    - Pronator teres syndrome
    - Radial neuropathy
    - Struthers' ligament syndrome
    - Wartenberg's Syndrome

- Nerve compression or infiltration by tumour
- Post-mastectomy pain
- Post-thoracotomy pain
- Post-surgical/post-operative neuropathic pain
- Phantom limb pain
- Radiculopathy (cervical, thoracic or lumbosacral)
- Post-traumatic neuralgia
- Meralgia paresthetica (neuropathy of the lateral femoral cutaneous nerve)
- Obturator neuralgia
- Femoral neuralgia
- Sciatic neuralgia
- Morton's neuralgia (interdigital metatarsalgia)
- Piriformis syndrome(technically a variation on sciatic)
- Cauda equina syndrome
- Post mastectomy pain is sometimes referred to (in the IASP taxonomy) as post mastectomy pain syndrome
- Post thoracotomy pain syndrome
- Internal mammary artery syndrome (post cardiac surgery Internal Mammary nerve neuralgia)
- Segmental or intercostal neuralgia
- Abdominal cutaneous nerve entrapment syndrome
- Neuralgias of the genitofemoral, ilioinguinal, iliohypogastric, or pudendal nerves
- Facial nerves - neuralgias associated with each and every nerve including the branches of the trigeminal (V1-2-3); 7th nerve (Ramsay Hunt syndrome); glossopharyngeal nerve
- Occipital neuralgias
- Painful ophthalmoplegia;
- Odontalgia
- Chronic paroxysmal hemicrania
- Thoracic outlet syndrome
- Acute and chronic inflammatory demyelinating polyradiculoneuropathy
  - Guillain–Barré syndrome
  - Lewis-Sumner syndrome
- Cancer-related neuropathy
  - Chemotherapy-induced peripheral neuropathy
  - Radiotherapy-induced peripheral neuropathy
- HIV-sensory neuropathy
  - HIV-associated distal sensory polyneuropathy (HIV-DSP)
- Postherpetic neuralgia
- Postradiation plexopathy
- Progressive inflammatory neuropathy
- Stomatodynia
  - Glossodynia
  - Burning mouth syndrome
- Toxic exposure-related neuropathies

- 1
- 2
- 3
- 4
- 5
- 6
- 7
- 8
- 9
- 10
- 11
- 12
- 13
- 14
- 15
- 16
- 17
- 18
- 19
- 20
- 21
- 22
- 23
- 24
- 25
- 26
- 27
- 28
- 29
- 30
- 31
- 32
- 33
- 34
- 35
- 36
- 37
- 38
- 39
- 40
- 41
- 42
- 43
- 44
- 45
- 46
- 47
- 48
- 49
- 50
- 51
- 52
- 53
- 54
- 55
- 56
- 57
- 58
- 59
- 60
- Trigeminal neuralgia (Tic douloureux)
  - Prosopalgia
  - Suicide disease
  - Fothergill's disease
- Vasculitic neuropathy
- Wartenberg's migratory sensory neuropathy

# BMJ Open

## Management of chronic neuropathic pain: a protocol for a multiple treatment comparison meta-analysis of randomized controlled trials

|                                 |                                                                                                                                                                                                                                                                                                                                                                                                                                                                                                                                                                                                                                                                                                                                                                                                                                                                                                                                                                                                                                                                                                                                                                                                                                                                                                                                                                                          |
|---------------------------------|------------------------------------------------------------------------------------------------------------------------------------------------------------------------------------------------------------------------------------------------------------------------------------------------------------------------------------------------------------------------------------------------------------------------------------------------------------------------------------------------------------------------------------------------------------------------------------------------------------------------------------------------------------------------------------------------------------------------------------------------------------------------------------------------------------------------------------------------------------------------------------------------------------------------------------------------------------------------------------------------------------------------------------------------------------------------------------------------------------------------------------------------------------------------------------------------------------------------------------------------------------------------------------------------------------------------------------------------------------------------------------------|
| Journal:                        | <i>BMJ Open</i>                                                                                                                                                                                                                                                                                                                                                                                                                                                                                                                                                                                                                                                                                                                                                                                                                                                                                                                                                                                                                                                                                                                                                                                                                                                                                                                                                                          |
| Manuscript ID:                  | bmjopen-2014-006112.R1                                                                                                                                                                                                                                                                                                                                                                                                                                                                                                                                                                                                                                                                                                                                                                                                                                                                                                                                                                                                                                                                                                                                                                                                                                                                                                                                                                   |
| Article Type:                   | Protocol                                                                                                                                                                                                                                                                                                                                                                                                                                                                                                                                                                                                                                                                                                                                                                                                                                                                                                                                                                                                                                                                                                                                                                                                                                                                                                                                                                                 |
| Date Submitted by the Author:   | 14-Oct-2014                                                                                                                                                                                                                                                                                                                                                                                                                                                                                                                                                                                                                                                                                                                                                                                                                                                                                                                                                                                                                                                                                                                                                                                                                                                                                                                                                                              |
| Complete List of Authors:       | Mulla, Sohail; McMaster University, Clinical Epidemiology & Biostatistics, HSC-2C7; Cleveland Clinic, Outcomes Research Consortium<br>Buckley, D; McMaster University, Anesthesia; McMaster University, Michael G. DeGroot Institute for Pain Research and Care<br>Moulin, Dwight; Western University, Clinical Neurological Sciences and Oncology<br>Couban, Rachel; McMaster University, Michael G. DeGroot Institute for Pain Research and Care<br>Izhar, Zain; McMaster University, Clinical Epidemiology & Biostatistics<br>Agarwal, Arnav; McMaster University, Clinical Epidemiology & Biostatistics<br>Panju, Akbar; McMaster University, Medicine; McMaster University, Michael G. DeGroot Institute for Pain Research and Care<br>Wang, Li; McMaster University, Anesthesia<br>Kallyth, Sun; McMaster University, Michael G. DeGroot Institute for Pain Research and Care<br>Turan, Alparslan; Cleveland Clinic, Outcomes Research<br>Montori, Victor; Mayo Clinic, Knowledge and Encounter Research Unit<br>Sessler, Daniel; Cleveland Clinic, Outcomes Research<br>Thabane, Lehana; McMaster University, Clinical Epidemiology & Biostatistics; McMaster University, Anesthesia<br>Guyatt, Gordon; McMaster University, Clinical Epidemiology and Biostatistics<br>Busse, Jason; McMaster University, Clinical Epidemiology & Biostatistics; McMaster University, Anesthesia |
| <b>Primary Subject Heading</b>: | Neurology                                                                                                                                                                                                                                                                                                                                                                                                                                                                                                                                                                                                                                                                                                                                                                                                                                                                                                                                                                                                                                                                                                                                                                                                                                                                                                                                                                                |
| Secondary Subject Heading:      | Anaesthesia, Patient-centred medicine, Medical management                                                                                                                                                                                                                                                                                                                                                                                                                                                                                                                                                                                                                                                                                                                                                                                                                                                                                                                                                                                                                                                                                                                                                                                                                                                                                                                                |
| Keywords:                       | Neurological pain < NEUROLOGY, Pain management < ANAESTHETICS, EPIDEMIOLOGY, STATISTICS & RESEARCH METHODS, Clinical trials < THERAPEUTICS                                                                                                                                                                                                                                                                                                                                                                                                                                                                                                                                                                                                                                                                                                                                                                                                                                                                                                                                                                                                                                                                                                                                                                                                                                               |
|                                 |                                                                                                                                                                                                                                                                                                                                                                                                                                                                                                                                                                                                                                                                                                                                                                                                                                                                                                                                                                                                                                                                                                                                                                                                                                                                                                                                                                                          |

SCHOLARONE™  
Manuscripts

1  
2  
3  
4  
5  
6  
7  
8  
9  
10  
11  
12  
13  
14  
15  
16  
17  
18  
19  
20  
21  
22  
23  
24  
25  
26  
27  
28  
29  
30  
31  
32  
33  
34  
35  
36  
37  
38  
39  
40  
41  
42  
43  
44  
45  
46  
47  
48  
49  
50  
51  
52  
53  
54  
55  
56  
57  
58  
59  
60

For peer review only

1  
2  
3 **Management of chronic neuropathic pain: a protocol for a multiple treatment**  
4 **comparison meta-analysis of randomized controlled trials**  
5  
6  
7  
8  
9  
10  
11  
12

13 Sohail M. Mulla, MSc<sup>\*1,2</sup> [mullasm@mcmaster.ca](mailto:mullasm@mcmaster.ca)  
14  
15 D. Norman Buckley, MD<sup>3,4</sup> [buckleyn@mcmaster.ca](mailto:buckleyn@mcmaster.ca)  
16  
17 Dwight E. Moulin, MD<sup>5</sup> [dwight.moulin@lhsc.on.ca](mailto:dwight.moulin@lhsc.on.ca)  
18  
19 Rachel Couban, MA, MSt<sup>4</sup> [rcouban@mcmaster.ca](mailto:rcouban@mcmaster.ca)  
20  
21 Zain Izhar<sup>1</sup> [izharmz@mcmaster.ca](mailto:izharmz@mcmaster.ca)  
22  
23 Arnav Agarwal, BHSc<sup>1</sup> [arnav.agarwal@learnlink.mcmaster.ca](mailto:arnav.agarwal@learnlink.mcmaster.ca)  
24  
25 Akbar Panju, MD<sup>4,6</sup> [panju@hhsc.ca](mailto:panju@hhsc.ca)  
26  
27 Li Wang, PhD<sup>3</sup> [lwang246@gmail.com](mailto:lwang246@gmail.com)  
28  
29 Sun Makosso Kallyth, PhD<sup>4</sup> [makossok@mcmaster.ca](mailto:makossok@mcmaster.ca)  
30  
31 Alparslan Turan, MD<sup>7</sup> [turana@ccf.org](mailto:turana@ccf.org)  
32  
33 Victor M. Montori, MD, MSc<sup>8</sup> [montori.victor@mayo.edu](mailto:montori.victor@mayo.edu)  
34  
35 Daniel I. Sessler, MD<sup>7</sup> [ds@or.org](mailto:ds@or.org)  
36  
37 Lehana Thabane, PhD<sup>1,3,9</sup> [thabanl@mcmaster.ca](mailto:thabanl@mcmaster.ca)  
38  
39 Gordon H. Guyatt, MD, MSc<sup>1,6</sup> [guyatt@mcmaster.ca](mailto:guyatt@mcmaster.ca)  
40  
41 Jason W. Busse, DC, PhD<sup>1,3,4</sup> [bussejw@mcmaster.ca](mailto:bussejw@mcmaster.ca)  
42  
43  
44  
45  
46  
47  
48  
49  
50  
51  
52  
53  
54  
55  
56  
57  
58  
59  
60

<sup>1</sup>Department of Clinical Epidemiology & Biostatistics, McMaster University, Hamilton,  
Ontario, Canada

<sup>2</sup>Outcomes Research Consortium, Cleveland, Ohio, United States



1  
2  
3 <sup>3</sup>Department of Anesthesia, McMaster University, Hamilton, Ontario, Canada

4  
5 <sup>4</sup>Michael G. DeGroot Institute for Pain Research and Care, McMaster University,  
6  
7  
8 Hamilton, Ontario, Canada

9  
10 <sup>5</sup>Departments of Clinical Neurological Sciences and Oncology, Western University,  
11  
12 London, Ontario, Canada

13  
14 <sup>6</sup>Department of Medicine, McMaster University, Hamilton, Ontario, Canada

15  
16  
17 <sup>7</sup>Department of Outcomes Research, Cleveland Clinic, Cleveland, Ohio, USA

18  
19  
20 <sup>8</sup>Knowledge and Evaluation Research Unit, Divisions of Endocrinology and Diabetes,  
21  
22 and Health Care & Policy Research, Mayo Clinic, Rochester, Minnesota, USA

23  
24 <sup>9</sup>Department of Pediatrics, McMaster University, Hamilton, Ontario, Canada

25  
26  
27  
28  
29 \*Corresponding author:

30  
31  
32 Sohail M. Mulla, MSc

33  
34 Department of Clinical Epidemiology & Biostatistics, HSC-2C7

35  
36  
37 McMaster University

38  
39 1280 Main Street West

40  
41  
42 Hamilton, Ontario, L8S 4K1

43  
44  
45 Canada

46  
47  
48 E-mail: [mullasm@mcmaster.ca](mailto:mullasm@mcmaster.ca)

## ABSTRACT

**Introduction:** Chronic neuropathic pain is associated with reduced health-related quality of life and substantial socioeconomic costs. Current research addressing management of chronic neuropathic pain is limited. No review has evaluated all interventional studies for chronic neuropathic pain, which limits attempts to make inferences regarding the relative effectiveness of treatments.

**Methods and analysis:** We will conduct a systematic review of all randomized controlled trials evaluating therapies for chronic neuropathic pain. We will identify eligible trials, in any language, by a systematic search of CINAHL, EMBASE, MEDLINE, AMED, HealthSTAR, DARE, PsychINFO, and the Cochrane Central Registry of Controlled Trials. Eligible trials will: (1) enrol patients presenting with chronic neuropathic pain, and (2) randomize patients to alternative interventions (pharmacological or non-pharmacological) or an intervention and a control arm. Pairs of reviewers will, independently and in duplicate, screen titles and abstracts of identified citations, review the full texts of potentially eligible trials, and extract information from eligible trials. We will use a modified Cochrane instrument to evaluate risk of bias of eligible studies, recommendations from the Initiative on Methods, Measurement, and Pain Assessment in Clinical Trials (IMMPACT) to inform the outcomes we will collect, and the Grading of Recommendations Assessment, Development and Evaluation (GRADE) system to evaluate our confidence in treatment effects. When possible, we will conduct: (1) in direct comparisons, a random-effects meta-analyses to establish the

1  
2  
3 effect of reported therapies on patient-important outcomes; and (2) a multiple treatment  
4 comparison meta-analysis within a Bayesian framework to assess the relative effects of  
5 treatments. We will define *a priori* hypotheses to explain heterogeneity between studies,  
6 and conduct meta-regression and subgroup analyses consistent with current best  
7 practices.  
8  
9  
10  
11  
12  
13  
14  
15  
16  
17

18 **Ethics and Dissemination:** We do not require ethics approval for our proposed review.  
19 We will disseminate our findings through peer-reviewed publications and conference  
20 presentations.  
21  
22  
23  
24  
25  
26

27 **Registration:** PROSPERO (CRD42014009212).  
28  
29  
30  
31  
32  
33  
34  
35  
36  
37  
38  
39  
40  
41  
42  
43  
44  
45  
46  
47  
48  
49  
50  
51  
52  
53  
54  
55  
56  
57  
58  
59  
60

## STRENGTHS AND LIMITATIONS

- Our broad study eligibility criteria will allow us to generate more precise estimates of treatment effects, thus increasing generalizability of our results.
- We will use the GRADE approach to evaluate our confidence in treatment effects, and the IMMPACT guidelines to inform the outcomes we will collect. No existing review on the topic has done so.
- We will ensure interpretability by presenting both risk differences and measures of relative effect for all outcomes reported, and by presenting our findings with GRADE Evidence Profiles. No existing review on the topic has done so.
- Our results will be limited by possible shortcomings of the primary studies.

## BACKGROUND

Chronic neuropathic pain is defined as “pain arising as a direct consequence of a lesion or disease affecting the somatosensory system.”[1] It may be classified as central or peripheral, depending on the site of the lesion.[2] Among the causes of chronic neuropathic pain are metabolic disease (e.g. diabetes), infection (e.g. shingles), trauma (e.g. spinal cord injury), and autoimmune disease (e.g. multiple sclerosis).[3-5] The pain may be spontaneous or evoked in response to physical stimuli. The latter may manifest as increased sensitivity to pain (hyperalgesia) or as a painful response to a stimulus that would not normally be painful (allodynia).[4, 6]

Chronic neuropathic pain is common worldwide, affecting 7% to 10% of the general population.[7] It is associated with depression, anxiety, and sleep disturbances, and patients with chronic neuropathic pain experience lower health-related quality of life than the general population.[8-11]

Chronic neuropathic pain is associated with substantial economic burden. Tarride et al. estimated that managing a Canadian patient with chronic neuropathic pain over a three-month period costs an average of \$2,567, of which 52% are direct costs, e.g. cost of physicians, diagnostic tests, and surgical procedures.[12] Others report that people suffering from chronic neuropathic pain generate medical costs that are three times greater than those not living with pain.[11, 13] In the United States alone, almost \$40

1  
2  
3 billion annually in health care, disability and related costs is attributed to chronic  
4  
5 neuropathic pain.[4]  
6  
7  
8  
9

10 The underlying mechanisms of chronic neuropathic pain are poorly understood, which  
11 complicates management. Both non-pharmacological and pharmacological treatments  
12 are currently used. A limited number of systematic reviews focus on non-  
13 pharmacological options, including electrical nerve stimulation,[14] acupuncture,[15, 16]  
14 and cognitive behavioural therapy [17]. Most report pharmacological treatments for  
15 chronic neuropathic pain, including antidepressants,[18] anticonvulsants,[19] and opioid  
16 analgesics.[20]  
17  
18  
19  
20  
21  
22  
23  
24  
25  
26  
27  
28

29 Significant gaps remain though. For example, randomized controlled trials (RCTs)  
30 exploring treatment for chronic neuropathic pain often compare pharmacological  
31 treatments against placebo and seldom against each other. Consequently, there are  
32 few direct comparisons among treatments. A recent systematic review found that  
33 among 131 RCTs published between 1969 and 2007 and addressing painful diabetic  
34 neuropathy and postherpetic neuralgia, both common types of peripheral neuropathic  
35 pain, only 25 studies (19%) compared drugs directly against each other.[21]  
36  
37  
38  
39  
40  
41  
42  
43  
44  
45  
46  
47

48 No review to date has systematically evaluated all evidence for management of chronic  
49 neuropathic pain; existing reviews focus on select therapies [18, 20, 22-46] or specific  
50 syndromes.[47-57] Additionally, risk of bias assessment of studies included in existing  
51 reviews has been variable, and authors often depended on instruments that have been  
52  
53  
54  
55  
56  
57  
58  
59  
60

1  
2  
3 criticized for being overly simplistic (e.g. Jadad system) and/or assessed risk of bias on  
4  
5 a per-study basis rather than overall for reported outcome.[58, 59] Furthermore,  
6  
7 strategies to identify studies have been limited, as authors used few search terms, they  
8  
9 did not search major literature databases, and/or they did not consider foreign language  
10  
11 studies – an approach that would have excluded 12% of eligible trials in a systematic  
12  
13 review of another chronic pain syndrome.[60] As well, none of the reviews employ the  
14  
15 Grading of Recommendations Assessment, Development and Evaluation (GRADE)  
16  
17 approach to evaluate the confidence in effect estimates (quality of evidence) for  
18  
19 reported outcomes. And finally, none of the existing reviews facilitate interpretability, for  
20  
21 instance, by presenting results in terms of minimally important differences (MID).  
22  
23  
24  
25  
26  
27  
28

29 The limitations of previous works suggests the need for a new systematic review to be  
30  
31 conducted using state-of-the-art methodology to inform evidence-based management of  
32  
33 chronic neuropathic pain. We thus plan a systematic review and multiple treatment  
34  
35 comparison meta-analysis of therapies for chronic neuropathic pain.  
36  
37  
38  
39  
40  
41  
42  
43  
44  
45  
46  
47  
48  
49  
50  
51  
52  
53  
54  
55  
56  
57  
58  
59  
60

## METHODS

### ***Standardized Reporting***

Our paper will conform to the Preferred Reporting Items for Systematic Reviews and Meta-Analyses (PRISMA) guidelines for reporting systematic reviews of RCTs.

### ***Protocol Registration***

Our protocol is registered on PROSPERO (registration number: CRD42014009212).

### ***Search Strategy***

We will identify relevant RCTs, in any language, by a systematic search of CINAHL, EMBASE, MEDLINE, AMED, HealthSTAR, DARE, PsychINFO, PapersFirst, ProceedingsFirst, and the Cochrane Central Registry of Controlled Trials, from the inception of each database. Our search will be refined for individual databases by a highly experienced medical librarian (RC) [Appendix 1 is a proposed search strategy for MEDLINE]. Reviewers will scan the bibliographies of all retrieved trials and other relevant publications, including reviews and meta-analyses, for additional relevant articles.

### ***Eligibility criteria and their application to potentially eligible articles***

Using standardized forms, reviewers trained in health research methodology will work in pairs to screen, independently and in duplicate, titles and abstracts of identified citations and acquire the full text publication of articles that both reviewers judge as potentially



1  
2  
3 eligible. Using a standardized form, the same reviewer teams will independently apply  
4  
5 eligibility criteria to the full text of potentially eligible trials. We will measure agreement  
6  
7 between reviewers to assess the reliability of full-text review using the guidelines  
8  
9 proposed by Landis and Koch.[61] Specifically, we will calculate Kappa values, and  
10  
11 interpret them using the following thresholds: <0.20 as slight agreement, 0.21-0.40 as  
12  
13 fair agreement, 0.41-0.60 as moderate agreement, 0.61-0.80 as substantial agreement,  
14  
15 and >0.80 as almost perfect agreement. Eligible trials will: (1) enrol patients presenting  
16  
17 with chronic neuropathic pain [Appendix 2 lists all syndromes we are studying], and (2)  
18  
19 randomize patients to alternative interventions (pharmacological or non-  
20  
21 pharmacological) or to an intervention and control arm.  
22  
23  
24  
25  
26  
27  
28

### 29 ***Data Abstraction and Analysis***

30  
31 Before starting data abstraction, we will conduct calibration exercises to ensure  
32  
33 consistency between reviewers. Teams of reviewers will extract data independently and  
34  
35 in duplicate from each eligible study using standardized forms and a detailed instruction  
36  
37 manual to inform tailoring of an online data abstraction program, DistillerSR  
38  
39 (<http://systematic-review.net/>). We will extract data regarding patient demographics, trial  
40  
41 methodology, intervention details, and outcome data guided by the Initiative on  
42  
43 Methods, Measurement, and Pain Assessment in Clinical Trials (IMMPACT).[62, 63]  
44  
45 Specifically, we will collect outcome data across the following nine IMMPACT-  
46  
47 recommended core outcome domains: (1) pain; (2) physical functioning; (3) emotional  
48  
49 functioning; (4) participant ratings of improvement and satisfaction with treatment; (5)  
50  
51 symptoms and adverse events; (6) participation disposition; (7) role functioning; (8)  
52  
53  
54  
55  
56  
57  
58  
59  
60

1  
2  
3 Interpersonal functioning; and (9) sleep and fatigue. We will collect data for all adverse  
4  
5 outcomes as guided by Ioannidis and Lau.[64] We will resolve disagreements by  
6  
7 discussion to achieve consensus.  
8  
9

### 10 11 12 ***Evaluating risk of bias in individual studies***

13  
14 Reviewers will assess risk of bias using a modified Cochrane risk of bias instrument that  
15  
16 includes response options of “definitely or probably yes” – assigned a low risk of bias –  
17  
18 or “definitely or probably no” – assigned a high risk of bias, an approach we have  
19  
20 previously shown to be valid.[65] We will evaluate sequence generation, allocation  
21  
22 sequence concealment; blinding of participants and study personnel; and, incomplete  
23  
24 outcome data.[66] We will resolve any disagreements between reviewers by discussion.  
25  
26 We will contact study authors if limitations in reporting lead to uncertainties in eligibility,  
27  
28 risk of bias, or outcome.  
29  
30  
31  
32  
33  
34  
35

### 36 37 ***Direct comparisons meta-analyses***

38  
39 In comparison to fixed effect models, random effect models are conservative in that they  
40  
41 consider both within- and among-study variability. Recent methodological research has  
42  
43 shown that while popular, the DerSimonian–Laird method [67] can produce narrow  
44  
45 confidence intervals when the number of studies is small or when they are substantively  
46  
47 heterogeneous.[68, 69] Therefore, to pool outcome data for trials that make direct  
48  
49 comparisons between interventions and alternatives, we will use the likelihood profile  
50  
51 approach.[70] We will pool cross-over trials with parallel design RCTs using methods  
52  
53 outlined in the Cochrane handbook to derive effect estimates.[66] Specifically, we will  
54  
55  
56  
57  
58  
59  
60

1  
2  
3 perform a paired t-test for each crossover trial if any of the following are available: (1)  
4 the individual participant data; (2) the mean and standard deviation (SD) or standard  
5 error (SE) of the participant-specific differences and between the intervention and  
6 control measurement; (3) the mean difference (MD) and one of the following: (i) a t-  
7 statistic from a paired t-test; (ii) a P value from a paired t-test; (iii) a confidence interval  
8 from a paired analysis; or (4) a graph of measurements of the intervention arm and  
9 control arm from which we can extract individual data values, so long as the matched  
10 measurement for each individual can be identified.[66] If these data are not available,  
11 we will approximate paired analyses by calculating the MDs and the corresponding SEs  
12 for the paired analyses.[66] If the SE or SD of within-participant differences are not  
13 available, we will impute the SD using the methods outlined in the Cochrane  
14 Handbook.[66]

### 34 ***Ensuring Interpretable Results***

35  
36 We will use a number of approaches to provide interpretable results from our meta-  
37 analyses. For studies that provide binary outcome measures, we will calculate relative  
38 risks (RRs) to inform relative effectiveness. To generate measures of absolute effect  
39 (risk differences), we will use estimates of baseline risk from the control arm of eligible  
40 RCTs.  
41  
42  
43  
44  
45  
46  
47  
48  
49

50  
51 When pooling across studies reporting continuous endpoints that use the same  
52 instrument, we will calculate the weighted mean difference (WMD), which maintains the  
53 original unit of measurement and represents the average difference between groups.  
54  
55  
56  
57  
58  
59  
60

1  
2  
3  
4  
5  
6  
7  
8  
9  
10  
11  
12  
13  
14  
15  
16  
17  
18  
19  
20  
21  
22  
23  
24  
25  
26  
27  
28  
29  
30  
31  
32  
33  
34  
35  
36  
37  
38  
39  
40  
41  
42  
43  
44  
45  
46  
47  
48  
49  
50  
51  
52  
53  
54  
55  
56  
57  
58  
59  
60

Once the WMD has been calculated, we will contextualize this value by noting the corresponding MID – the smallest change in instrument score that patients perceive is important. We will prioritize use of anchor-based MIDs when available, and calculate distribution-based MIDs when they are not. We will also divide WMDs by their corresponding MID to obtain estimates in MID units. However, contextualizing the WMD through the MID can be misleading; clinicians may mistakenly interpret any effect in MID units smaller than 1 as suggesting no patient obtains an important benefit, and any effect estimate greater than 1 as suggesting that all patients benefit, which is not accurate. Therefore, we will also calculate the proportion of patients who have benefited, i.e. demonstrated improvement greater than or equal to the MID in each trial, then aggregate the results across all studies.[71] Further, we will convert the proportion data to probabilities of experiencing benefit to calculate pooled RRs and numbers needed to treat (NNTs).

For trials that use different continuous outcome measures that address the same underlying construct, we will calculate the between-group difference in change scores (change from baseline) and divide this difference by the SD of the change. This calculation creates a measure of the effect (quantifying its magnitude in standard deviation units) called the standardized mean difference (SMD) that allows for comparison and pooling across trials.[66] However, the SMD is difficult to interpret and is vulnerable to the heterogeneity of patients that are enrolled: trials that enroll homogeneous study populations and thus have smaller standard deviations will generate a larger SMD than studies with more heterogeneous patient populations. To

1  
2  
3 address this issue, we will calculate the effect estimates in MID units by dividing  
4  
5 between-group difference in change scores by the MID. However, as with WMDs,  
6  
7 contextualizing the SMD in MID units can be misleading; therefore, we will, for each  
8  
9 trial, calculate the probability of experiencing a treatment effect greater than or equal to  
10  
11 the MID in the control and intervention groups, then pool the results to calculate RRs  
12  
13 and NNTs.[71]  
14  
15  
16  
17  
18  
19

20 Patients may be interested in the ability of a given intervention to provide more than an  
21  
22 MID – to produce improvement that allows patients to feel much better (i.e. substantially  
23  
24 greater than the MID), Thus, for our analyses, for studies that report percentage  
25  
26 reduction in pain, we will also use thresholds of  $\geq 20\%$ ,  $\geq 30\%$  and  $\geq 50\%$  reduction of  
27  
28 pain from baseline to calculate the proportion of patients who have benefited in each  
29  
30 trial, and derive RRs and risk differences.  
31  
32  
33

### 34 ***Assessment of heterogeneity and subgroup analyses***

35  
36 We will conduct conventional meta-analyses (see above) for each paired comparison.  
37  
38 For each of these comparisons, we will examine heterogeneity using both a chi-squared  
39  
40 test and the  $I^2$  statistic – the percentage of variability that is due to true differences  
41  
42 between studies (heterogeneity) rather than sampling error (chance).[72, 73]  
43  
44  
45  
46  
47

48 We have generated five *a priori* hypotheses to explain variability between studies: (1)  
49  
50 subjective syndromes will show smaller treatment effects versus objectively diagnosed  
51  
52 syndromes; (2) trials comparing treatment to placebo will show larger treatment effects  
53  
54 than trials using active comparators; (3) trials that exclude patients who are receiving  
55  
56  
57  
58  
59  
60

1  
2  
3 disability benefits and/or involved in litigation will show larger treatment effects than  
4 trials that include such patients; (4) chronic neuropathic pain syndromes defined by  
5 peripheral nervous system lesions (e.g. diabetic neuropathy) will show larger effects  
6 that central nervous system lesions (e.g. chronic post-stroke pain); (5) trials with higher  
7 risk of bias will show larger treatment effects than trials with lower risk of bias; and, (6)  
8 trials with longer follow-up times will show smaller treatment effects than trials with  
9 shorter follow-up times. To inform our subgroup analyses based on risk of bias we will, if  
10 we detect variability within the individual risk of bias components, perform subgroup  
11 analyses on a component-by-component basis. We will perform meta-regression and  
12 subgroup analyses to explore these hypotheses, and interpret the results in the context  
13 of the GRADE system (see below).[74]  
14  
15  
16  
17  
18  
19  
20  
21  
22  
23  
24  
25  
26  
27  
28  
29  
30  
31

### 32 ***Confidence in the estimates of effect***

33  
34 We will use the GRADE approach to evaluate confidence in effect estimates for all  
35 reported outcomes.[75] GRADE has been adopted by over 70 organizations worldwide,  
36 and this approach facilitates transparent, rigorous and comprehensive assessment of  
37 evidence quality on a per outcome basis.[76-89] Our review of the management of  
38 chronic neuropathic pain will be the first to use the GRADE criteria to evaluate  
39 confidence in effect estimates. We will categorize the confidence in estimates (quality of  
40 evidence) as high, moderate, low, or very low. Using this approach, randomized trials  
41 begin as high quality evidence but may be rated down by one or more of four categories  
42 of limitations. We will use GRADE guidance to determine whether to rate down  
43 confidence in the body of evidence for: (1) risk of bias;[87] (2) for imprecision; [81] for  
44  
45  
46  
47  
48  
49  
50  
51  
52  
53  
54  
55  
56  
57  
58  
59  
60

1  
2  
3 inconsistency;[83] and for publication bias.[84] For the risk of bias assessment, for any  
4  
5 comparisons that suggest a statistically significant treatment effect, we will use recently  
6  
7 developed approaches to address missing participant data for dichotomous outcomes  
8  
9 and continuous outcomes.[90, 91] When plausible worst case scenarios reverse the  
10  
11 treatment effect we will rate down for risk of bias. We will present the results of our  
12  
13 meta-analyses in GRADE Evidence Profiles that will provide a succinct, easily digestible  
14  
15 presentation of the risk of bias and magnitude of effects.[75]  
16  
17  
18  
19  
20  
21

### 22 ***Multiple treatment comparison meta-analyses***

23  
24 To assess relative effects of competing treatments, we will construct a random effects  
25  
26 model within the Bayesian framework using Markov chain Monte Carlo methods.[92]  
27  
28 We will use trace plots and calculate the Gelman-Rubin statistic to assess model  
29  
30 convergence. We will model patient-important outcomes in every treatment group of  
31  
32 every study, and specify the relations among the effect sizes across studies.[93] This  
33  
34 method combines direct and indirect evidence for any given pair of treatments. We will  
35  
36 use the resulting 95% credible intervals (Cris) to assess the precision of treatment  
37  
38 effects.[94] A key assumption behind multiple treatment comparison meta-analysis is  
39  
40 that the analysed network is consistent or coherent, i.e. that direct and indirect evidence  
41  
42 on the same comparisons do not disagree beyond chance. We will identify and estimate  
43  
44 incoherence by employing a mixed treatment comparisons incoherence model in the  
45  
46 Bayesian framework.[95] For each comparison, we will note the direct estimates and  
47  
48 associated CIs from the previous analysis and calculate the indirect estimate using a  
49  
50  
51  
52  
53  
54  
55  
56  
57  
58  
59  
60

1  
2  
3 node splitting procedure as well as the network estimate. We will conduct a statistical  
4  
5 test for incoherence between the direct and the indirect estimate.  
6  
7  
8  
9

10 We will have assessed confidence in estimates of effect from the direct comparisons in  
11  
12 our pair-wise meta-analyses described previously. For rating confidence in the indirect  
13  
14 comparisons, we will focus our assessments on first-order loops (that is, loops that are  
15  
16 connected to the interventions of interest through only one other intervention; for  
17  
18 example A versus C and B versus C to estimate effects of A versus B) with the lowest  
19  
20 variances, and thus contribute the most to the estimates of effect. Within each loop, our  
21  
22 confidence in the indirect comparison will be the lowest of the confidence ratings we  
23  
24 have assigned to the contributing direct comparisons. For instance, if treatment A  
25  
26 versus C warrants high confidence and B versus C warrants moderate confidence, we  
27  
28 will judge the associated indirect comparison (A versus B) as warranting moderate  
29  
30 confidence. We may rate down confidence in the indirect comparisons further if we have  
31  
32 a strong suspicion that the transitivity assumption (i.e. the assumption that there are no  
33  
34 effect modifiers - such as differences in patients, extent to which interventions have  
35  
36 been optimally administered, differences in the comparator, and differences in how the  
37  
38 outcome has been measured - in the two direct comparisons that may bias the indirect  
39  
40 estimate) has been violated.  
41  
42  
43  
44  
45  
46  
47  
48  
49

50 Our overall judgement of confidence in the network estimate for any paired comparison  
51  
52 will be the higher of the confidence rating amongst the contributing direct and indirect  
53  
54  
55  
56  
57  
58  
59  
60



1  
2  
3 comparisons. However, we may rate down confidence in the network estimate if we find  
4  
5 that the direct and indirect estimates are incoherent.  
6  
7  
8  
9

10 As a secondary analysis, we will rank the interventions using the SUCRA (surface under  
11 the cumulative ranking) method.[96] The SUCRA rankings may be misleading if there is  
12 only evidence warranting low confidence for most comparisons; if the evidence  
13 supporting the higher ranked interventions warrants lower confidence than the evidence  
14 supporting the lower ranked interventions; or if the magnitude of effect is very similar in  
15 higher versus lower ranked comparisons. We will consider these issues in interpreting  
16 the SUCRA rankings.  
17  
18  
19  
20  
21  
22  
23  
24  
25  
26  
27  
28  
29  
30  
31  
32  
33  
34  
35  
36  
37  
38  
39  
40  
41  
42  
43  
44  
45  
46  
47  
48  
49  
50  
51  
52  
53  
54  
55  
56  
57  
58  
59  
60

## DISCUSSION

With the established high prevalence of chronic neuropathic pain worldwide, the associated high socioeconomic burden, and the paucity of evidence on the comparative effectiveness of treatment options, there is an urgent and critical need for a high-quality systematic review to inform evidence-based management of chronic neuropathic pain.

Our proposed review has several strengths in relation to existing reviews. First, we will include all non-pharmacological and pharmacological treatment options for all chronic neuropathic pain syndromes. It is plausible that individual pain syndromes, in general, respond similarly to similar interventions, and thus by pooling across individual syndromes, it may be possible to provide a more precise estimate of treatment effect. In addition, examining all therapies for all chronic neuropathic pain syndromes would provide comprehensive guidance for management of chronic neuropathic pain, which increases utility to health care providers, patients, and payers. Second, we will update the search to present date, explore a wider range of literature databases than existing reviews, and include eligible articles in all languages. Third, we will make all subjective decisions, including determining trial eligibility and collecting data, in teams of reviewers, independently and in duplicate, with assessments of the reproducibility of judgments. Fourth, we will focus on collecting patient-important outcomes across IMMPACT-recommended core domains. Fifth, we will use the GRADE approach to evaluate our confidence in treatment effects. Sixth, we will ensure interpretability by presenting both risk differences and measures of relative effect for all outcomes

1  
2  
3 reported, and by presenting our findings with GRADE Evidence Profiles. Seventh, we  
4  
5 will generate a limited number of *a priori* subgroup hypotheses to explain heterogeneity  
6  
7 of pooled estimates of treatment effect, and conduct meta-regression and subgroup  
8  
9 analyses consistent with best current practices.  
10  
11

12  
13  
14  
15 As with existing reviews, the results of our proposed systematic review will be limited by  
16  
17 possible shortcomings of the primary studies, including presence of publication bias,  
18  
19 high heterogeneity, and poor quality of reporting and methodological rigor. Another  
20  
21 likely limitation, unique to multiple treatment comparison meta-analyses, will be the  
22  
23 nature of available treatment comparisons to build robust networks for our analyses.  
24  
25  
26  
27

28  
29 The findings of our review will help inform patients with chronic neuropathic pain about  
30  
31 their therapeutic options, so that they can make more autonomous health management  
32  
33 decisions. In addition, to help educate clinicians responsible for managing such  
34  
35 patients, our review will facilitate updating clinical practice guidelines for the  
36  
37 management of chronic neuropathic pain.  
38  
39  
40  
41  
42  
43  
44  
45  
46  
47  
48  
49  
50  
51  
52  
53  
54  
55  
56  
57  
58  
59  
60

## FOOTNOTES

**Funding:** This systematic review is supported by the Canadian Anesthesia Research Foundation and the Canadian Institutes of Health Research.

**Contributors:** All authors made substantial contributions to conception and design. SMM drafted the article, and DNB, DEM, RC, ZI, AA, AP, LW, SMK, AT, VM, DIS, LT, GHG, and JWB revised it critically for important intellectual content. All authors provided final approval of the version to be published.

**Competing Interests:** DEM and AP are chair and member, respectively, of the Canadian Pain Society Guideline Committee for management of chronic neuropathic pain. DEM has received research grant funding from Pfizer Canada, and has received honoraria for educational presentations from Jansenn-Ortho, Lilly, Purdue Pharma and Merck-Frosst. All other authors report no conflicts of interest.

**Acronyms:** Crls: Credible intervals; GRADE: Grading of Recommendations, Assessment, Development and Evaluation; IMMPACT: Initiative on Methods, Measurement, and Pain Assessment in Clinical Trials; MD: Mean difference; MID: Minimally important difference; PRISMA: Preferred Reporting Items for Systematic Reviews and Meta-Analyses; RCTs: Randomized controlled trials; RR: Relative risk; SD: Standard deviation; SE: Standard error; SMD: Standardized mean difference; SUCRA: surface under the cumulative ranking; WMD: Weighted mean difference

## REFERENCES

1. Treede R-D, Jensen TS, Campbell J, Cruccu G, Dostrovsky J, Griffin J, Hansson P, Hughes R, Nurmikko T, Serra J: **Neuropathic pain Redefinition and a grading system for clinical and research purposes.** *Neurology* 2008, **70**:1630-1635.
2. Baron R, Förster M, Binder A: **Subgrouping of patients with neuropathic pain according to pain-related sensory abnormalities: a first step to a stratified treatment approach.** *The Lancet Neurology* 2012, **11**:999-1005.
3. Meyer H: **Neuropathic pain-Current concepts.** *South African Family Practice* 2008, **50**:40-49.
4. Gilron I, Watson CPN, Cahill CM, Moulin DE: **Neuropathic pain: a practical guide for the clinician.** *Canadian Medical Association Journal* 2006, **175**:265-275.
5. O'Donnell MJ, Diener HC, Sacco RL, Panju AA, Vinisko R, Yusuf S: **Chronic pain syndromes after ischemic stroke: PRoFESS trial.** *Stroke* 2013, **44**:1238-1243.
6. Attal N: **Neuropathic pain: mechanisms, therapeutic approach, and interpretation of clinical trials.** *Continuum (Minneapolis, Minn)* 2012, **18**:161-175.
7. van Hecke O, Austin SK, Khan RA, Smith BH, Torrance N: **Neuropathic pain in the general population: A systematic review of epidemiological studies.** *Pain* 2014, **155**:654-662.
8. Doth AH, Hansson PT, Jensen MP, Taylor RS: **The burden of neuropathic pain: a systematic review and meta-analysis of health utilities.** *Pain* 2010, **149**:338-344.
9. McDermott AM, Toelle TR, Rowbotham DJ, Schaefer CP, Dukes EM: **The burden of neuropathic pain: results from a cross-sectional survey.** *European journal of pain (London, England)* 2006, **10**:127-135.
10. Attal N, Lanteri-Minet M, Laurent B, Fermanian J, Bouhassira D: **The specific disease burden of neuropathic pain: results of a French nationwide survey.** *Pain* 2011, **152**:2836-2843.
11. Langley PC, Van Litsenburg C, Cappelleri JC, Carroll D: **The burden associated with neuropathic pain in Western Europe.** *Journal of medical economics* 2013, **16**:85-95.
12. Tarride J, Collet J, Choiniere M, Rousseau C, Gordon A: **The economic burden of neuropathic pain in Canada.** *Journal of medical economics* 2006, **9**:55-68.
13. Berger A, Dukes EM, Oster G: **Clinical characteristics and economic costs of patients with painful neuropathic disorders.** *The journal of pain : official journal of the American Pain Society* 2004, **5**:143-149.
14. Simpson EL, Duenas A, Holmes MW, Papaioannou D, Chilcott J: **Spinal cord stimulation for chronic pain of neuropathic or ischaemic origin: systematic review and economic evaluation.** *Health technology assessment (Winchester, England)* 2009, **13**:iii, ix-x, 1-154.
15. Liu H, Li H, Xu M, Chung KF, Zhang SP: **A systematic review on acupuncture for trigeminal neuralgia.** *Alternative therapies in health and medicine* 2010, **16**:30-35.
16. Pittler MH, Ernst E: **Complementary therapies for neuropathic and neuralgic pain: systematic review.** *The Clinical journal of pain* 2008, **24**:731-733.
17. Wetering EJ, Lemmens KM, Nieboer AP, Huijsman R: **Cognitive and behavioral interventions for the management of chronic neuropathic pain in adults--a systematic review.** *European journal of pain (London, England)* 2010, **14**:670-681.
18. Saarto T, Wiffen PJ: **Antidepressants for neuropathic pain.** *Cochrane database of systematic reviews (Online)* 2007:CD005454.
19. Goodyear-Smith F, Halliwell J: **Anticonvulsants for neuropathic pain: gaps in the evidence.** *The Clinical journal of pain* 2009, **25**:528-536.
20. Eisenberg E, McNicol E, Carr DB: **Opioids for neuropathic pain.** *Cochrane database of systematic reviews (Online)* 2006:CD006146.
21. Sauzet O, Williams JE, Ross J, Branford R, Farquhar-Smith P, Griffith GL, Fox-Rushby JA, Peacock JL: **The Characteristics and Quality of Randomized Controlled Trials in Neuropathic Pain: A Descriptive Study Based on a Systematic Review.** *The Clinical journal of pain* 2012.
22. Hearn L, Derry S, Moore RA: **Lacosamide for neuropathic pain and fibromyalgia in adults.** *Cochrane database of systematic reviews (Online)* 2012, **2**:CD009318.
23. Derry S, Moore RA: **Topical capsaicin (low concentration) for chronic neuropathic pain in adults.** *Cochrane database of systematic reviews (Online)* 2012, **9**:CD010111.

- 1
  - 2
  - 3
  - 4
  - 5
  - 6
  - 7
  - 8
  - 9
  - 10
  - 11
  - 12
  - 13
  - 14
  - 15
  - 16
  - 17
  - 18
  - 19
  - 20
  - 21
  - 22
  - 23
  - 24
  - 25
  - 26
  - 27
  - 28
  - 29
  - 30
  - 31
  - 32
  - 33
  - 34
  - 35
  - 36
  - 37
  - 38
  - 39
  - 40
  - 41
  - 42
  - 43
  - 44
  - 45
  - 46
  - 47
  - 48
  - 49
  - 50
  - 51
  - 52
  - 53
  - 54
  - 55
  - 56
  - 57
  - 58
  - 59
  - 60
24. Gill D, Derry S, Wiffen PJ, Moore RA: **Valproic acid and sodium valproate for neuropathic pain and fibromyalgia in adults.** *Cochrane database of systematic reviews (Online)* 2011:CD009183.
25. Moore RA, Wiffen PJ, Derry S, McQuay HJ: **Gabapentin for chronic neuropathic pain and fibromyalgia in adults.** *Cochrane database of systematic reviews (Online)* 2011:CD007938.
26. Wiffen PJ, Derry S, Moore RA, McQuay HJ: **Carbamazepine for acute and chronic pain in adults.** *Cochrane database of systematic reviews (Online)* 2011:CD005451.
27. Chen N, Yang M, He L, Zhang D, Zhou M, Zhu C: **Corticosteroids for preventing postherpetic neuralgia.** *Cochrane database of systematic reviews (Online)* 2010:CD005582.
28. Collins S, Sigtermans MJ, Dahan A, Zuurmond WW, Perez RS: **NMDA receptor antagonists for the treatment of neuropathic pain.** *Pain medicine (Malden, Mass)* 2010, **11**:1726-1742.
29. Lunn MP, Hughes RA, Wiffen PJ: **Duloxetine for treating painful neuropathy or chronic pain.** *Cochrane database of systematic reviews (Online)* 2009:CD007115.
30. Leung A, Donohue M, Xu R, Lee R, Lefaucheur JP, Khedr EM, Saitoh Y, Andre-Obadia N, Rollnik J, Wallace M, Chen R: **rTMS for suppressing neuropathic pain: a meta-analysis.** *The journal of pain : official journal of the American Pain Society* 2009, **10**:1205-1216.
31. Khaliq W, Alam S, Puri N: **Topical lidocaine for the treatment of postherpetic neuralgia.** *Cochrane database of systematic reviews (Online)* 2007:CD004846.
32. Vargas-Espinosa ML, Sanmarti-Garcia G, Vazquez-Delgado E, Gay-Escoda C: **Antiepileptic drugs for the treatment of neuropathic pain: a systematic review.** *Medicina oral, patologia oral y cirugia bucal* 2012, **17**:e786-793.
33. Tremont-Lukats IW, Challapalli V, McNicol ED, Lau J, Carr DB: **Systemic administration of local anesthetics to relieve neuropathic pain: a systematic review and meta-analysis.** *Anesthesia and analgesia* 2005, **101**:1738-1749.
34. Chaparro LE, Wiffen PJ, Moore RA, Gilron I: **Combination pharmacotherapy for the treatment of neuropathic pain in adults.** *Cochrane database of systematic reviews (Online)* 2012, **7**:Cd008943.
35. Derry S, Sven-Rice A, Cole P, Tan T, Moore RA: **Topical capsaicin (high concentration) for chronic neuropathic pain in adults.** *Cochrane database of systematic reviews (Online)* 2013, **2**:Cd007393.
36. Gaskell H, Moore RA, Derry S, Stannard C: **Oxycodone for neuropathic pain and fibromyalgia in adults.** *Cochrane database of systematic reviews (Online)* 2014, **6**:Cd010692.
37. Hearn L, Derry S, Phillips T, Moore RA, Wiffen PJ: **Imipramine for neuropathic pain in adults.** *Cochrane database of systematic reviews (Online)* 2014, **5**:Cd010769.
38. Moore RA, Derry S, Aldington D, Cole P, Wiffen PJ: **Amitriptyline for neuropathic pain and fibromyalgia in adults.** *Cochrane database of systematic reviews (Online)* 2012, **12**:Cd008242.
39. Moore RA, Wiffen PJ, Derry S, Toelle T, Rice AS: **Gabapentin for chronic neuropathic pain and fibromyalgia in adults.** *Cochrane database of systematic reviews (Online)* 2014, **4**:Cd007938.
40. Straube S, Derry S, Moore RA, Cole P: **Cervico-thoracic or lumbar sympathectomy for neuropathic pain and complex regional pain syndrome.** *Cochrane database of systematic reviews (Online)* 2013, **9**:Cd002918.
41. Wiffen PJ, Derry S, Lunn MP, Moore RA: **Topiramate for neuropathic pain and fibromyalgia in adults.** *Cochrane database of systematic reviews (Online)* 2013, **8**:Cd008314.
42. Wiffen PJ, Derry S, Moore RA: **Lamotrigine for chronic neuropathic pain and fibromyalgia in adults.** *Cochrane database of systematic reviews (Online)* 2013, **12**:Cd006044.
43. Wiffen PJ, Derry S, Moore RA, Aldington D, Cole P, Rice AS, Lunn MP, Hamunen K, Haanpaa M, Kalso EA: **Antiepileptic drugs for neuropathic pain and fibromyalgia - an overview of Cochrane reviews.** *Cochrane database of systematic reviews (Online)* 2013, **11**:Cd010567.
44. Wiffen PJ, Derry S, Moore RA, Kalso EA: **Carbamazepine for chronic neuropathic pain and fibromyalgia in adults.** *Cochrane database of systematic reviews (Online)* 2014, **4**:Cd005451.
45. Wiffen PJ, Derry S, Moore RA, Lunn MP: **Levetiracetam for neuropathic pain in adults.** *Cochrane database of systematic reviews (Online)* 2014, **7**:Cd010943.
46. Derry S, Wiffen PJ, Moore RA, Quinlan J: **Topical lidocaine for neuropathic pain in adults.** *Cochrane database of systematic reviews (Online)* 2014, **7**:Cd010958.

- 1  
2  
3  
4  
5  
6  
7  
8  
9  
10  
11  
12  
13  
14  
15  
16  
17  
18  
19  
20  
21  
22  
23  
24  
25  
26  
27  
28  
29  
30  
31  
32  
33  
34  
35  
36  
37  
38  
39  
40  
41  
42  
43  
44  
45  
46  
47  
48  
49  
50  
51  
52  
53  
54  
55  
56  
57  
58  
59  
60
47. Edelsberg JS, Lord C, Oster G: **Systematic review and meta-analysis of efficacy, safety, and tolerability data from randomized controlled trials of drugs used to treat postherpetic neuralgia.** *The Annals of pharmacotherapy* 2011, **45**:1483-1490.
48. Zakrzewska JM, Akram H: **Neurosurgical interventions for the treatment of classical trigeminal neuralgia.** *Cochrane database of systematic reviews (Online)* 2011:CD007312.
49. Yang M, Zhou M, He L, Chen N, Zakrzewska JM: **Non-antiepileptic drugs for trigeminal neuralgia.** *Cochrane database of systematic reviews (Online)* 2011:CD004029.
50. van Alfen N, van Engelen BG, Hughes RA: **Treatment for idiopathic and hereditary neuralgic amyotrophy (brachial neuritis).** *Cochrane database of systematic reviews (Online)* 2009:CD006976.
51. Griebeler ML, Tsapas A, Brito JP, Wang Z, Phung OJ, Montori VM, Murad MH: **Pharmacologic interventions for painful diabetic neuropathy: an umbrella systematic review and comparative effectiveness network meta-analysis (Protocol).** *Systematic reviews* 2012, **1**:61.
52. Wong MC, Chung JW, Wong TK: **Effects of treatments for symptoms of painful diabetic neuropathy: systematic review.** *BMJ (Clinical research ed)* 2007, **335**:87.
53. Snedecor SJ, Sudharshan L, Cappelleri JC, Sadosky A, Mehta S, Botteman M: **Systematic Review and Meta-Analysis of Pharmacological Therapies for Painful Diabetic Peripheral Neuropathy.** *Pain practice : the official journal of World Institute of Pain* 2013.
54. Xia L, Zhong J, Zhu J, Wang YN, Dou NN, Liu MX, Visocchi M, Li ST: **Effectiveness and Safety of Microvascular Decompression Surgery for Treatment of Trigeminal Neuralgia: A Systematic Review.** *The Journal of craniofacial surgery* 2014.
55. Rudroju N, Bansal D, Talakokkula ST, Gudala K, Hota D, Bhansali A, Ghai B: **Comparative efficacy and safety of six antidepressants and anticonvulsants in painful diabetic neuropathy: a network meta-analysis.** *Pain physician* 2013, **16**:E705-714.
56. Ney JP, Devine EB, Watanabe JH, Sullivan SD: **Comparative efficacy of oral pharmaceuticals for the treatment of chronic peripheral neuropathic pain: meta-analysis and indirect treatment comparisons.** *Pain medicine (Malden, Mass)* 2013, **14**:706-719.
57. Selph S, Carson S, Fu R, Thakurta S, Low A, McDonagh M: *Drug Class Review: Neuropathic Pain: Final Update 1 Report.* Portland OR: 2011 by Oregon Health & Science University.; 2011.
58. Berger VW: **Is the Jadad score the proper evaluation of trials?** *The Journal of rheumatology* 2006, **33**:1710-1711; author reply 1711-1712.
59. **Systematic Review of Quality Assessment Instruments for Randomized Control Trials: Selection of SIGN50 Methodological Checklist** [<http://www.imbi.uni-freiburg.de/OJS/cca/index.php/cca/article/view/5053>]
60. Busse JW, Bruno P, Malik K, Connell G, Torrance D, Ngo T, Kirmayr K, Avrahami D, Riva JJ, Ebrahim S, et al: **An efficient strategy allowed English-speaking reviewers to identify foreign-language articles eligible for a systematic review.** *Journal of clinical epidemiology* 2014, **67**:547-553.
61. Landis JR, Koch GG: **The measurement of observer agreement for categorical data.** *Biometrics* 1977, **33**:159-174.
62. Turk DC, Dworkin RH, Allen RR, Bellamy N, Brandenburg N, Carr DB, Cleeland C, Dionne R, Farrar JT, Galer BS, et al: **Core outcome domains for chronic pain clinical trials: IMMPACT recommendations.** *Pain* 2003, **106**:337-345.
63. Turk DC, Dworkin RH, Revicki D, Harding G, Burke LB, Cella D, Cleeland CS, Cowan P, Farrar JT, Hertz S, et al: **Identifying important outcome domains for chronic pain clinical trials: an IMMPACT survey of people with pain.** *Pain* 2008, **137**:276-285.
64. Ioannidis JP, Lau J: **Completeness of safety reporting in randomized trials: an evaluation of 7 medical areas.** *JAMA : the journal of the American Medical Association* 2001, **285**:437-443.
65. Akl EA, Sun X, Busse JW, Johnston BC, Briel M, Mulla S, You JJ, Bassler D, Lamontagne F, Vera C, et al: **Specific instructions for estimating unclearly reported blinding status in randomized trials were reliable and valid.** *Journal of clinical epidemiology* 2012, **65**:262-267.
66. Higgins JP, Green S: **Cochrane Handbook for Systematic Reviews of Interventions, Version [5.1.0] (updated March 2011).** In *Book Cochrane Handbook for Systematic Reviews of Interventions, Version [5.1.0] (updated March 2011)* (Editor ed. Aeds.). City: The Cochrane Collaboration [2011].
67. DerSimonian R, Laird N: **Meta-analysis in clinical trials.** *Controlled clinical trials* 1986, **7**:177-188.

- 1  
2  
3  
4  
5  
6  
7  
8  
9  
10  
11  
12  
13  
14  
15  
16  
17  
18  
19  
20  
21  
22  
23  
24  
25  
26  
27  
28  
29  
30  
31  
32  
33  
34  
35  
36  
37  
38  
39  
40  
41  
42  
43  
44  
45  
46  
47  
48  
49  
50  
51  
52  
53  
54  
55  
56  
57  
58  
59  
60
68. Cornell JE, Mulrow CD, Localio R, Stack CB, Meibohm AR, Guallar E, Goodman SN: **Random-Effects Meta-analysis of Inconsistent Effects: A Time for Change.** *Annals of internal medicine* 2014, **160**:267-270-270.
69. Brockwell SE, Gordon IR: **A comparison of statistical methods for meta-analysis.** *Statistics in medicine* 2001, **20**:825-840.
70. Guolo A: **Higher-order likelihood inference in meta-analysis and meta-regression.** *Statistics in medicine* 2012, **31**:313-327.
71. Thorlund K, Walter SD, Johnston BC, Furukawa TA, Guyatt GH: **Pooling health-related quality of life outcomes in meta-analysis—a tutorial and review of methods for enhancing interpretability.** *Research Synthesis Methods* 2011.
72. Higgins JP, Thompson SG: **Quantifying heterogeneity in a meta-analysis.** *Statistics in medicine* 2002, **21**:1539-1558.
73. Higgins JP, Thompson SG, Deeks JJ, Altman DG: **Measuring inconsistency in meta-analyses.** *BMJ (Clinical research ed)* 2003, **327**:557-560.
74. Altman DG, Bland JM: **Interaction revisited: the difference between two estimates.** *BMJ (Clinical research ed)* 2003, **326**:219.
75. Atkins D, Best D, Briss PA, Eccles M, Falck-Ytter Y, Flottorp S, Guyatt GH, Harbour RT, Haugh MC, Henry D, et al: **Grading quality of evidence and strength of recommendations.** *BMJ (Clinical research ed)* 2004, **328**:1490.
76. Balslem H, Helfand M, Schunemann HJ, Oxman AD, Kunz R, Brozek J, Vist GE, Falck-Ytter Y, Meerpohl J, Norris S, Guyatt GH: **GRADE guidelines: 3. Rating the quality of evidence.** *Journal of clinical epidemiology* 2011, **64**:401-406.
77. Brunetti M, Shemilt I, Pregno S, Vale L, Oxman AD, Lord J, Sisk J, Ruiz F, Hill S, Guyatt GH, et al: **GRADE guidelines: 10. Considering resource use and rating the quality of economic evidence.** *Journal of clinical epidemiology* 2013, **66**:140-150.
78. Guyatt G, Oxman AD, Akl EA, Kunz R, Vist G, Brozek J, Norris S, Falck-Ytter Y, Glasziou P, DeBeer H, et al: **GRADE guidelines: 1. Introduction-GRADE evidence profiles and summary of findings tables.** *Journal of clinical epidemiology* 2011, **64**:383-394.
79. Guyatt G, Oxman AD, Sultan S, Brozek J, Glasziou P, Alonso-Coello P, Atkins D, Kunz R, Montori V, Jaeschke R, et al: **GRADE guidelines: 11. Making an overall rating of confidence in effect estimates for a single outcome and for all outcomes.** *Journal of clinical epidemiology* 2013, **66**:151-157.
80. Guyatt GH, Oxman AD, Kunz R, Atkins D, Brozek J, Vist G, Alderson P, Glasziou P, Falck-Ytter Y, Schunemann HJ: **GRADE guidelines: 2. Framing the question and deciding on important outcomes.** *Journal of clinical epidemiology* 2011, **64**:395-400.
81. Guyatt GH, Oxman AD, Kunz R, Brozek J, Alonso-Coello P, Rind D, Devereaux PJ, Montori VM, Freyschuss B, Vist G, et al: **GRADE guidelines 6. Rating the quality of evidence--imprecision.** *Journal of clinical epidemiology* 2011, **64**:1283-1293.
82. Guyatt GH, Oxman AD, Kunz R, Woodcock J, Brozek J, Helfand M, Alonso-Coello P, Falck-Ytter Y, Jaeschke R, Vist G, et al: **GRADE guidelines: 8. Rating the quality of evidence--indirectness.** *Journal of clinical epidemiology* 2011, **64**:1303-1310.
83. Guyatt GH, Oxman AD, Kunz R, Woodcock J, Brozek J, Helfand M, Alonso-Coello P, Glasziou P, Jaeschke R, Akl EA, et al: **GRADE guidelines: 7. Rating the quality of evidence--inconsistency.** *Journal of clinical epidemiology* 2011, **64**:1294-1302.
84. Guyatt GH, Oxman AD, Montori V, Vist G, Kunz R, Brozek J, Alonso-Coello P, Djulbegovic B, Atkins D, Falck-Ytter Y, et al: **GRADE guidelines: 5. Rating the quality of evidence--publication bias.** *Journal of clinical epidemiology* 2011, **64**:1277-1282.
85. Guyatt GH, Oxman AD, Santesso N, Helfand M, Vist G, Kunz R, Brozek J, Norris S, Meerpohl J, Djulbegovic B, et al: **GRADE guidelines: 12. Preparing summary of findings tables-binary outcomes.** *Journal of clinical epidemiology* 2013, **66**:158-172.
86. Guyatt GH, Oxman AD, Sultan S, Glasziou P, Akl EA, Alonso-Coello P, Atkins D, Kunz R, Brozek J, Montori V, et al: **GRADE guidelines: 9. Rating up the quality of evidence.** *Journal of clinical epidemiology* 2011, **64**:1311-1316.



- 1  
2  
3 87. Guyatt GH, Oxman AD, Vist G, Kunz R, Brozek J, Alonso-Coello P, Montori V, Akl EA, Djulbegovic B, Falck-  
4 Ytter Y, et al: **GRADE guidelines: 4. Rating the quality of evidence--study limitations (risk of bias).** *Journal*  
5 *of clinical epidemiology* 2011, **64**:407-415.  
6  
7 88. Guyatt GH, Thorlund K, Oxman AD, Walter SD, Patrick D, Furukawa TA, Johnston BC, Karanickolas P, Akl EA,  
8 Vist G, et al: **GRADE guidelines: 13. Preparing summary of findings tables and evidence profiles-**  
9 **continuous outcomes.** *Journal of clinical epidemiology* 2013, **66**:173-183.  
10 89. Andrews J, Guyatt G, Oxman AD, Alderson P, Dahm P, Falck-Ytter Y, Nasser M, Meerpohl J, Post PN, Kunz  
11 R, et al: **GRADE guidelines: 15. Going from evidence to recommendations: the significance and**  
12 **presentation of recommendations.** *Journal of clinical epidemiology* 2013.  
13 90. Ebrahim S, Akl EA, Mustafa RA, Sun X, Walter SD, Heels-Ansdell D, Alonso-Coello P, Johnston BC, Guyatt  
14 GH: **Addressing continuous data for participants excluded from trial analysis: a guide for systematic**  
15 **reviewers.** *Journal of clinical epidemiology* 2013.  
16 91. Akl EA, Johnston BC, Alonso-Coello P, Neumann I, Ebrahim S, Briel M, Cook DJ, Guyatt GH: **Addressing**  
17 **dichotomous data for participants excluded from trial analysis: a guide for systematic reviewers.** *PLoS*  
18 *One* 2013, **8**:e57132.  
19 92. Ades AE, Sculpher M, Sutton A, Abrams K, Cooper N, Welton N, Lu G: **Bayesian methods for evidence**  
20 **synthesis in cost-effectiveness analysis.** *PharmacoEconomics* 2006, **24**:1-19.  
21 93. Salanti G, Higgins JP, Ades AE, Ioannidis JP: **Evaluation of networks of randomized trials.** *Statistical*  
22 *methods in medical research* 2008, **17**:279-301.  
23 94. Sterne JA, Davey Smith G: **Sifting the evidence-what's wrong with significance tests?** *BMJ (Clinical*  
24 *research ed)* 2001, **322**:226-231.  
25 95. Lu G, Ades A: **Assessing evidence inconsistency in mixed treatment comparisons.** *Journal of the American*  
26 *Statistical Association* 2006, **101**:447-459.  
27 96. Salanti G, Ades AE, Ioannidis JP: **Graphical methods and numerical summaries for presenting results**  
28 **from multiple-treatment meta-analysis: an overview and tutorial.** *Journal of clinical epidemiology* 2011,  
29 **64**:163-171.  
30  
31  
32  
33  
34  
35  
36  
37  
38  
39  
40  
41  
42  
43  
44  
45  
46  
47  
48  
49  
50  
51  
52  
53  
54  
55  
56  
57  
58  
59  
60

1  
2  
3 **Management of chronic neuropathic pain: a protocol for a multiple treatment**  
4 **comparison meta-analysis of randomized controlled trials**  
5  
6  
7  
8  
9  
10  
11  
12

13 Sohail M. Mulla, MSc<sup>\*1,2</sup> [mullasm@mcmaster.ca](mailto:mullasm@mcmaster.ca)  
14  
15 D. Norman Buckley, MD<sup>3,4</sup> [buckleyn@mcmaster.ca](mailto:buckleyn@mcmaster.ca)  
16  
17 Dwight E. Moulin, MD<sup>5</sup> [dwight.moulin@lhsc.on.ca](mailto:dwight.moulin@lhsc.on.ca)  
18  
19 Rachel Couban, MA, MIST<sup>4</sup> [rcouban@mcmaster.ca](mailto:rcouban@mcmaster.ca)  
20  
21 Zain Izhar<sup>1</sup> [izharmz@mcmaster.ca](mailto:izharmz@mcmaster.ca)  
22  
23 Arnav Agarwal, BHSc<sup>1</sup> [arnav.agarwal@learnlink.mcmaster.ca](mailto:arnav.agarwal@learnlink.mcmaster.ca)  
24  
25 Akbar Panju, MD<sup>4,6</sup> [panju@hhsc.ca](mailto:panju@hhsc.ca)  
26  
27 Li Wang, PhD<sup>3</sup> [lwang246@gmail.com](mailto:lwang246@gmail.com)  
28  
29 Sun Makosso Kallyth, PhD<sup>4</sup> [makossok@mcmaster.ca](mailto:makossok@mcmaster.ca)  
30  
31 Alparslan Turan, MD<sup>7</sup> [turana@ccf.org](mailto:turana@ccf.org)  
32  
33 Victor M. Montori, MD, MSc<sup>8</sup> [montori.victor@mayo.edu](mailto:montori.victor@mayo.edu)  
34  
35 Daniel I. Sessler, MD<sup>7</sup> [ds@or.org](mailto:ds@or.org)  
36  
37 Lehana Thabane, PhD<sup>1,3,9</sup> [thabanl@mcmaster.ca](mailto:thabanl@mcmaster.ca)  
38  
39 Gordon H. Guyatt, MD, MSc<sup>1,6</sup> [guyatt@mcmaster.ca](mailto:guyatt@mcmaster.ca)  
40  
41 Jason W. Busse, DC, PhD<sup>1,3,4</sup> [bussejw@mcmaster.ca](mailto:bussejw@mcmaster.ca)  
42  
43  
44  
45  
46  
47  
48  
49

50 <sup>1</sup>Department of Clinical Epidemiology & Biostatistics, McMaster University, Hamilton,  
51 Ontario, Canada  
52

53 <sup>2</sup>Outcomes Research Consortium, Cleveland, Ohio, United States  
54  
55  
56  
57  
58  
59  
60

1  
2  
3 <sup>3</sup>Department of Anesthesia, McMaster University, Hamilton, Ontario, Canada

4  
5 <sup>4</sup>Michael G. DeGroot Institute for Pain Research and Care, McMaster University,  
6  
7  
8 Hamilton, Ontario, Canada

9  
10 <sup>5</sup>Departments of Clinical Neurological Sciences and Oncology, Western University,  
11  
12 London, Ontario, Canada

13  
14 <sup>6</sup>Department of Medicine, McMaster University, Hamilton, Ontario, Canada

15  
16  
17 <sup>7</sup>Department of Outcomes Research, Cleveland Clinic, Cleveland, Ohio, USA

18  
19  
20 <sup>8</sup>Knowledge and Evaluation Research Unit, Divisions of Endocrinology and Diabetes,  
21  
22 and Health Care & Policy Research, Mayo Clinic, Rochester, Minnesota, USA

23  
24 <sup>9</sup>Department of Pediatrics, McMaster University, Hamilton, Ontario, Canada

25  
26  
27  
28  
29 \*Corresponding author:

30  
31  
32 Sohail M. Mulla, MSc

33  
34 Department of Clinical Epidemiology & Biostatistics, HSC-2C7

35  
36  
37 McMaster University

38  
39 1280 Main Street West

40  
41  
42 Hamilton, Ontario, L8S 4K1

43  
44  
45 Canada

46  
47  
48 E-mail: [mullasm@mcmaster.ca](mailto:mullasm@mcmaster.ca)

## ABSTRACT

**Introduction:** Chronic neuropathic pain is associated with reduced health-related quality of life and substantial socioeconomic costs. Current research addressing management of chronic neuropathic pain is limited. No review has evaluated all interventional studies for chronic neuropathic pain, which limits attempts to make inferences regarding the relative effectiveness of treatments.

**Methods and analysis:** We will conduct a systematic review of all randomized controlled trials evaluating therapies for chronic neuropathic pain. We will identify eligible trials, in any language, by a systematic search of CINAHL, EMBASE, MEDLINE, AMED, HealthSTAR, DARE, PsychINFO, and the Cochrane Central Registry of Controlled Trials. Eligible trials will: (1) enrol patients presenting with chronic neuropathic pain, and (2) randomize patients to alternative interventions (pharmacological or non-pharmacological) or an intervention and a control arm. Pairs of reviewers will, independently and in duplicate, screen titles and abstracts of identified citations, review the full texts of potentially eligible trials, and extract information from eligible trials. We will use a modified Cochrane instrument to evaluate risk of bias of eligible studies, recommendations from the Initiative on Methods, Measurement, and Pain Assessment in Clinical Trials (IMMPACT) to inform the outcomes we will collect, and the Grading of Recommendations Assessment, Development and Evaluation (GRADE) system to evaluate our confidence in treatment effects. When possible, we will conduct: (1) in direct comparisons, a random-effects meta-analyses to establish the

1  
2  
3 effect of reported therapies on patient-important outcomes; and (2) a multiple treatment  
4  
5 comparison meta-analysis within a Bayesian framework to assess the relative effects of  
6  
7 treatments. We will define *a priori* hypotheses to explain heterogeneity between studies,  
8  
9 and conduct meta-regression and subgroup analyses consistent with current best  
10  
11 practices.  
12  
13

14  
15  
16  
17 **Ethics and Dissemination:** We do not require ethics approval for our proposed review.  
18  
19 We will disseminate our findings through peer-reviewed publications and conference  
20  
21 presentations.  
22  
23

24  
25  
26  
27 **Registration:** PROSPERO (CRD42014009212).  
28  
29  
30  
31  
32  
33  
34  
35  
36  
37  
38  
39  
40  
41  
42  
43  
44  
45  
46  
47  
48  
49  
50  
51  
52  
53  
54  
55  
56  
57  
58  
59  
60

## STRENGTHS AND LIMITATIONS

- Our broad study eligibility criteria will allow us to generate more precise estimates of treatment effects, thus increasing generalizability of our results.
- We will use the GRADE approach to evaluate our confidence in treatment effects, and the IMMPACT guidelines to inform the outcomes we will collect. No existing review on the topic has done so.
- We will ensure interpretability by presenting both risk differences and measures of relative effect for all outcomes reported, and by presenting our findings with GRADE Evidence Profiles. No existing review on the topic has done so.
- Our results will be limited by possible shortcomings of the primary studies.

## BACKGROUND

Chronic neuropathic pain is defined as “pain arising as a direct consequence of a lesion or disease affecting the somatosensory system.”[1] It may be classified as central or peripheral, depending on the site of the lesion.[2] Among the causes of chronic neuropathic pain are metabolic disease (e.g. diabetes), infection (e.g. shingles), trauma (e.g. spinal cord injury), and autoimmune disease (e.g. multiple sclerosis).[3-5] The pain may be spontaneous or evoked in response to physical stimuli. The latter may manifest as increased sensitivity to pain (hyperalgesia) or as a painful response to a stimulus that would not normally be painful (allodynia).[4, 6]

Chronic neuropathic pain is common worldwide, affecting 7% to 10% of the general population.[7] It is associated with depression, anxiety, and sleep disturbances, and patients with chronic neuropathic pain experience lower health-related quality of life than the general population.[8-11]

Chronic neuropathic pain is associated with substantial economic burden. Tarride et al. estimated that managing a Canadian patient with chronic neuropathic pain over a three-month period costs an average of \$2,567, of which 52% are direct costs, e.g. cost of physicians, diagnostic tests, and surgical procedures.[12] Others report that people suffering from chronic neuropathic pain generate medical costs that are three times greater than those not living with pain.[11, 13] In the United States alone, almost \$40

1  
2  
3 billion annually in health care, disability and related costs is attributed to chronic  
4  
5 neuropathic pain.[4]  
6  
7  
8  
9

10 The underlying mechanisms of chronic neuropathic pain are poorly understood, which  
11 complicates management. Both non-pharmacological and pharmacological treatments  
12 are currently used. A limited number of systematic reviews focus on non-  
13 pharmacological options, including electrical nerve stimulation,[14] acupuncture,[15, 16]  
14 and cognitive behavioural therapy [17]. Most report pharmacological treatments for  
15 chronic neuropathic pain, including antidepressants,[18] anticonvulsants,[19] and opioid  
16 analgesics.[20]  
17  
18  
19  
20  
21  
22  
23  
24  
25  
26  
27  
28

29 Significant gaps remain though. For example, randomized controlled trials (RCTs)  
30 exploring treatment for chronic neuropathic pain often compare pharmacological  
31 treatments against placebo and seldom against each other. Consequently, there are  
32 few direct comparisons among treatments. A recent systematic review found that  
33 among 131 RCTs published between 1969 and 2007 and addressing painful diabetic  
34 neuropathy and postherpetic neuralgia, both common types of peripheral neuropathic  
35 pain, only 25 studies (19%) compared drugs directly against each other.[21]  
36  
37  
38  
39  
40  
41  
42  
43  
44  
45  
46  
47

48 [No review to date has systematically evaluated all evidence for management of chronic](#)  
49 [neuropathic pain; existing](#) ~~Although systematic reviews have addressed management of~~  
50 ~~chronic neuropathic pain, most reviews~~ focus on select therapies [18, 20, 22-46] or  
51 specific syndromes.[47-57] ~~No review to date has systematically evaluated all evidence~~  
52  
53  
54  
55  
56  
57  
58  
59  
60



1  
2  
3 | ~~for management of chronic neuropathic pain.~~ Additionally, risk of bias assessment of  
4  
5  
6 studies included in existing reviews has been variable, and authors often depended on  
7  
8 instruments that have been criticized for being overly simplistic (e.g. Jadad system)  
9  
10 and/or assessed risk of bias on a per-study basis rather than overall for reported  
11  
12 outcome.[58, 59] Furthermore, strategies to identify studies have been limited, as  
13  
14 authors used few search terms, they did not search major literature databases, and/or  
15  
16 they did not consider foreign language studies – an approach that would have excluded  
17  
18 12% of eligible trials in a systematic review of another chronic pain syndrome.[60] As  
19  
20 well, none of the reviews employ the Grading of Recommendations Assessment,  
21  
22 Development and Evaluation (GRADE) approach to evaluate the confidence in effect  
23  
24 estimates (quality of evidence) for reported outcomes. And finally, none of the existing  
25  
26 reviews facilitate interpretability, for instance, by presenting results in terms of minimally  
27  
28 important differences (MID).  
29  
30  
31  
32  
33  
34  
35

36 The limitations of previous works suggests the need for a new systematic review to be  
37  
38 conducted using state-of-the-art methodology to inform evidence-based management of  
39  
40 chronic neuropathic pain. We thus plan a systematic review and multiple treatment  
41  
42 comparison meta-analysis of therapies for chronic neuropathic pain.  
43  
44  
45  
46  
47  
48  
49  
50  
51  
52  
53  
54  
55  
56  
57  
58  
59  
60

## METHODS

### ***Standardized Reporting***

Our paper will conform to the Preferred Reporting Items for Systematic Reviews and Meta-Analyses (PRISMA) guidelines for reporting systematic reviews of RCTs.

### ***Protocol Registration***

Our protocol is registered on PROSPERO (registration number: CRD42014009212).

### ***Search Strategy***

We will identify relevant RCTs, in any language, by a systematic search of CINAHL, EMBASE, MEDLINE, AMED, HealthSTAR, DARE, PsychINFO, PapersFirst, ProceedingsFirst, and the Cochrane Central Registry of Controlled Trials, from the inception of each database. Our search will be refined for individual databases by a highly experienced medical librarian (RC) [Appendix 1 is a proposed search strategy for MEDLINE]. Reviewers will scan the bibliographies of all retrieved trials and other relevant publications, including reviews and meta-analyses, for additional relevant articles.

### ***Eligibility criteria and their application to potentially eligible articles***

Using standardized forms, reviewers trained in health research methodology will work in pairs to screen, independently and in duplicate, titles and abstracts of identified citations and acquire the full text publication of articles that both reviewers judge as potentially

1  
2  
3 eligible. Using a standardized form, the same reviewer teams will independently apply  
4  
5 eligibility criteria to the full text of potentially eligible trials. We will measure agreement  
6  
7 between reviewers to assess the reliability of full-text review using the guidelines  
8  
9 proposed by Landis and Koch.[61] Specifically, we will calculate Kappa values, and  
10  
11 interpret them using the following thresholds: <0.20 as slight agreement, 0.21-0.40 as  
12  
13 fair agreement, 0.41-0.60 as moderate agreement, 0.61-0.80 as substantial agreement,  
14  
15 and >0.80 as almost perfect agreement. Eligible trials will: (1) enrol patients presenting  
16  
17 with chronic neuropathic pain [Appendix 2 lists all syndromes we are studying], and (2)  
18  
19 randomize patients to alternative interventions (pharmacological or non-  
20  
21 pharmacological) or to an intervention and control arm.  
22  
23  
24  
25  
26  
27  
28

### 29 ***Data Abstraction and Analysis***

30  
31 Before starting data abstraction, we will conduct calibration exercises to ensure  
32  
33 consistency between reviewers. Teams of reviewers will extract data independently and  
34  
35 in duplicate from each eligible study using standardized forms and a detailed instruction  
36  
37 manual to inform tailoring of an online data abstraction program, DistillerSR  
38  
39 (<http://systematic-review.net/>). We will extract data regarding patient demographics, trial  
40  
41 methodology, intervention details, and outcome data guided by the Initiative on  
42  
43 Methods, Measurement, and Pain Assessment in Clinical Trials (IMMPACT).[62, 63]  
44  
45 Specifically, we will collect outcome data across the following nine IMMPACT-  
46  
47 recommended core outcome domains: (1) pain; (2) physical functioning; (3) emotional  
48  
49 functioning; (4) participant ratings of improvement and satisfaction with treatment; (5)  
50  
51 symptoms and adverse events; (6) participation disposition; (7) role functioning; (8)  
52  
53  
54  
55  
56  
57  
58  
59  
60

1  
2  
3 Interpersonal functioning; and (9) sleep and fatigue. We will collect data for all adverse  
4  
5 outcomes as guided by Ioannidis and Lau.[64] We will resolve disagreements by  
6  
7 discussion to achieve consensus.  
8  
9

### 10 11 12 ***Evaluating risk of bias in individual studies***

13  
14 Reviewers will assess risk of bias using a modified Cochrane risk of bias instrument that  
15  
16 includes response options of “definitely or probably yes” – assigned a low risk of bias –  
17  
18 or “definitely or probably no” – assigned a high risk of bias, an approach we have  
19  
20 previously shown to be valid.[65] We will evaluate sequence generation, allocation  
21  
22 sequence concealment; blinding of participants and study personnel; and, incomplete  
23  
24 outcome data.[66] We will resolve any disagreements between reviewers by discussion.  
25  
26 We will contact study authors if limitations in reporting lead to uncertainties in eligibility,  
27  
28 risk of bias, or outcome.  
29  
30  
31  
32  
33  
34  
35

### 36 37 ***Direct comparisons meta-analyses***

38  
39 In comparison to fixed effect models, random effect models are conservative in that they  
40  
41 consider both within- and among-study variability. Recent methodological research has  
42  
43 shown that while popular, the DerSimonian–Laird method [67] can produce narrow  
44  
45 confidence intervals when the number of studies is small or when they are substantively  
46  
47 heterogeneous.[68, 69] Therefore, to pool outcome data for trials that make direct  
48  
49 comparisons between interventions and alternatives, we will use the likelihood profile  
50  
51 approach.[70] We will pool cross-over trials with parallel design RCTs using methods  
52  
53 outlined in the Cochrane handbook to derive effect estimates.[66] Specifically, we will  
54  
55  
56  
57  
58  
59  
60

1  
2  
3 perform a paired t-test for each crossover trial if any of the following are available: (1)  
4 the individual participant data; (2) the mean and standard deviation (SD) or standard  
5 error (SE) of the participant-specific differences and between the intervention and  
6 control measurement; (3) the mean difference (MD) and one of the following: (i) a t-  
7 statistic from a paired t-test; (ii) a P value from a paired t-test; (iii) a confidence interval  
8 from a paired analysis; or (4) a graph of measurements of the intervention arm and  
9 control arm from which we can extract individual data values, so long as the matched  
10 measurement for each individual can be identified.[66] If these data are not available,  
11 we will approximate paired analyses by calculating the MDs and the corresponding SEs  
12 for the paired analyses.[66] If the SE or SD of within-participant differences are not  
13 available, we will impute the SD using the methods outlined in the Cochrane  
14 Handbook.[66]

### 34 ***Ensuring Interpretable Results***

35  
36 We will use a number of approaches to provide interpretable results from our meta-  
37 analyses. For studies that provide binary outcome measures, we will calculate relative  
38 risks (RRs) to inform relative effectiveness. To generate measures of absolute effect  
39 (risk differences), we will use estimates of baseline risk from the control arm of eligible  
40 RCTs.  
41  
42  
43  
44  
45  
46  
47  
48  
49

50  
51 When pooling across studies reporting continuous endpoints that use the same  
52 instrument, we will calculate the weighted mean difference (WMD), which maintains the  
53 original unit of measurement and represents the average difference between groups.  
54  
55  
56  
57  
58  
59  
60

1  
2  
3  
4  
5  
6  
7  
8  
9  
10  
11  
12  
13  
14  
15  
16  
17  
18  
19  
20  
21  
22  
23  
24  
25  
26  
27  
28  
29  
30  
31  
32  
33  
34  
35  
36  
37  
38  
39  
40  
41  
42  
43  
44  
45  
46  
47  
48  
49  
50  
51  
52  
53  
54  
55  
56  
57  
58  
59  
60

Once the WMD has been calculated, we will contextualize this value by noting the corresponding MID – the smallest change in instrument score that patients perceive is important. We will prioritize use of anchor-based MIDs when available, and calculate distribution-based MIDs when they are not. We will also divide WMDs by their corresponding MID to obtain estimates in MID units. However, contextualizing the WMD through the MID can be misleading; clinicians may mistakenly interpret any effect in MID units smaller than 1 as suggesting no patient obtains an important benefit, and any effect estimate greater than 1 as suggesting that all patients benefit, which is not accurate. Therefore, we will also calculate the proportion of patients who have benefited, i.e. demonstrated improvement greater than or equal to the MID in each trial, then aggregate the results across all studies.[71] Further, we will convert the proportion data to probabilities of experiencing benefit to calculate pooled RRs and numbers needed to treat (NNTs).

For trials that use different continuous outcome measures that address the same underlying construct, we will calculate the between-group difference in change scores (change from baseline) and divide this difference by the SD of the change. This calculation creates a measure of the effect (quantifying its magnitude in standard deviation units) called the standardized mean difference (SMD) that allows for comparison and pooling across trials.[66] However, the SMD is difficult to interpret and is vulnerable to the heterogeneity of patients that are enrolled: trials that enroll homogeneous study populations and thus have smaller standard deviations will generate a larger SMD than studies with more heterogeneous patient populations. To

1  
2  
3 address this issue, we will calculate the effect estimates in MID units by dividing  
4  
5 between-group difference in change scores by the MID. However, as with WMDs,  
6  
7 contextualizing the SMD in MID units can be misleading; therefore, we will, for each  
8  
9 trial, calculate the probability of experiencing a treatment effect greater than or equal to  
10  
11 the MID in the control and intervention groups, then pool the results to calculate RRs  
12  
13 and NNTs.[71]  
14  
15  
16  
17

18  
19  
20 Patients may be interested in the ability of a given intervention to provide more than an  
21  
22 MID – to produce improvement that allows patients to feel much better (i.e. substantially  
23  
24 greater than the MID). Thus, for our analyses, for studies that report percentage  
25  
26 reduction in pain, we will also use thresholds of  $\geq 20\%$ ,  $\geq 30\%$  and  $\geq 50\%$  reduction of  
27  
28 pain from baseline to calculate the proportion of patients who have benefited in each  
29  
30 trial, and derive RRs and risk differences.  
31  
32  
33  
34  
35

### 36 **Assessment of heterogeneity and subgroup analyses**

37  
38 We will conduct conventional meta-analyses (see above) for each paired comparison.  
39  
40 For each of these comparisons, we will examine heterogeneity using both a chi-squared  
41  
42 test and the  $I^2$  statistic – the percentage of variability that is due to true differences  
43  
44 between studies (heterogeneity) rather than sampling error (chance).[72, 73]  
45  
46  
47  
48  
49

50 We have generated five *a priori* hypotheses to explain variability between studies: (1)  
51  
52 subjective syndromes will show smaller treatment effects versus objectively diagnosed  
53  
54 syndromes; (2) trials comparing treatment to placebo will show larger treatment effects  
55  
56  
57  
58  
59  
60

1  
2  
3 than trials using active comparators; (3) trials that exclude patients who are receiving  
4 disability benefits and/or involved in litigation will show larger treatment effects than  
5 trials that include such patients; (4) chronic neuropathic pain syndromes defined by  
6 peripheral nervous system lesions (e.g. diabetic neuropathy) will show larger effects  
7 that central nervous system lesions (e.g. chronic post-stroke pain); (5) trials with higher  
8 risk of bias will show larger treatment effects than trials with lower risk of bias; and, (6)  
9 trials with longer follow-up times will show smaller treatment effects than trials with  
10 shorter follow-up times. To inform our subgroup analyses based on risk of bias we will, if  
11 we detect variability within the individual risk of bias components, perform subgroup  
12 analyses on a component-by-component basis. We will perform meta-regression and  
13 subgroup analyses to explore these hypotheses, and interpret the results in the context  
14 of the GRADE system (see below).[74]  
15  
16  
17  
18  
19  
20  
21  
22  
23  
24  
25  
26  
27  
28  
29  
30  
31  
32  
33

### 34 ***Confidence in the estimates of effect***

35  
36 We will use the GRADE approach to evaluate confidence in effect estimates for all  
37 reported outcomes.[75] GRADE has been adopted by over 70 organizations worldwide,  
38 and this approach facilitates transparent, rigorous and comprehensive assessment of  
39 evidence quality on a per outcome basis.[76-89] Our review of the management of  
40 chronic neuropathic pain will be the first to use the GRADE criteria to evaluate  
41 confidence in effect estimates. We will categorize the confidence in estimates (quality of  
42 evidence) as high, moderate, low, or very low. Using this approach, randomized trials  
43 begin as high quality evidence but may be rated down by one or more of four categories  
44 of limitations. We will use GRADE guidance to determine whether to rate down  
45  
46  
47  
48  
49  
50  
51  
52  
53  
54  
55  
56  
57  
58  
59  
60



1  
2  
3 confidence in the body of evidence for: (1) risk of bias;[87] (2) for imprecision; [81] for  
4 inconsistency;[83] and for publication bias.[84] For the risk of bias assessment, for any  
5 comparisons that suggest a statistically significant treatment effect, we will use recently  
6 developed approaches to address missing participant data for dichotomous outcomes  
7 and continuous outcomes.[90, 91] When plausible worst case scenarios reverse the  
8 treatment effect we will rate down for risk of bias. We will present the results of our  
9 meta-analyses in GRADE Evidence Profiles that will provide a succinct, easily digestible  
10 presentation of the risk of bias and magnitude of effects.[75]  
11  
12  
13  
14  
15  
16  
17  
18  
19  
20  
21  
22  
23

### 24 ***Multiple treatment comparison meta-analyses***

25  
26 To assess relative effects of competing treatments, we will construct a random effects  
27 model within the Bayesian framework using Markov chain Monte Carlo methods.[92]  
28 We will use trace plots and calculate the Gelman-Rubin statistic to assess model  
29 convergence. We will model patient-important outcomes in every treatment group of  
30 every study, and specify the relations among the effect sizes across studies.[93] This  
31 method combines direct and indirect evidence for any given pair of treatments. We will  
32 use the resulting 95% credible intervals (CrIs) to assess the precision of treatment  
33 effects.[94] A key assumption behind multiple treatment comparison meta-analysis is  
34 that the analysed network is consistent or coherent, i.e. that direct and indirect evidence  
35 on the same comparisons do not disagree beyond chance. We will identify and estimate  
36 incoherence by employing a mixed treatment comparisons incoherence model in the  
37 Bayesian framework.[95] For each comparison, we will note the direct estimates and  
38 associated CIs from the previous analysis and calculate the indirect estimate using a  
39  
40  
41  
42  
43  
44  
45  
46  
47  
48  
49  
50  
51  
52  
53  
54  
55  
56  
57  
58  
59  
60

1  
2  
3 node splitting procedure as well as the network estimate. We will conduct a statistical  
4  
5 test for incoherence between the direct and the indirect estimate.  
6  
7  
8  
9

10 We will have assessed confidence in estimates of effect from the direct comparisons in  
11  
12 our pair-wise meta-analyses described previously. For rating confidence in the indirect  
13  
14 comparisons, we will focus our assessments on first-order loops (that is, loops that are  
15  
16 connected to the interventions of interest through only one other intervention; for  
17  
18 example A versus C and B versus C to estimate effects of A versus B) with the lowest  
19  
20 variances, and thus contribute the most to the estimates of effect. Within each loop, our  
21  
22 confidence in the indirect comparison will be the lowest of the confidence ratings we  
23  
24 have assigned to the contributing direct comparisons. For instance, if treatment A  
25  
26 versus C warrants high confidence and B versus C warrants moderate confidence, we  
27  
28 will judge the associated indirect comparison (A versus B) as warranting moderate  
29  
30 confidence. We may rate down confidence in the indirect comparisons further if we have  
31  
32 a strong suspicion that the transitivity assumption (i.e. the assumption that there are no  
33  
34 effect modifiers - such as differences in patients, extent to which interventions have  
35  
36 been optimally administered, differences in the comparator, and differences in how the  
37  
38 outcome has been measured - in the two direct comparisons that may bias the indirect  
39  
40 estimate) has been violated.  
41  
42  
43  
44  
45  
46  
47  
48  
49

50 Our overall judgement of confidence in the network estimate for any paired comparison  
51  
52 will be the higher of the confidence rating amongst the contributing direct and indirect  
53  
54  
55  
56  
57  
58  
59  
60

1  
2  
3 comparisons. However, we may rate down confidence in the network estimate if we find  
4  
5 that the direct and indirect estimates are incoherent.  
6  
7  
8  
9

10 As a secondary analysis, we will rank the interventions using the SUCRA (surface under  
11 the cumulative ranking) method.[96] The SUCRA rankings may be misleading if there is  
12 only evidence warranting low confidence for most comparisons; if the evidence  
13 supporting the higher ranked interventions warrants lower confidence than the evidence  
14 supporting the lower ranked interventions; or if the magnitude of effect is very similar in  
15 higher versus lower ranked comparisons. We will consider these issues in interpreting  
16 the SUCRA rankings.  
17  
18  
19  
20  
21  
22  
23  
24  
25  
26  
27  
28  
29  
30  
31  
32  
33  
34  
35  
36  
37  
38  
39  
40  
41  
42  
43  
44  
45  
46  
47  
48  
49  
50  
51  
52  
53  
54  
55  
56  
57  
58  
59  
60

## DISCUSSION

1  
2  
3  
4  
5  
6  
7  
8 With the established high prevalence of chronic neuropathic pain worldwide, the  
9 associated high socioeconomic burden, and the paucity of evidence on the comparative  
10 effectiveness of treatment options, there is an urgent and critical need for a high-quality  
11 systematic review to inform evidence-based management of chronic neuropathic pain.  
12  
13  
14  
15  
16  
17  
18  
19

20 Our proposed review has several strengths in relation to existing reviews. First, we will  
21 include all non-pharmacological and pharmacological treatment options for all chronic  
22 neuropathic pain syndromes. It is plausible that individual pain syndromes, in general,  
23 respond similarly to similar interventions, and thus by pooling across individual  
24 syndromes, it may be possible to provide a more precise estimate of treatment effect. In  
25 addition, examining all therapies for all chronic neuropathic pain syndromes would  
26 provide comprehensive guidance for management of chronic neuropathic pain, which  
27 increases utility to health care providers, patients, and payers. Second, we will update  
28 the search to present date, explore a wider range of literature databases than existing  
29 reviews, and include eligible articles in all languages. Third, we will make all subjective  
30 decisions, including determining trial eligibility and collecting data, in teams of  
31 reviewers, independently and in duplicate, with assessments of the reproducibility of  
32 judgments. Fourth, we will focus on collecting patient-important outcomes across  
33 IMMPACT-recommended core domains. Fifth, we will use the GRADE approach to  
34 evaluate our confidence in treatment effects. Sixth, we will ensure interpretability by  
35 presenting both risk differences and measures of relative effect for all outcomes  
36  
37  
38  
39  
40  
41  
42  
43  
44  
45  
46  
47  
48  
49  
50  
51  
52  
53  
54  
55  
56  
57  
58  
59  
60

1  
2  
3 reported, and by presenting our findings with GRADE Evidence Profiles. Seventh, we  
4  
5 will generate a limited number of *a priori* subgroup hypotheses to explain heterogeneity  
6  
7  
8 of pooled estimates of treatment effect, and conduct meta-regression and subgroup  
9  
10 analyses consistent with best current practices.  
11  
12

13  
14  
15 As with existing reviews, the results of our proposed systematic review will be limited by  
16  
17 possible shortcomings of the primary studies, including presence of publication bias,  
18  
19 high heterogeneity, and poor quality of reporting and methodological rigor. Another  
20  
21 likely limitation, unique to multiple treatment comparison meta-analyses, will be the  
22  
23 nature of available treatment comparisons to build robust networks for our analyses.  
24  
25  
26  
27

28  
29 The findings of our review will help inform patients with chronic neuropathic pain about  
30  
31 their therapeutic options, so that they can make more autonomous health management  
32  
33 decisions. In addition, to help educate clinicians responsible for managing such  
34  
35 patients, our review will facilitate updating clinical practice guidelines for the  
36  
37 management of chronic neuropathic pain.  
38  
39  
40  
41  
42  
43  
44  
45  
46  
47  
48  
49  
50  
51  
52  
53  
54  
55  
56  
57  
58  
59  
60

## FOOTNOTES

**Funding:** This systematic review is supported by the Canadian Anesthesia Research Foundation and the Canadian Institutes of Health Research.

**Contributors:** All authors made substantial contributions to conception and design. SMM drafted the article, and DNB, DEM, RC, ZI, AA, AP, LW, SMK, AT, VM, DIS, LT, GHG, and JWB revised it critically for important intellectual content. All authors provided final approval of the version to be published.

**Competing Interests:** DEM and AP are chair and member, respectively, of the Canadian Pain Society Guideline Committee for management of chronic neuropathic pain. DEM has received research grant funding from Pfizer Canada, and has received honoraria for educational presentations from Jansenn-Ortho, Lilly, Purdue Pharma and Merck-Frosst. All other authors report no conflicts of interest.

**Acronyms:** Crls: Credible intervals; GRADE: Grading of Recommendations, Assessment, Development and Evaluation; IMMPACT: Initiative on Methods, Measurement, and Pain Assessment in Clinical Trials; MD: Mean difference; MID: Minimally important difference; PRISMA: Preferred Reporting Items for Systematic Reviews and Meta-Analyses; RCTs: Randomized controlled trials; RR: Relative risk; SD: Standard deviation; SE: Standard error; SMD: Standardized mean difference; SUCRA: surface under the cumulative ranking; WMD: Weighted mean difference

## REFERENCES

1. Treede R-D, Jensen TS, Campbell J, Cruccu G, Dostrovsky J, Griffin J, Hansson P, Hughes R, Nurmikko T, Serra J: **Neuropathic pain Redefinition and a grading system for clinical and research purposes.** *Neurology* 2008, **70**:1630-1635.
2. Baron R, Förster M, Binder A: **Subgrouping of patients with neuropathic pain according to pain-related sensory abnormalities: a first step to a stratified treatment approach.** *The Lancet Neurology* 2012, **11**:999-1005.
3. Meyer H: **Neuropathic pain-Current concepts.** *South African Family Practice* 2008, **50**:40-49.
4. Gilron I, Watson CPN, Cahill CM, Moulin DE: **Neuropathic pain: a practical guide for the clinician.** *Canadian Medical Association Journal* 2006, **175**:265-275.
5. O'Donnell MJ, Diener HC, Sacco RL, Panju AA, Vinisko R, Yusuf S: **Chronic pain syndromes after ischemic stroke: PRoFESS trial.** *Stroke* 2013, **44**:1238-1243.
6. Attal N: **Neuropathic pain: mechanisms, therapeutic approach, and interpretation of clinical trials.** *Continuum (Minneapolis, Minn)* 2012, **18**:161-175.
7. van Hecke O, Austin SK, Khan RA, Smith BH, Torrance N: **Neuropathic pain in the general population: A systematic review of epidemiological studies.** *Pain* 2014, **155**:654-662.
8. Doth AH, Hansson PT, Jensen MP, Taylor RS: **The burden of neuropathic pain: a systematic review and meta-analysis of health utilities.** *Pain* 2010, **149**:338-344.
9. McDermott AM, Toelle TR, Rowbotham DJ, Schaefer CP, Dukes EM: **The burden of neuropathic pain: results from a cross-sectional survey.** *European journal of pain (London, England)* 2006, **10**:127-135.
10. Attal N, Lanteri-Minet M, Laurent B, Fermanian J, Bouhassira D: **The specific disease burden of neuropathic pain: results of a French nationwide survey.** *Pain* 2011, **152**:2836-2843.
11. Langley PC, Van Litsenburg C, Cappelleri JC, Carroll D: **The burden associated with neuropathic pain in Western Europe.** *Journal of medical economics* 2013, **16**:85-95.
12. Tarride J, Collet J, Choiniere M, Rousseau C, Gordon A: **The economic burden of neuropathic pain in Canada.** *Journal of medical economics* 2006, **9**:55-68.
13. Berger A, Dukes EM, Oster G: **Clinical characteristics and economic costs of patients with painful neuropathic disorders.** *The journal of pain : official journal of the American Pain Society* 2004, **5**:143-149.
14. Simpson EL, Duenas A, Holmes MW, Papaioannou D, Chilcott J: **Spinal cord stimulation for chronic pain of neuropathic or ischaemic origin: systematic review and economic evaluation.** *Health technology assessment (Winchester, England)* 2009, **13**:iii, ix-x, 1-154.
15. Liu H, Li H, Xu M, Chung KF, Zhang SP: **A systematic review on acupuncture for trigeminal neuralgia.** *Alternative therapies in health and medicine* 2010, **16**:30-35.
16. Pittler MH, Ernst E: **Complementary therapies for neuropathic and neuralgic pain: systematic review.** *The Clinical journal of pain* 2008, **24**:731-733.
17. Wetering EJ, Lemmens KM, Nieboer AP, Huijsman R: **Cognitive and behavioral interventions for the management of chronic neuropathic pain in adults--a systematic review.** *European journal of pain (London, England)* 2010, **14**:670-681.
18. Saarto T, Wiffen PJ: **Antidepressants for neuropathic pain.** *Cochrane database of systematic reviews (Online)* 2007:CD005454.
19. Goodyear-Smith F, Halliwell J: **Anticonvulsants for neuropathic pain: gaps in the evidence.** *The Clinical journal of pain* 2009, **25**:528-536.
20. Eisenberg E, McNicol E, Carr DB: **Opioids for neuropathic pain.** *Cochrane database of systematic reviews (Online)* 2006:CD006146.
21. Sauzet O, Williams JE, Ross J, Branford R, Farquhar-Smith P, Griffith GL, Fox-Rushby JA, Peacock JL: **The Characteristics and Quality of Randomized Controlled Trials in Neuropathic Pain: A Descriptive Study Based on a Systematic Review.** *The Clinical journal of pain* 2012.
22. Hearn L, Derry S, Moore RA: **Lacosamide for neuropathic pain and fibromyalgia in adults.** *Cochrane database of systematic reviews (Online)* 2012, **2**:CD009318.
23. Derry S, Moore RA: **Topical capsaicin (low concentration) for chronic neuropathic pain in adults.** *Cochrane database of systematic reviews (Online)* 2012, **9**:CD010111.

- 1  
2  
3  
4  
5  
6  
7  
8  
9  
10  
11  
12  
13  
14  
15  
16  
17  
18  
19  
20  
21  
22  
23  
24  
25  
26  
27  
28  
29  
30  
31  
32  
33  
34  
35  
36  
37  
38  
39  
40  
41  
42  
43  
44  
45  
46  
47  
48  
49  
50  
51  
52  
53  
54  
55  
56  
57  
58  
59  
60
24. Gill D, Derry S, Wiffen PJ, Moore RA: **Valproic acid and sodium valproate for neuropathic pain and fibromyalgia in adults.** *Cochrane database of systematic reviews (Online)* 2011:CD009183.
  25. Moore RA, Wiffen PJ, Derry S, McQuay HJ: **Gabapentin for chronic neuropathic pain and fibromyalgia in adults.** *Cochrane database of systematic reviews (Online)* 2011:CD007938.
  26. Wiffen PJ, Derry S, Moore RA, McQuay HJ: **Carbamazepine for acute and chronic pain in adults.** *Cochrane database of systematic reviews (Online)* 2011:CD005451.
  27. Chen N, Yang M, He L, Zhang D, Zhou M, Zhu C: **Corticosteroids for preventing postherpetic neuralgia.** *Cochrane database of systematic reviews (Online)* 2010:CD005582.
  28. Collins S, Sigtermans MJ, Dahan A, Zuurmond WW, Perez RS: **NMDA receptor antagonists for the treatment of neuropathic pain.** *Pain medicine (Malden, Mass)* 2010, **11**:1726-1742.
  29. Lunn MP, Hughes RA, Wiffen PJ: **Duloxetine for treating painful neuropathy or chronic pain.** *Cochrane database of systematic reviews (Online)* 2009:CD007115.
  30. Leung A, Donohue M, Xu R, Lee R, Lefaucheur JP, Khedr EM, Saitoh Y, Andre-Obadia N, Rollnik J, Wallace M, Chen R: **rTMS for suppressing neuropathic pain: a meta-analysis.** *The journal of pain : official journal of the American Pain Society* 2009, **10**:1205-1216.
  31. Khaliq W, Alam S, Puri N: **Topical lidocaine for the treatment of postherpetic neuralgia.** *Cochrane database of systematic reviews (Online)* 2007:CD004846.
  32. Vargas-Espinosa ML, Sanmarti-Garcia G, Vazquez-Delgado E, Gay-Escoda C: **Antiepileptic drugs for the treatment of neuropathic pain: a systematic review.** *Medicina oral, patologia oral y cirugia bucal* 2012, **17**:e786-793.
  33. Tremont-Lukats IW, Challapalli V, McNicol ED, Lau J, Carr DB: **Systemic administration of local anesthetics to relieve neuropathic pain: a systematic review and meta-analysis.** *Anesthesia and analgesia* 2005, **101**:1738-1749.
  34. Chaparro LE, Wiffen PJ, Moore RA, Gilron I: **Combination pharmacotherapy for the treatment of neuropathic pain in adults.** *Cochrane database of systematic reviews (Online)* 2012, **7**:Cd008943.
  35. Derry S, Sven-Rice A, Cole P, Tan T, Moore RA: **Topical capsaicin (high concentration) for chronic neuropathic pain in adults.** *Cochrane database of systematic reviews (Online)* 2013, **2**:Cd007393.
  36. Gaskell H, Moore RA, Derry S, Stannard C: **Oxycodone for neuropathic pain and fibromyalgia in adults.** *Cochrane database of systematic reviews (Online)* 2014, **6**:Cd010692.
  37. Hearn L, Derry S, Phillips T, Moore RA, Wiffen PJ: **Imipramine for neuropathic pain in adults.** *Cochrane database of systematic reviews (Online)* 2014, **5**:Cd010769.
  38. Moore RA, Derry S, Aldington D, Cole P, Wiffen PJ: **Amitriptyline for neuropathic pain and fibromyalgia in adults.** *Cochrane database of systematic reviews (Online)* 2012, **12**:Cd008242.
  39. Moore RA, Wiffen PJ, Derry S, Toelle T, Rice AS: **Gabapentin for chronic neuropathic pain and fibromyalgia in adults.** *Cochrane database of systematic reviews (Online)* 2014, **4**:Cd007938.
  40. Straube S, Derry S, Moore RA, Cole P: **Cervico-thoracic or lumbar sympathectomy for neuropathic pain and complex regional pain syndrome.** *Cochrane database of systematic reviews (Online)* 2013, **9**:Cd002918.
  41. Wiffen PJ, Derry S, Lunn MP, Moore RA: **Topiramate for neuropathic pain and fibromyalgia in adults.** *Cochrane database of systematic reviews (Online)* 2013, **8**:Cd008314.
  42. Wiffen PJ, Derry S, Moore RA: **Lamotrigine for chronic neuropathic pain and fibromyalgia in adults.** *Cochrane database of systematic reviews (Online)* 2013, **12**:Cd006044.
  43. Wiffen PJ, Derry S, Moore RA, Aldington D, Cole P, Rice AS, Lunn MP, Hamunen K, Haanpaa M, Kalso EA: **Antiepileptic drugs for neuropathic pain and fibromyalgia - an overview of Cochrane reviews.** *Cochrane database of systematic reviews (Online)* 2013, **11**:Cd010567.
  44. Wiffen PJ, Derry S, Moore RA, Kalso EA: **Carbamazepine for chronic neuropathic pain and fibromyalgia in adults.** *Cochrane database of systematic reviews (Online)* 2014, **4**:Cd005451.
  45. Wiffen PJ, Derry S, Moore RA, Lunn MP: **Levetiracetam for neuropathic pain in adults.** *Cochrane database of systematic reviews (Online)* 2014, **7**:Cd010943.
  46. Derry S, Wiffen PJ, Moore RA, Quinlan J: **Topical lidocaine for neuropathic pain in adults.** *Cochrane database of systematic reviews (Online)* 2014, **7**:Cd010958.



- 1
- 2
- 3
- 4 47. Edelsberg JS, Lord C, Oster G: **Systematic review and meta-analysis of efficacy, safety, and tolerability data from randomized controlled trials of drugs used to treat postherpetic neuralgia.** *The Annals of pharmacotherapy* 2011, **45**:1483-1490.
- 5
- 6 48. Zakrzewska JM, Akram H: **Neurosurgical interventions for the treatment of classical trigeminal neuralgia.** *Cochrane database of systematic reviews (Online)* 2011:CD007312.
- 7
- 8 49. Yang M, Zhou M, He L, Chen N, Zakrzewska JM: **Non-antiepileptic drugs for trigeminal neuralgia.** *Cochrane database of systematic reviews (Online)* 2011:CD004029.
- 9
- 10 50. van Alfen N, van Engelen BG, Hughes RA: **Treatment for idiopathic and hereditary neuralgic amyotrophy (brachial neuritis).** *Cochrane database of systematic reviews (Online)* 2009:CD006976.
- 11
- 12 51. Griebeler ML, Tsapas A, Brito JP, Wang Z, Phung OJ, Montori VM, Murad MH: **Pharmacologic interventions for painful diabetic neuropathy: an umbrella systematic review and comparative effectiveness network meta-analysis (Protocol).** *Systematic reviews* 2012, **1**:61.
- 13
- 14 52. Wong MC, Chung JW, Wong TK: **Effects of treatments for symptoms of painful diabetic neuropathy: systematic review.** *BMJ (Clinical research ed)* 2007, **335**:87.
- 15
- 16 53. Snedecor SJ, Sudharshan L, Cappelleri JC, Sadosky A, Mehta S, Botteman M: **Systematic Review and Meta-Analysis of Pharmacological Therapies for Painful Diabetic Peripheral Neuropathy.** *Pain practice : the official journal of World Institute of Pain* 2013.
- 17
- 18 54. Xia L, Zhong J, Zhu J, Wang YN, Dou NN, Liu MX, Visocchi M, Li ST: **Effectiveness and Safety of Microvascular Decompression Surgery for Treatment of Trigeminal Neuralgia: A Systematic Review.** *The Journal of craniofacial surgery* 2014.
- 19
- 20 55. Rudroju N, Bansal D, Talakokkula ST, Gudala K, Hota D, Bhansali A, Ghai B: **Comparative efficacy and safety of six antidepressants and anticonvulsants in painful diabetic neuropathy: a network meta-analysis.** *Pain physician* 2013, **16**:E705-714.
- 21
- 22 56. Ney JP, Devine EB, Watanabe JH, Sullivan SD: **Comparative efficacy of oral pharmaceuticals for the treatment of chronic peripheral neuropathic pain: meta-analysis and indirect treatment comparisons.** *Pain medicine (Malden, Mass)* 2013, **14**:706-719.
- 23
- 24 57. Selph S, Carson S, Fu R, Thakurta S, Low A, McDonagh M: *Drug Class Review: Neuropathic Pain: Final Update 1 Report.* Portland OR: 2011 by Oregon Health & Science University.; 2011.
- 25
- 26 58. Berger VW: **Is the Jadad score the proper evaluation of trials?** *The Journal of rheumatology* 2006, **33**:1710-1711; author reply 1711-1712.
- 27
- 28 59. **Systematic Review of Quality Assessment Instruments for Randomized Control Trials: Selection of SIGN50 Methodological Checklist** [<http://www.imbi.uni-freiburg.de/OJS/cca/index.php/cca/article/view/5053>]
- 29
- 30 60. Busse JW, Bruno P, Malik K, Connell G, Torrance D, Ngo T, Kirmayr K, Avrahami D, Riva JJ, Ebrahim S, et al: **An efficient strategy allowed English-speaking reviewers to identify foreign-language articles eligible for a systematic review.** *Journal of clinical epidemiology* 2014, **67**:547-553.
- 31
- 32 61. Landis JR, Koch GG: **The measurement of observer agreement for categorical data.** *Biometrics* 1977, **33**:159-174.
- 33
- 34 62. Turk DC, Dworkin RH, Allen RR, Bellamy N, Brandenburg N, Carr DB, Cleeland C, Dionne R, Farrar JT, Galer BS, et al: **Core outcome domains for chronic pain clinical trials: IMMPACT recommendations.** *Pain* 2003, **106**:337-345.
- 35
- 36 63. Turk DC, Dworkin RH, Revicki D, Harding G, Burke LB, Cella D, Cleeland CS, Cowan P, Farrar JT, Hertz S, et al: **Identifying important outcome domains for chronic pain clinical trials: an IMMPACT survey of people with pain.** *Pain* 2008, **137**:276-285.
- 37
- 38 64. Ioannidis JP, Lau J: **Completeness of safety reporting in randomized trials: an evaluation of 7 medical areas.** *JAMA : the journal of the American Medical Association* 2001, **285**:437-443.
- 39
- 40 65. Akl EA, Sun X, Busse JW, Johnston BC, Briel M, Mulla S, You JJ, Bassler D, Lamontagne F, Vera C, et al: **Specific instructions for estimating unclearly reported blinding status in randomized trials were reliable and valid.** *Journal of clinical epidemiology* 2012, **65**:262-267.
- 41
- 42 66. Higgins JP, Green S: **Cochrane Handbook for Systematic Reviews of Interventions, Version [5.1.0] (updated March 2011).** In *Book Cochrane Handbook for Systematic Reviews of Interventions, Version [5.1.0] (updated March 2011)* (Editor ed. Aeds.). City: The Cochrane Collaboration [2011].
- 43
- 44 67. DerSimonian R, Laird N: **Meta-analysis in clinical trials.** *Controlled clinical trials* 1986, **7**:177-188.
- 45
- 46
- 47
- 48
- 49
- 50
- 51
- 52
- 53
- 54
- 55
- 56
- 57
- 58
- 59
- 60

- 1  
2  
3  
4  
5  
6  
7  
8  
9  
10  
11  
12  
13  
14  
15  
16  
17  
18  
19  
20  
21  
22  
23  
24  
25  
26  
27  
28  
29  
30  
31  
32  
33  
34  
35  
36  
37  
38  
39  
40  
41  
42  
43  
44  
45  
46  
47  
48  
49  
50  
51  
52  
53  
54  
55  
56  
57  
58  
59  
60
68. Cornell JE, Mulrow CD, Localio R, Stack CB, Meibohm AR, Guallar E, Goodman SN: **Random-Effects Meta-analysis of Inconsistent Effects: A Time for Change.** *Annals of internal medicine* 2014, **160**:267-270-270.
69. Brockwell SE, Gordon IR: **A comparison of statistical methods for meta-analysis.** *Statistics in medicine* 2001, **20**:825-840.
70. Guolo A: **Higher-order likelihood inference in meta-analysis and meta-regression.** *Statistics in medicine* 2012, **31**:313-327.
71. Thorlund K, Walter SD, Johnston BC, Furukawa TA, Guyatt GH: **Pooling health-related quality of life outcomes in meta-analysis—a tutorial and review of methods for enhancing interpretability.** *Research Synthesis Methods* 2011.
72. Higgins JP, Thompson SG: **Quantifying heterogeneity in a meta-analysis.** *Statistics in medicine* 2002, **21**:1539-1558.
73. Higgins JP, Thompson SG, Deeks JJ, Altman DG: **Measuring inconsistency in meta-analyses.** *BMJ (Clinical research ed)* 2003, **327**:557-560.
74. Altman DG, Bland JM: **Interaction revisited: the difference between two estimates.** *BMJ (Clinical research ed)* 2003, **326**:219.
75. Atkins D, Best D, Briss PA, Eccles M, Falck-Ytter Y, Flottorp S, Guyatt GH, Harbour RT, Haugh MC, Henry D, et al: **Grading quality of evidence and strength of recommendations.** *BMJ (Clinical research ed)* 2004, **328**:1490.
76. Balslem H, Helfand M, Schunemann HJ, Oxman AD, Kunz R, Brozek J, Vist GE, Falck-Ytter Y, Meerpohl J, Norris S, Guyatt GH: **GRADE guidelines: 3. Rating the quality of evidence.** *Journal of clinical epidemiology* 2011, **64**:401-406.
77. Brunetti M, Shemilt I, Pregno S, Vale L, Oxman AD, Lord J, Sisk J, Ruiz F, Hill S, Guyatt GH, et al: **GRADE guidelines: 10. Considering resource use and rating the quality of economic evidence.** *Journal of clinical epidemiology* 2013, **66**:140-150.
78. Guyatt G, Oxman AD, Akl EA, Kunz R, Vist G, Brozek J, Norris S, Falck-Ytter Y, Glasziou P, DeBeer H, et al: **GRADE guidelines: 1. Introduction-GRADE evidence profiles and summary of findings tables.** *Journal of clinical epidemiology* 2011, **64**:383-394.
79. Guyatt G, Oxman AD, Sultan S, Brozek J, Glasziou P, Alonso-Coello P, Atkins D, Kunz R, Montori V, Jaeschke R, et al: **GRADE guidelines: 11. Making an overall rating of confidence in effect estimates for a single outcome and for all outcomes.** *Journal of clinical epidemiology* 2013, **66**:151-157.
80. Guyatt GH, Oxman AD, Kunz R, Atkins D, Brozek J, Vist G, Alderson P, Glasziou P, Falck-Ytter Y, Schunemann HJ: **GRADE guidelines: 2. Framing the question and deciding on important outcomes.** *Journal of clinical epidemiology* 2011, **64**:395-400.
81. Guyatt GH, Oxman AD, Kunz R, Brozek J, Alonso-Coello P, Rind D, Devereaux PJ, Montori VM, Freyschuss B, Vist G, et al: **GRADE guidelines 6. Rating the quality of evidence--imprecision.** *Journal of clinical epidemiology* 2011, **64**:1283-1293.
82. Guyatt GH, Oxman AD, Kunz R, Woodcock J, Brozek J, Helfand M, Alonso-Coello P, Falck-Ytter Y, Jaeschke R, Vist G, et al: **GRADE guidelines: 8. Rating the quality of evidence--indirectness.** *Journal of clinical epidemiology* 2011, **64**:1303-1310.
83. Guyatt GH, Oxman AD, Kunz R, Woodcock J, Brozek J, Helfand M, Alonso-Coello P, Glasziou P, Jaeschke R, Akl EA, et al: **GRADE guidelines: 7. Rating the quality of evidence--inconsistency.** *Journal of clinical epidemiology* 2011, **64**:1294-1302.
84. Guyatt GH, Oxman AD, Montori V, Vist G, Kunz R, Brozek J, Alonso-Coello P, Djulbegovic B, Atkins D, Falck-Ytter Y, et al: **GRADE guidelines: 5. Rating the quality of evidence--publication bias.** *Journal of clinical epidemiology* 2011, **64**:1277-1282.
85. Guyatt GH, Oxman AD, Santesso N, Helfand M, Vist G, Kunz R, Brozek J, Norris S, Meerpohl J, Djulbegovic B, et al: **GRADE guidelines: 12. Preparing summary of findings tables-binary outcomes.** *Journal of clinical epidemiology* 2013, **66**:158-172.
86. Guyatt GH, Oxman AD, Sultan S, Glasziou P, Akl EA, Alonso-Coello P, Atkins D, Kunz R, Brozek J, Montori V, et al: **GRADE guidelines: 9. Rating up the quality of evidence.** *Journal of clinical epidemiology* 2011, **64**:1311-1316.

- 1  
2  
3 87. Guyatt GH, Oxman AD, Vist G, Kunz R, Brozek J, Alonso-Coello P, Montori V, Akl EA, Djulbegovic B, Falck-  
4 Ytter Y, et al: **GRADE guidelines: 4. Rating the quality of evidence--study limitations (risk of bias).** *Journal*  
5 *of clinical epidemiology* 2011, **64**:407-415.
- 6 88. Guyatt GH, Thorlund K, Oxman AD, Walter SD, Patrick D, Furukawa TA, Johnston BC, Karanickolas P, Akl EA,  
7 Vist G, et al: **GRADE guidelines: 13. Preparing summary of findings tables and evidence profiles-**  
8 **continuous outcomes.** *Journal of clinical epidemiology* 2013, **66**:173-183.
- 9 89. Andrews J, Guyatt G, Oxman AD, Alderson P, Dahm P, Falck-Ytter Y, Nasser M, Meerpohl J, Post PN, Kunz  
10 R, et al: **GRADE guidelines: 15. Going from evidence to recommendations: the significance and**  
11 **presentation of recommendations.** *Journal of clinical epidemiology* 2013.
- 12 90. Ebrahim S, Akl EA, Mustafa RA, Sun X, Walter SD, Heels-Ansdell D, Alonso-Coello P, Johnston BC, Guyatt  
13 GH: **Addressing continuous data for participants excluded from trial analysis: a guide for systematic**  
14 **reviewers.** *Journal of clinical epidemiology* 2013.
- 15 91. Akl EA, Johnston BC, Alonso-Coello P, Neumann I, Ebrahim S, Briel M, Cook DJ, Guyatt GH: **Addressing**  
16 **dichotomous data for participants excluded from trial analysis: a guide for systematic reviewers.** *PLoS*  
17 *One* 2013, **8**:e57132.
- 18 92. Ades AE, Sculpher M, Sutton A, Abrams K, Cooper N, Welton N, Lu G: **Bayesian methods for evidence**  
19 **synthesis in cost-effectiveness analysis.** *PharmacoEconomics* 2006, **24**:1-19.
- 20 93. Salanti G, Higgins JP, Ades AE, Ioannidis JP: **Evaluation of networks of randomized trials.** *Statistical*  
21 *methods in medical research* 2008, **17**:279-301.
- 22 94. Sterne JA, Davey Smith G: **Sifting the evidence-what's wrong with significance tests?** *BMJ (Clinical*  
23 *research ed)* 2001, **322**:226-231.
- 24 95. Lu G, Ades A: **Assessing evidence inconsistency in mixed treatment comparisons.** *Journal of the American*  
25 *Statistical Association* 2006, **101**:447-459.
- 26 96. Salanti G, Ades AE, Ioannidis JP: **Graphical methods and numerical summaries for presenting results**  
27 **from multiple-treatment meta-analysis: an overview and tutorial.** *Journal of clinical epidemiology* 2011,  
28 **64**:163-171.
- 29  
30  
31  
32  
33  
34  
35  
36  
37  
38  
39  
40  
41  
42  
43  
44  
45  
46  
47  
48  
49  
50  
51  
52  
53  
54  
55  
56  
57  
58  
59  
60

## Appendix 1: Proposed search strategy for MEDLINE

Database: Ovid MEDLINE(R) In-Process & Other Non-Indexed Citations, Ovid MEDLINE(R) Daily and Ovid MEDLINE(R) <1946 to Present>

[mp=title, abstract, original title, name of substance word, subject heading word, keyword heading word, protocol supplementary concept word, rare disease supplementary concept word, unique identifier]

### Search Strategy:

11 peripheral nervous system diseases/ or brachial plexus neuropathies/ or brachial plexus neuritis/ or complex regional pain syndromes/ or causalgia/ or reflex sympathetic dystrophy/ or diabetic neuropathies/ or giant axonal neuropathy/ or guillain-barre syndrome/ or mononeuropathies/ or femoral neuropathy/ or median neuropathy/ or peroneal neuropathies/ or radial neuropathy/ or sciatic neuropathy/ or sciatica/ or tibial neuropathy/ or tarsal tunnel syndrome/ or ulnar neuropathies/ or cubital tunnel syndrome/ or ulnar nerve compression syndromes/ or nerve compression syndromes/ or carpal tunnel syndrome/ or piriformis muscle syndrome/ or pudendal neuralgia/ or thoracic outlet syndrome/ or cervical rib syndrome/ or neuralgia/ or neuralgia, postherpetic/ or neuritis/ or polyneuropathies/ or alcoholic neuropathy/ or "hereditary sensory and motor neuropathy"/ or alstrom syndrome/ or charcot-marie-tooth disease/ or refsum disease/ or spastic paraplegia, hereditary/ or poems syndrome/ or polyradiculoneuropathy/ or polyradiculoneuropathy, chronic inflammatory demyelinating/ or polyradiculopathy/ or radiculopathy/ (92706)

2 exp central nervous system disease/ (1143738)

3 "autoimmune diseases of the nervous system"/ or myelitis, transverse/ or neuromyelitis optica/ or polyradiculoneuropathy/ or guillain-barre syndrome/ or "hereditary sensory and autonomic neuropathies"/ or polyradiculoneuropathy, chronic inflammatory demyelinating/ (10899)

4 Fabry Disease/ (2583)

5 Angiokeratoma/ (601)

6 Paraneoplastic Polyneuropathy/ (201)

7 Glossalgia/ (247)

8 Burning Mouth Syndrome/ (732)

9 Syringomyelia/ (3155)

10 Paroxysmal Hemicrania/ (75)

11 Trigeminal Autonomic Cephalalgias/ (105)

12 Phantom Limb/ (1528)

13 Thalamic Diseases/ (1103)

14 neuropath\*.mp. (102493)

15 mononeuropath\*.mp. (1492)

16 polyneuropath\*.mp. (13247)

17 polyradiculoneuropath\*.mp. (5027)

18 (Guillian adj Barre).mp. (87)

19 (Guillain adj Barre).mp. (7148)

1  
2  
3 20 (lewis adj sumner).mp. (49)  
4 21 (charcot adj marie adj tooth).mp. (3790)  
5 22 HMSN.mp. (432)  
6 23 Peroneal muscular atrophy.mp. (165)  
7 24 Guyon.ti,ab. (137)  
8 25 Pronator teres.mp. (270)  
9 26 (Struther\$ adj ligament).mp. (18)  
10 27 Wartenberg\$.mp. (116)  
11 28 Angiokeratoma.mp. (886)  
12 29 (Anderson adj Fabry).mp. (208)  
13 30 neuritis.mp. (13529)  
14 31 neuronopath\*.mp. (989)  
15 32 myelinopath\*.mp. (172)  
16 33 distal axonopath\*.mp. (229)  
17 34 HIV-DSP.mp. (15)  
18 35 Post-mastectomy pain.mp. (27)  
19 36 Phantom limb.mp. (1828)  
20 37 agnosia.mp. (2575)  
21 38 plexopathy.mp. (723)  
22 39 Radiculopathy.mp. (6164)  
23 40 Glossodynia.mp. (136)  
24 41 Stomatodynia.mp. (45)  
25 42 (transverse adj myelitis).mp. (1338)  
26 43 Fothergill\*.mp. (75)  
27 44 myelopath\*.mp. (9661)  
28 45 (Dejerine adj Roussy).mp. (37)  
29 46 Syringomyelia.mp. (3784)  
30 47 (Ramsay adj hunt).mp. (440)  
31 48 (ramsey adj hunt).mp. (23)  
32 49 sciatica.mp. (5358)  
33 50 exp Multiple Sclerosis/ (44211)  
34 51 exp Parkinsonian Disorders/ (58601)  
35 52 parkinson.mp. (61412)  
36 53 exp Stroke/ (85841)  
37 54 (post adj stroke).mp. (3958)  
38 55 thalamic\*.mp. (24137)  
39 56 exp Spinal Cord Injuries/ (37723)  
40 57 cauda equina/ (2816)  
41 58 cauda equina.mp. (4587)  
42 59 exp Ophthalmoplegia/ (9669)  
43 60 exp Herpes Zoster/ (9636)  
44 61 postherpetic.mp. (1800)  
45 62 Diabetic Neuropathies/ (12033)  
46 63 small fiber.mp. (716)  
47 64 exp HIV/ (84444)  
48 65 hiv.mp. (275179)  
49  
50  
51  
52  
53  
54  
55  
56  
57  
58  
59  
60

- 1  
2  
3 66 or/1-65 (1625784)  
4 67 neuropath\*.mp. (102493)  
5 68 neuralgi\*.mp. (18296)  
6 69 facial pain/ (5019)  
7 70 phantom limb/ (1528)  
8 71 phantom limb.mp. (1828)  
9 72 CRPS.ti,ab. (1390)  
10 73 CPSP.ti,ab. (157)  
11 74 burning mouth syndrome/ (732)  
12 75 dysesthe\*.ti,ab. (1613)  
13 76 (chronic adj2 pain).ti,ab. (31746)  
14 77 pain measurement/ (60773)  
15 78 or/67-77 (201452)  
16 79 66 and 78 (119454)  
17 80 Trigeminal Neuralgia/ (5540)  
18 81 Facial Neuralgia/ (1121)  
19 82 Facial Pain/ (5019)  
20 83 Glossalgia/ (247)  
21 84 Burning Mouth Syndrome/ (732)  
22 85 Trigeminal Autonomic Cephalalgias/ (105)  
23 86 neuralgia/ or neuralgia, postherpetic/ or piriformis muscle syndrome/ or pudendal  
24 neuralgia/ or sciatica/ (12818)  
25 87 neuralgi\*.mp. (18296)  
26 88 Post-mastectomy pain.mp. (27)  
27 89 postmastectomy pain syndrome.mp. (24)  
28 90 PMPS.mp. (406)  
29 91 Post-thoracotomy pain.mp. (234)  
30 92 Phantom limb.mp. (1828)  
31 93 agnosia.mp. (2575)  
32 94 Glossodynia.mp. (136)  
33 95 Stomatodynia.mp. (45)  
34 96 (tic adj do?lo?re?ux?).mp. (300)  
35 97 Prosopalgia.mp. (15)  
36 98 meralgia paresthetica.mp. (277)  
37 99 metatarsalgia.mp. (566)  
38 100 (Ramsay adj hunt).mp. (440)  
39 101 odontalgia.mp. (151)  
40 102 sciatica.mp. (5358)  
41 103 (Pain adj2 clinic).ti,ab. (1417)  
42 104 (chronic adj2 pain).ti,ab. (31746)  
43 105 (Neurogen\* adj2 pain).ti,ab. (429)  
44 106 low back pain/ (14091)  
45 107 or/80-106 (77534)  
46 108 79 or 107 (176257)  
47 109 (dh or dt or pc or rh or rt or su or th).fs. (5395344)  
48 110 exp Analgesia/ (31987)  
49  
50  
51  
52  
53  
54  
55  
56  
57  
58  
59  
60

1  
2  
3 111 exp Analgesics/ (433810)  
4 112 analges\*.mp. (140770)  
5 113 treat\*.mp. (4077132)  
6 114 therap\*.mp. (2410630)  
7 115 intervention\*.mp. (583724)  
8 116 manag\*.mp. (963377)  
9 117 or/109-116 (8422296)  
10 118 108 and 117 (104367)  
11 119 randomized controlled trial.pt. (376906)  
12 120 controlled clinical trial.pt. (88589)  
13 121 randomized.ab. (297403)  
14 122 placebo.ab. (155216)  
15 123 drug therapy.fs. (1709609)  
16 124 randomly.ab. (215113)  
17 125 trial.ab. (308899)  
18 126 groups.ab. (1367352)  
19 127 or/119-126 (3364472)  
20 128 exp animals/ not humans.sh. (3955572)  
21 129 127 not 128 (2886355)  
22 130 118 and 129 (36678)  
23 131 limit 130 to "therapy (maximizes sensitivity)" (30615)  
24 132 limit 131 to "review articles" (6311)  
25 133 131 not 132 (24304)  
26 134 Transcranial Magnetic Stimulation/ (6992)  
27 135 rtms.mp. (2511)  
28 136 magnetics/tu (807)  
29 137 134 or 135 or 136 (8481)  
30 138 pain.mp. (480976)  
31 139 137 and 138 (542)  
32 140 133 or 139 (24765)  
33  
34  
35  
36  
37  
38  
39  
40  
41  
42  
43  
44  
45  
46  
47  
48  
49  
50  
51  
52  
53  
54  
55  
56  
57  
58  
59  
60

## Appendix 2: List of chronic neuropathic pain syndromes

- Central neuropathic pain
  - Parkinson disease-related pain
  - Compressive myelopathy from spinal stenosis
  - Post-traumatic spinal cord injury pain
  - Syringomyelia
  - HIV myelopathy
  - Multiple-sclerosis related pain
  - Post-ischemic myelopathy
  - Post-radiation myelopathy
  - Central post-stroke pain
    - Thalamic pain syndrome
    - Dejerine–Roussy syndrome
  - Transverse myelitis
- Peripheral neuropathic pain
  - Alcoholic neuropathy/polyneuropathy
  - Charcot-Marie-Tooth disease
    - Charcot-Marie-Tooth neuropathy
    - Hereditary motor and sensory neuropathy (HMSN)
    - Peroneal muscular atrophy (PMA)
  - Fabry disease (Fabry's disease, Anderson-Fabry disease, angiokeratoma corporis diffusum and alpha-galactosidase A deficiency)
  - Idiopathic sensory neuropathy
  - Nutritional deficiency-related neuropathies
    - Thiamine-deficiency neuropathy/beriberi neuropathy
  - Painful diabetic neuropathy
  - Abdominal migraine
  - Axillary neuropathy
  - Complex regional pain syndrome
    - Reflex sympathetic dystrophy
    - Causalgia
  - Entrapment neuropathies (nerve compression syndromes, compression neuropathy)
    - Anterior interosseous syndrome
    - Carpal tunnel syndrome
    - Cubital tunnel syndrome
    - Guyon's canal syndrome
    - Posterior interosseous neuropathy
    - Pronator teres syndrome
    - Radial neuropathy
    - Struthers' ligament syndrome
    - Wartenberg's Syndrome



- Nerve compression or infiltration by tumour
- Post-mastectomy pain
- Post-thoracotomy pain
- Post-surgical/post-operative neuropathic pain
- Phantom limb pain
- Radiculopathy (cervical, thoracic or lumbosacral)
- Post-traumatic neuralgia
- Meralgia paresthetica (neuropathy of the lateral femoral cutaneous nerve)
- Obturator neuralgia
- Femoral neuralgia
- Sciatic neuralgia
- Morton's neuralgia (interdigital metatarsalgia)
- Piriformis syndrome(technically a variation on sciatic)
- Cauda equina syndrome
- Post mastectomy pain is sometimes referred to (in the IASP taxonomy) as post mastectomypain syndrome
- Post thoracotomy pain syndrome
- Internal mammary artery syndrome (post cardiac surgery Internal Mammary nerve neuralgia)
- Segmental or intercostal neuralgia
- Abdominal cutaneous nerve entrapment syndrome
- Neuralgias of the genitofemoral, ilioinguinal, iliohypogastric, or pudendal nerves
- Facial nerves - neuralgias associated with each and every nerve including the branches of the trigeminal (V1-2-3); 7th nerve (Ramsay Hunt syndrome); glossopharyngeal nerve
- Occipital neuralgias
- Painful ophthalmoplegia;
- Odontalgia
- Chronic paroxysmal hemicrania
- Thoracic outlet syndrome
- Acute and chronic inflammatory demyelinating polyradiculoneuropathy
  - Guillain–Barré syndrome
  - Lewis-Sumner syndrome
- Cancer-related neuropathy
  - Chemotherapy-induced peripheral neuropathy
  - Radiotherapy-induced peripheral neuropathy
- HIV-sensory neuropathy
  - HIV-associated distal sensory polyneuropathy (HIV-DSP)
- Postherpetic neuralgia
- Postradiation plexopathy
- Progressive inflammatory neuropathy
- Stomatodynia
  - Glossodynia
  - Burning mouth syndrome
- Toxic exposure-related neuropathies

- 1
- 2
- 3
- 4
- 5
- 6
- 7
- 8
- 9
- 10
- 11
- 12
- 13
- 14
- 15
- 16
- 17
- 18
- 19
- 20
- 21
- 22
- 23
- 24
- 25
- 26
- 27
- 28
- 29
- 30
- 31
- 32
- 33
- 34
- 35
- 36
- 37
- 38
- 39
- 40
- 41
- 42
- 43
- 44
- 45
- 46
- 47
- 48
- 49
- 50
- 51
- 52
- 53
- 54
- 55
- 56
- 57
- 58
- 59
- 60
- Trigeminal neuralgia (Tic douloureux)
  - Prosopalgia
  - Suicide disease
  - Fothergill's disease
- Vasculitic neuropathy
- Wartenberg's migratory sensory neuropathy

For peer review only
