# Supplementary material for: Management of chronic neuropathic pain: a protocol for a multiple treatment comparison meta-analysis of randomised controlled trials
Source: HighWire-hosted journal article supplement (doi:10.1136/bmjopen-2014-006112), 2014-11-01
Supplement: bmjopen-2014-006112supp2_new.pdf [file bmjopen-2014-006112supp2_new.pdf]

## Appendix 2: List of chronic neuropathic pain syndromes

- Central neuropathic pain
  - Parkinson disease-related pain
  - Compressive myelopathy from spinal stenosis
  - Post-traumatic spinal cord injury pain
  - Syringomyelia
  - HIV myelopathy
  - Multiple-sclerosis related pain
  - Post-ischemic myelopathy
  - Post-radiation myelopathy
  - Central post-stroke pain
    - Thalamic pain syndrome
    - Dejerine–Roussy syndrome
  - Transverse myelitis
- Peripheral neuropathic pain
  - Alcoholic neuropathy/polyneuropathy
  - Charcot-Marie-Tooth disease
    - Charcot-Marie-Tooth neuropathy
    - Hereditary motor and sensory neuropathy (HMSN)
    - Peroneal muscular atrophy (PMA)
  - Fabry disease (Fabry's disease, Anderson-Fabry disease, angiokeratoma corporis diffusum and alpha-galactosidase A deficiency)
  - Idiopathic sensory neuropathy
  - Nutritional deficiency-related neuropathies
    - Thiamine-deficiency neuropathy/beriberi neuropathy
  - Painful diabetic neuropathy
  - Axillary neuropathy
  - Complex regional pain syndrome
    - Reflex sympathetic dystrophy
    - Causalgia
  - Entrapment neuropathies (nerve compression syndromes, compression neuropathy)
    - Anterior interosseous syndrome
    - Carpal tunnel syndrome
    - Cubital tunnel syndrome
    - Guyon's canal syndrome
    - Posterior interosseous neuropathy
    - Pronator teres syndrome
    - Radial neuropathy
    - Struthers' ligament syndrome
    - Wartenberg's Syndrome
  - Nerve compression or infiltration by tumour

- Post-mastectomy pain
- Post-thoracotomy pain
- Post-surgical/post-operative neuropathic pain
- Phantom limb pain
- Radiculopathy (cervical, thoracic or lumbosacral)
- Post-traumatic neuralgia
- Meralgia paresthetica (neuropathy of the lateral femoral cutaneous nerve)
- Obturator neuralgia
- Femoral neuralgia
- Sciatic neuralgia
- Morton's neuralgia (interdigital metatarsalgia)
- Piriformis syndrome (technically a variation on sciatic)
- Cauda equina syndrome
- Post mastectomy pain is sometimes referred to (in the IASP taxonomy) as post mastectomy pain syndrome
- Post thoracotomy pain syndrome
- Internal mammary artery syndrome (post cardiac surgery Internal Mammary nerve neuralgia)
- Segmental or intercostal neuralgia
- Abdominal cutaneous nerve entrapment syndrome
- Neuralgias of the genitofemoral, ilioinguinal, iliohypogastric, or pudendal nerves
- Facial nerves - neuralgias associated with each and every nerve including the branches of the trigeminal (V1-2-3); 7th nerve (Ramsay Hunt syndrome); glossopharyngeal nerve
- Occipital neuralgias
- Painful ophthalmoplegia;
- Odontalgia
- Thoracic outlet syndrome
- Acute and chronic inflammatory demyelinating polyradiculoneuropathy
  - Guillain-Barré syndrome
  - Lewis-Sumner syndrome
- Cancer-related neuropathy
  - Chemotherapy-induced peripheral neuropathy
  - Radiotherapy-induced peripheral neuropathy
- HIV-sensory neuropathy
  - HIV-associated distal sensory polyneuropathy (HIV-DSP)
- Postherpetic neuralgia
- Postradiation plexopathy
- Progressive inflammatory neuropathy
- Stomatodynia
  - Glossodynia
  - Burning mouth syndrome
- Toxic exposure-related neuropathies
- Trigeminal neuralgia (Tic douloureux)
  - Prosopalgia

- Suicide disease
  - Fothergill's disease
- Vasculitic neuropathy
- Wartenberg's migratory sensory neuropathy
